# Supplementary material for: General electron–donor–acceptor complex mediated thioesterification reaction via site-selective C–H functionalization using aryl sulfonium Salts
Source: Royal Society of Chemistry journal article supplement (doi:10.1039/d4gc03768e), 2024-01-01
Supplement: d4gc03768e1.pdf [file d4gc03768e1.pdf]

## SUPPORTING INFORMATION

### General Electron-Donor-Acceptor Complex Mediated Thioesterification Reaction *via* Site-Selective C-H Functionalization using Aryl Sulfonium Salts

Roshan I. Patel,<sup>a</sup> Barakha Saxena,<sup>a</sup> and Anuj Sharma\*<sup>a</sup>

<sup>a</sup>Green Organic Synthesis Laboratory, Department of Chemistry, Indian Institute of Technology, Roorkee  
Roorkee, 247667, Uttarakhand (India)

E-mail: anujsharma.mcl@gmail.com, anuj.sharma@cy.iitr.ac.in

## Table of Content

|                                                                                                           |            |
|-----------------------------------------------------------------------------------------------------------|------------|
| <b>1. General information</b> .....                                                                       | <b>3</b>   |
| <b>2. Optimization of reaction conditions</b> .....                                                       | <b>4</b>   |
| 2.1 Screening of solvent.....                                                                             | 4          |
| 2.2 Screening of additive.....                                                                            | 4          |
| 2.3 Optimization of different equivalents of potassium thioacetate.....                                   | 5          |
| 2.4 Screening of light irradiation.....                                                                   | 5          |
| <b>3. General Procedure and Characterization of Products</b> .....                                        | <b>6</b>   |
| 3.1 General Procedure for the Synthesis of Synthesis of aryl sulfonium salts .....                        | 6          |
| 3.2 General Procedure for the Synthesis of Potassium thioacid salts.....                                  | 8          |
| 3.3 General procedure-A for the synthesis of aryl thioester using potassium thioacetate.....              | 10         |
| 3.4 General procedure-B for the synthesis of aryl thioester using different potassium thioacid salts..... | 10         |
| 3.5. Unsuitable substrates.....                                                                           | 11         |
| <b>4. Mechanistic Studies</b> .....                                                                       | <b>11</b>  |
| 4.1 UV-visible absorption spectra.....                                                                    | 11         |
| 4.2 Job's plot.....                                                                                       | 12         |
| 4.3 <sup>1</sup> H-NMR titration experiment.....                                                          | 12         |
| 4.4 Radical Trapping Experiments.....                                                                     | 14         |
| 4.5. Natural sunlight irradiation.....                                                                    | 17         |
| 4.6. Quantum Yield ( $\Phi$ ).....                                                                        | 18         |
| 4.7. Sensitivity assessment of reaction.....                                                              | 21         |
| 4.8. Scale-up and recyclability of sulfonium salt.....                                                    | 22         |
| 4.9. Calculation of green chemistry metrics.....                                                          | 24         |
| <b>5. NMR data</b> .....                                                                                  | <b>27</b>  |
| 5.1. Characterization Data of Products.....                                                               | 27         |
| 5.2. NMR spectrum.....                                                                                    | 50         |
| <b>6. References</b> .....                                                                                | <b>100</b> |

## 1. General Information

**Chemicals:** Commercially available reagents and analytical grade solvents were obtained from local suppliers and were used as received. Molecular Sieve 4Å (0.4 nm) (1.6 - 3 mm beads), were purchased from SRL chemicals (product code: 72866, CAS no: 70955-01-0) and were pre-heated in hot air oven for 2-hours prior to use.

**NMR Spectra:**  $^1\text{H}$ ,  $^{13}\text{C}$  and  $^{19}\text{F}$ -NMR spectra were recorded on a JEOL (500 MHz  $^1\text{H}$ , 126 MHz  $^{13}\text{C}$ , 471 MHz  $^{19}\text{F}$ ) spectrometers using deuterated NMR solvents with tetramethylsilane (TMS) as internal standard. In the evaluation of  $^1\text{H}$ -NMR spectra, chemical shift has been assigned in units of parts per million (ppm), wherein, “s” stands for singlet, “d” for doublet, “t” for triplet, “q” for quartet, “qu” for quintet, “dd” for doublet of doublets”, “tt” for triplet of triplets, “dt” for doublet of triplets”, “td” for triplet of doublets”, “sext” for (sextet) and “m” for multiplet. The units of coupling constant (J) has been assigned in Hz.

**HRMS :** High resolution mass spectra quadrupole time-of-flight (HRMS-QTOF) was obtained in ESI mode.

**Chromatography:** Reactions were monitored on Merck TLC silica gel 60 F254 plates and visualized using ultraviolet light of wavelength 254 nm. Column chromatography was performed on silica gel (100-200 mesh), eluted with hexane/ethyl acetate as mobile phase.

**Melting points (mp):** Measurements were recorded on a OptiMelt, automated melting point apparatus (Stanford Research Systems, Inc.).

**Photoreactor:** Visible light reaction was performed using a 40W Kessil PR160L lamp (427 nm), placed 3 cm away from reaction vials. The reaction setup was placed within a ventilated fume hood and using a fan to avoid overheating.

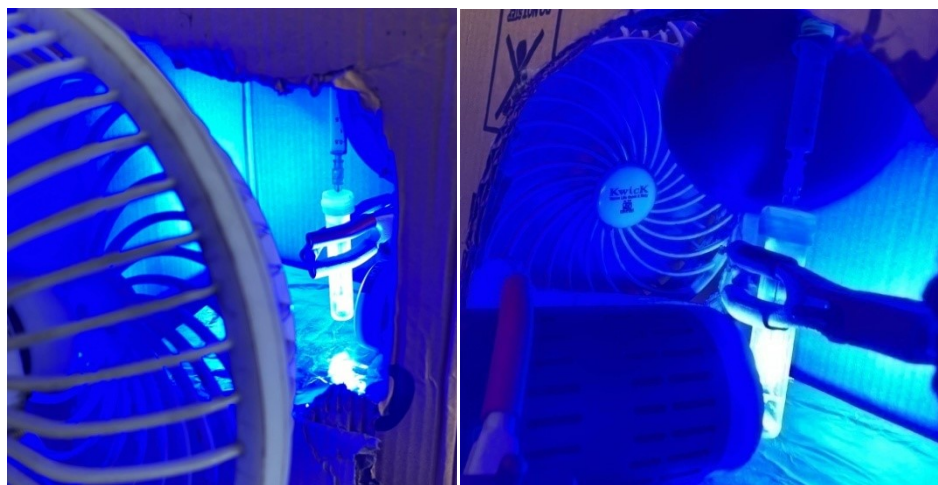

## 2. Optimization of Reaction Conditions

### 2.1 Screening of Solvent

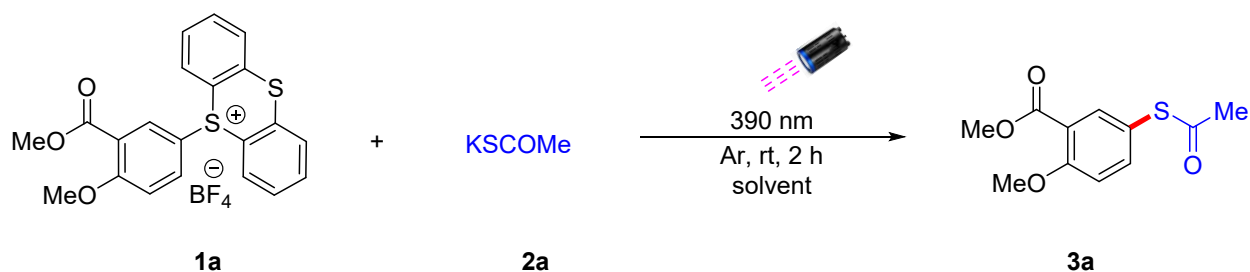

| Entry | Solvent | Isolated Yield (%) |
|-------|---------|--------------------|
| 1     | DMSO    | 69%                |
| 2     | MeCN    | 58%                |
| 3     | DCM     | 37%                |
| 4     | THF     | 25%                |
| 5     | DMA     | 48%                |
| 6     | DMF     | 43%                |
| 7     | EtOAc   | 54%                |

Reaction conditions: **1a** (0.1 mmol), **2a** (0.2 mmol, 2.0 equiv.) in solvent (0.8 mL) under purple Kessil ( $\lambda = 390$  nm) irradiation for 2 h at rt under argon atmosphere.

### 2.2 Screening of Additive

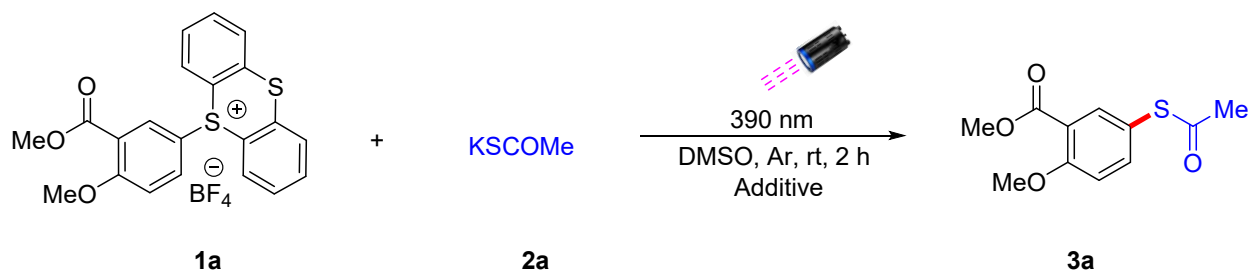

| Entry | Additive                        | Isolated Yield% |
|-------|---------------------------------|-----------------|
| 1     | SiO <sub>2</sub> (20 mg)        | 72%             |
| 2     | 4Å MS (20 mg)                   | 77%             |
| 3     | 3Å MS (20 mg)                   | 70%             |
| 4     | Basic alumina (20 mg)           | 73%             |
| 5     | K <sub>2</sub> CO <sub>3</sub>  | 12%             |
| 6     | Na <sub>2</sub> CO <sub>3</sub> | 17%             |
| 7     | K <sub>2</sub> HPO <sub>4</sub> | 15%             |
| 8     | Cs <sub>2</sub> CO <sub>3</sub> | 21%             |

Reaction conditions: **1a** (0.1 mmol), **2a** (0.2 mmol, 2 equiv.), additive (0.2 mmol, 2 equiv.) in dry DMSO (0.8 mL) under purple Kessil ( $\lambda = 390$  nm) irradiation for 2 h at rt under argon atmosphere.

### 2.3 Optimization of different equivalents of potassium thioacetate

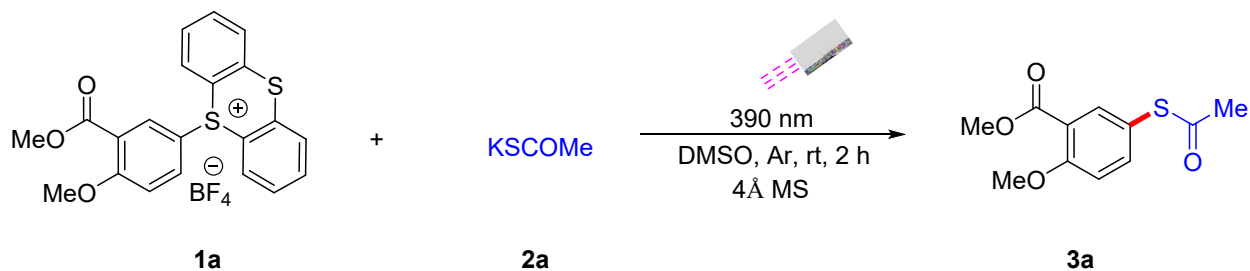

| Entry | <b>1a</b> | <b>2a</b>  | Additive 4Å MS | Isolated Yield (%) |
|-------|-----------|------------|----------------|--------------------|
| 1     | 1 equiv.  | 1 equiv.   | 10 mg          | 57%                |
| 2     | 1 equiv.  | 2. equiv.  | 20 mg          | 77%                |
| 3     | 1 equiv.  | 2.5 equiv. | 25 mg          | 77%                |

Reaction conditions: **1a** (0.1 mmol), **2** (x-equivalent), 4Å MS (x-mg) in dry DMSO (0.8 mL) under purple Kessil ( $\lambda = 390$  nm) irradiation for 2 h at rt under argon atmosphere.

### 2.4 Screening of Light Irradiation

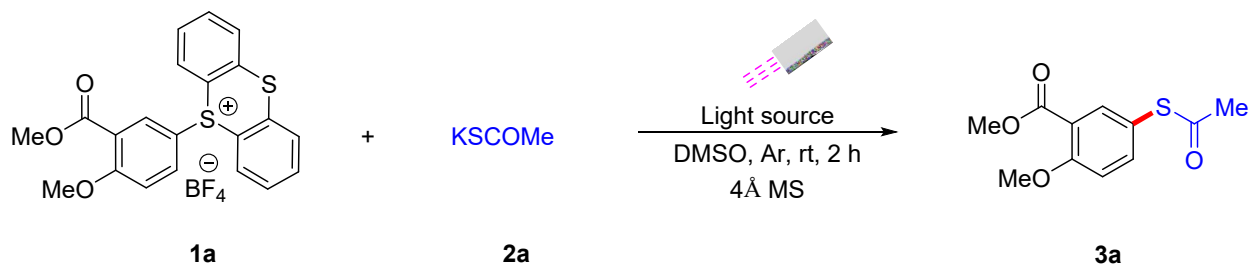

| Entry | Light source         | Isolated Yield <sup>a</sup>  |
|-------|----------------------|------------------------------|
| 1     | 390 nm Purple Kessil | 77%                          |
| 2     | 427 nm Blue Kessil   | <b>85% (83%)<sup>b</sup></b> |
| 3     | 440 nm Blue Kessil   | 62%                          |
| 4     | 456 nm Blue Kessil   | 50%                          |
| 5     | 3W Green LED strips  | trace                        |
| 6     | Dark (no light)      | nr                           |
| 7     | 427 nm Blue Kessil   | 72% <sup>c</sup>             |
| 8     | 427 nm Blue Kessil   | 83% <sup>d</sup>             |

<sup>a</sup>Reaction conditions: **1a** (0.1 mmol), **2** (0.2 mmol, 2-equiv.), 4Å MS (20 mg) in dry DMSO (0.8 mL) under various light source for 2 h at rt under argon atmosphere. <sup>b</sup> **1a** (0.3 mmol), and **2a** (0.6 mmol, 2.0 equiv.), dry DMSO (1.5 mL), 4Å MS (60 mg), 2h; <sup>c</sup>open-to-air, <sup>d</sup> **1a** (0.3 mmol), and **2a** (0.6 mmol, 2.0 equiv.), dry DMSO (1.5 mL), 4Å MS (60 mg), 30 min; nr = no reaction.

### 3. General Procedure and Characterization of Products

#### 3.1 General procedure for the synthesis of aryl sulfonium salts

The aryl sulfonium salts (1a-z) shown in Figure S1 were prepared according to previously described methods in the literature.<sup>1</sup>

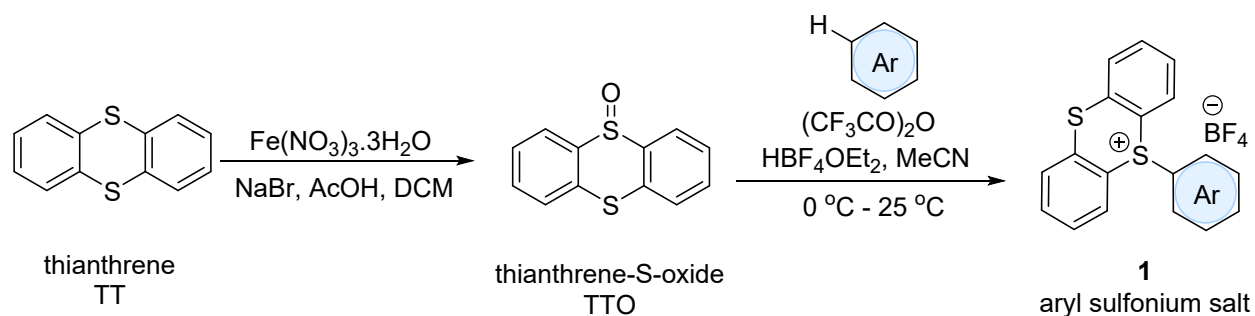

**(step-1) Thianthrene to thianthrene-S-oxide synthesis:**<sup>1</sup> According to the modified procedure, 100 mL round-bottom flask was charged with thianthrene (1.081 g, 5.0 mmol, 1.0 equiv.),  $\text{Fe}(\text{NO}_3)_3 \cdot 9\text{H}_2\text{O}$  (2.02 g, 5.0 mmol, 1.0 equiv.) and NaBr (20 mg, 4.0 mol%). DCM (20.0 mL) and AcOH (0.2 mL). The reaction mixture was stirred at room temperature for 3 h. The reaction mixture was diluted with  $\text{H}_2\text{O}$  (20 mL) and poured into a 125 mL separatory funnel. The aqueous and the organic layer were separated. The aqueous layer was extracted with DCM (ca. 10 mL x 2). The organic layers were combined, dried over  $\text{Na}_2\text{SO}_4$ , filtered, and the solvent was removed under reduced pressure. The resulting solid was recrystallized from EtOAc and dried in vacuo to afford thianthrene-S-oxide.

**(step-2) Thianthrene-S-oxide to aryl sulfonium salt synthesis:**<sup>1</sup>

Under an ambient atmosphere, a 50 mL round-bottom flask was charged with arene (2.0 mmol, 1.0 equiv.) and dry MeCN (5.0 mL). After cooling to  $0\text{ }^\circ\text{C}$ ,  $\text{HBF}_4 \cdot \text{OEt}_2$  (1.5 equiv.) was added to the vial while stirring the reaction mixture. After, thianthrenium-S-oxide (TTO) (2.0 mmol, 1.0 equiv.) was added in one portion to the solution at  $0\text{ }^\circ\text{C}$ , leading to a suspension. Subsequently, trifluoroacetic anhydride (3.0 equiv.) was added in one portion, resulting in a color change to deep purple. The flask was sealed with a septum. The mixture was stirred at  $0\text{ }^\circ\text{C}$  for 1 h, subsequently the reaction mixture was warmed to  $25\text{ }^\circ\text{C}$  and stirred for 12 h. The solution was poured onto a mixture of 10 mL dichloromethane, 10 mL saturated aqueous  $\text{Na}_2\text{CO}_3$  solution, and 10 mL water. After stirring for 5 min, the mixture was poured into a 125 mL separatory funnel, and the layers were separated. The organic layer was washed with aqueous  $\text{NaBF}_4$  solution ( $2 \times$  ca. 10 mL, 5 % w/w) and with water ( $2 \times$  10 mL). Then the organic layer was dried over  $\text{Na}_2\text{SO}_4$ , then filtered and concentrated under reduced pressure. The residue was purified by chromatography on silica gel eluting with DCM/MeOH and purified by precipitation with  $\text{Et}_2\text{O}/\text{DCM}$ , the solid was dried in vacuo to afford the aryl sulfonium salts.

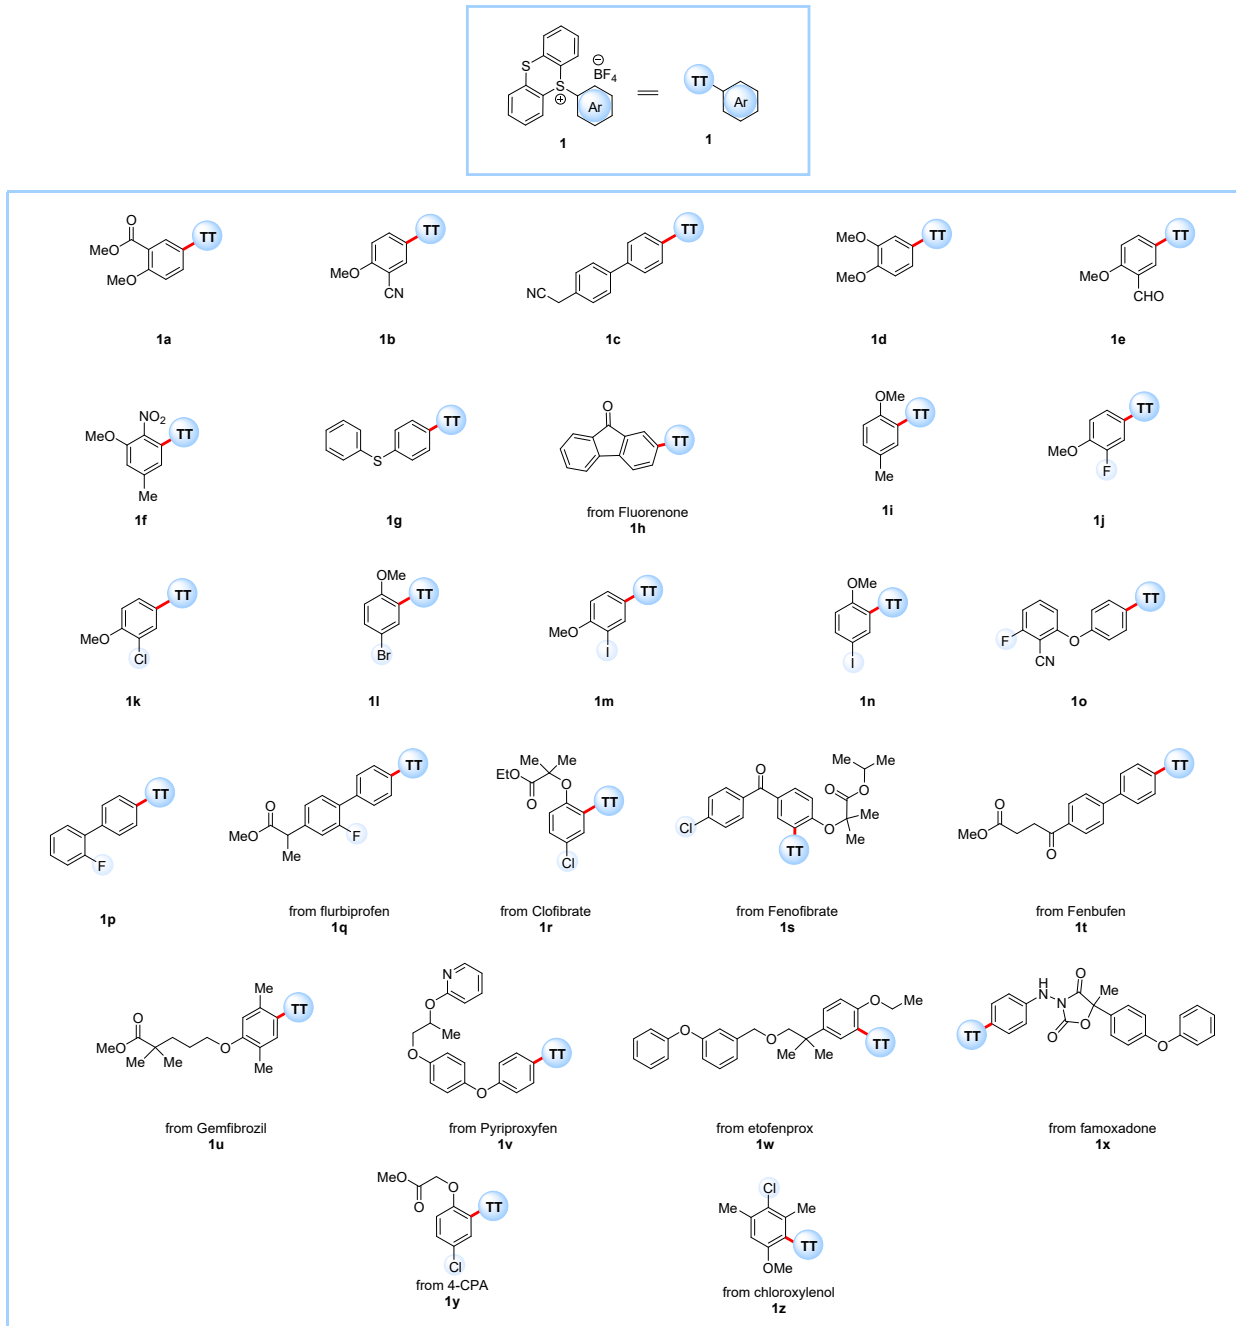

Figure 1. Various aryl sulfonium salts 1a-1z used in this experiment

### 3.2 General procedure for the synthesis of potassium thioacid salts.

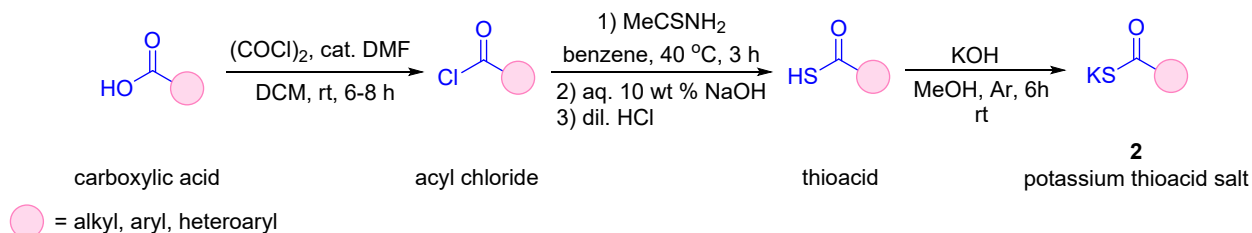

**(step-1) Carboxylic acid to acyl chloride synthesis:** To a oven dried 100 mL round-bottom flask, equipped with a magnetic stirrer, was charged with carboxylic acid (5 mmol), dried DCM (10 mL) followed by addition of catalytic amount of DMF (40  $\mu$ L). The reaction mixture was cooled to 0 °C and stirred for 5 minutes, then oxalyl chloride ( $\text{COCl}_2$ ) (1.2 equiv.) was added dropwise to the reaction mixture and stirred at room temperature for 6-8 h. Later, the resulting reaction mixture was concentrated under reduced pressure to give access to acid chloride quantitatively, which was utilized for the next step directly without further purification.

**(step-2) Acyl chloride to thioacid synthesis:**<sup>2</sup> To the round bottom flask containing acyl chloride mixture, equipped with a magnetic stirrer, was added thioacetamide (5 mmol, 1 equiv.), followed by 20 mL benzene. The reaction flask was sealed with rubber septum, and stirred for 3 h at 40 °C in an oil bath. After completion of the reaction, aqueous solution of 10% NaOH (30 mL) was added and the reaction mixture was stirred for an additional 30 minutes. Thereafter, the reaction mixture was transfer to an 125 mL separation funnel and the aqueous layer was isolated and was acidified by dropwise addition of conc. HCl (to pH: 2). The reaction mixture was then extracted with ethyl acetate (2 x 20 mL) and the combined organic layers was dried over  $\text{Na}_2\text{SO}_4$ . The mixture was concentrated under reduced pressure to afford the required thioacid product, which was used for the next step without further purification.

**(step-3) Thioacid to potassium thioacid salt synthesis:**<sup>3</sup> To a oven dried 25 mL round-bottom flask, equipped with a magnetic stirrer, was charged with thioacid (2 mmol), followed by 10 mL methanol and potassium hydroxide (2 mmol, 1 equiv.). The reaction mixture was stirred under argon atmosphere at room temperature for 6 h. After completion, the solvent was removed under reduced pressure. The crude was the azeotropically dried with 10 mL benzene. This procedure was repeated 3 times and the desired product was used for the photochemical reaction without further purification.



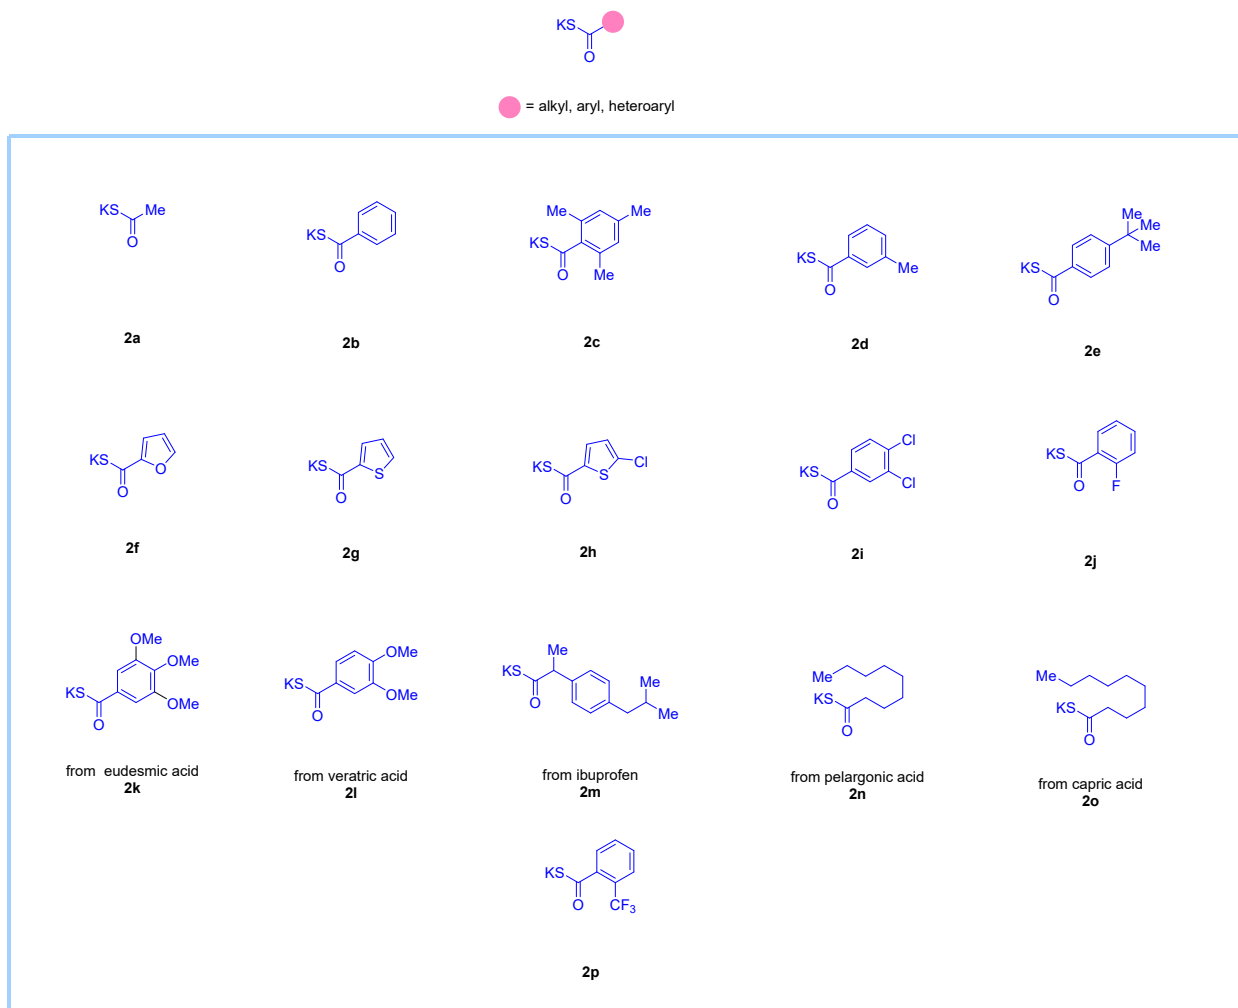

**Figure 2.** Various potassium thioacids **2a-2p** used in this experiment

Compound **2a** was purchased from local suppliers.

Compound **2b** was synthesis from corresponding thiobenzoic acid *via* **step-3**.

Compounds **2c-2e** was synthesis from corresponding acyl chlorides from **step-2**.

Compounds **2f-2p** was synthesis from corresponding carboxylic acids from **step-1**.

### 3.3 General procedure-A for the synthesis of aryl thioester using potassium thioacetate.

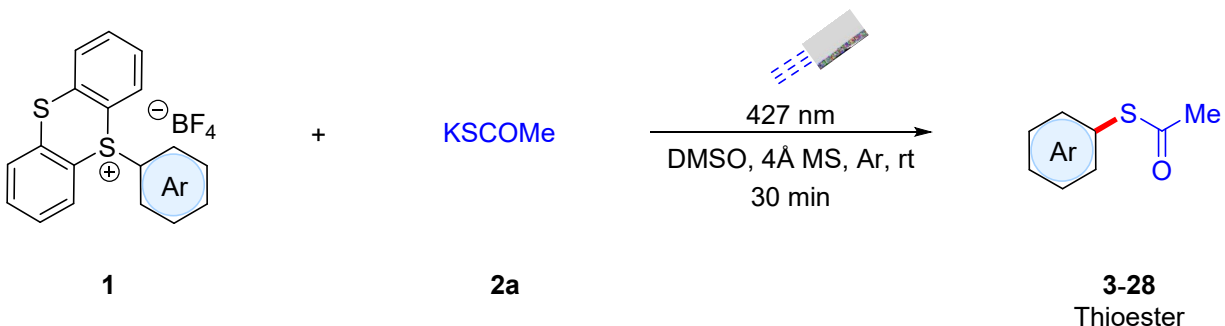

To a glass vial, charged with magnetic stir bar was added aryl thianthrenium salt **1** (0.3 mmol), potassium thioacetate **2a** (69 mg, 0.6 mmol, 2 equiv.), 60 mg 4Å MS and 1.5 mL dry DMSO. The glass vial was closed with septum and covered with Parafilm. The glass vial was purged with argon for 10 min. and placed in the reaction setup. The reaction was irradiated for 30 min (unless otherwise stated) with 40W Kessil lamp ( $\lambda_{\text{max}} = 427\text{ nm}$ , placed at a distance of 3 cm). After the completion of the reaction, the reaction was quenched with brine solution and the mixture was extracted with ethyl acetate. The combined organic layer was washed with H<sub>2</sub>O, and then dried over anhydrous Na<sub>2</sub>SO<sub>4</sub>, and concentrated under reduced pressure. The residue was purified by column chromatography on silica gel eluting with hexane/ethyl acetate to afford the corresponding desired thioester product.

### 3.4 General procedure-B for the synthesis of aryl thioester using different potassium thioacid salts.

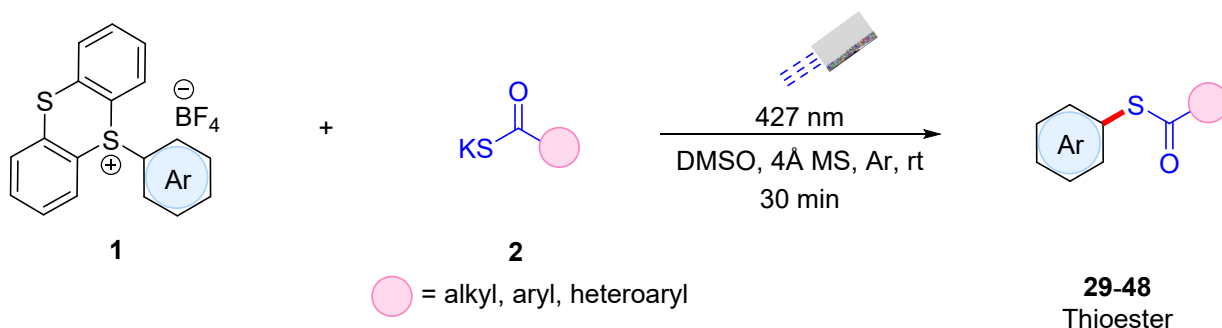

To a glass vial, charged with magnetic stir bar was added aryl thianthrenium salt **1** (0.3 mmol), potassium thioacid **2** (0.6 mmol, 2 equiv.), 60 mg 4Å MS and 1.5 mL dry DMSO. The glass vial was closed with septum and covered with Parafilm. The glass vial was purged with argon for 10 min. and placed in the reaction setup. The reaction was irradiated for 30 min (unless otherwise stated) with 40W Kessil lamp ( $\lambda_{\text{max}} = 427\text{ nm}$ , placed at a distance of 3 cm). After the completion of the reaction, the reaction was quenched with brine solution and the mixture was extracted with ethyl acetate. The combined organic layer was washed with saturated solution of NaHCO<sub>3</sub> (10 mL x2) and with H<sub>2</sub>O (10 mL x2). Then, the

organic layer was dried over anhydrous  $\text{Na}_2\text{SO}_4$ , and concentrated under reduced pressure. The residue was purified by column chromatography on silica gel eluting with hexane/ethyl acetate to afford the corresponding desired thioester product.

### 3.5. Unsuitable substrates

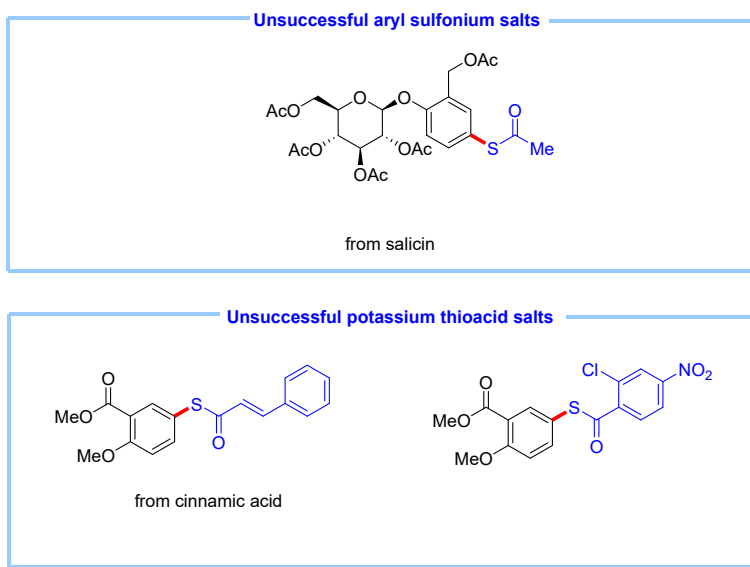

**Figure 3.** Unsuitable substrates

## 4. Mechanistic studies

### 4.1 UV-visible absorption spectra

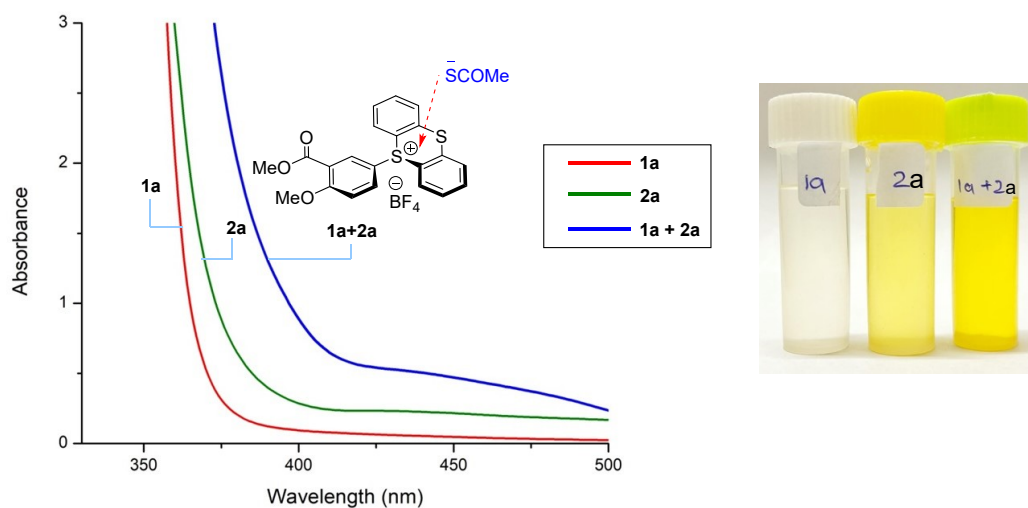

**Figure 4:** UV-visible spectra experiments measured in DMSO and visual appearance of individual components and reaction mixture.

UV/vis absorption spectra were recorded using Shimadzu UV-Vis 2600 spectrophotometer in the range of 200-800 nm in a 1 cm quartz cuvette. The UV/vis absorption spectra of the individual components and reaction mixture were thereof measured. A clear bathochromic shift was observed (blue band) of the reaction mixture (**1a** + **2a**) in DMSO, which clearly indicates the formation of an electron donor-acceptor (EDA) complex. Moreover, the images show a clear transparent color of methyl-2-methoxybenzoate-derived thianthrenium tetrafluoroborate **1a**, a pale yellow color of potassium thioacetate **2a**, and an intense yellow color of the reaction mixture (**1a** + **2a**) in dried DMSO, which further speculate the formation of an EDA-complex aggregate.

## 4.2 Job's plot

The absorbance values at 427 nm were monitored and plotted as a function of molar fraction of methyl-2-methoxybenzoate-derived thianthrenium tetrafluoroborate **1a**, and potassium thioacetate **2a** in DMSO. A parabolic curve with a maximum absorbance value at 50% mol fraction was obtained, indicating a 1:1 EDA complex between **1a** and potassium thioacetate **2a**.

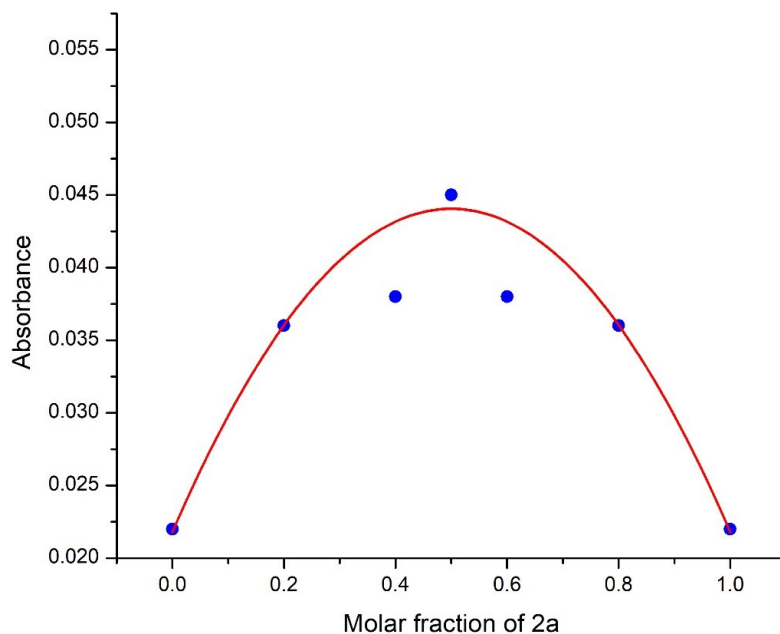

## 4.3. <sup>1</sup>H-NMR titration experiment

<sup>1</sup>H NMR spectra of mixtures of methyl-2-methoxybenzoate-derived thianthrenium tetrafluoroborate **1a** and potassium thioacetate **2a** in DMSO-*d*<sub>6</sub> were recorded at 300 K. In an NMR tube, the total volume of the mixture was 0.6 mL, the concentration of methyl-2-methoxybenzoate-derived thianthrenium

tetrafluoroborate **1a** (0.03 mmol) was kept constant at 0.05 M, and that of potassium thioacetate **2a** was varied from 0 to 1.5 M. The molar ratios of methyl-2-methoxybenzoate-derived thianthrenium tetrafluoroborate **1a**: potassium thioacetate **2a** were 1:0, 1:1, 1:3, 1:9, 1:12 in DMSO- $d_6$ . The  $^1\text{H}$  NMR signal of C1-H in methyl-2-methoxybenzoate-derived thianthrenium tetrafluoroborate **1a** shifted downfield along with increasing the amount of potassium thioacetate **2a**, while C4-H, C3-H, C2-H, and C5-H shifted upfield,<sup>4</sup> indicating the formation of EDA complex between methyl-2-methoxybenzoate-derived thianthrenium tetrafluoroborate **1a** with potassium thioacetate **2a**.

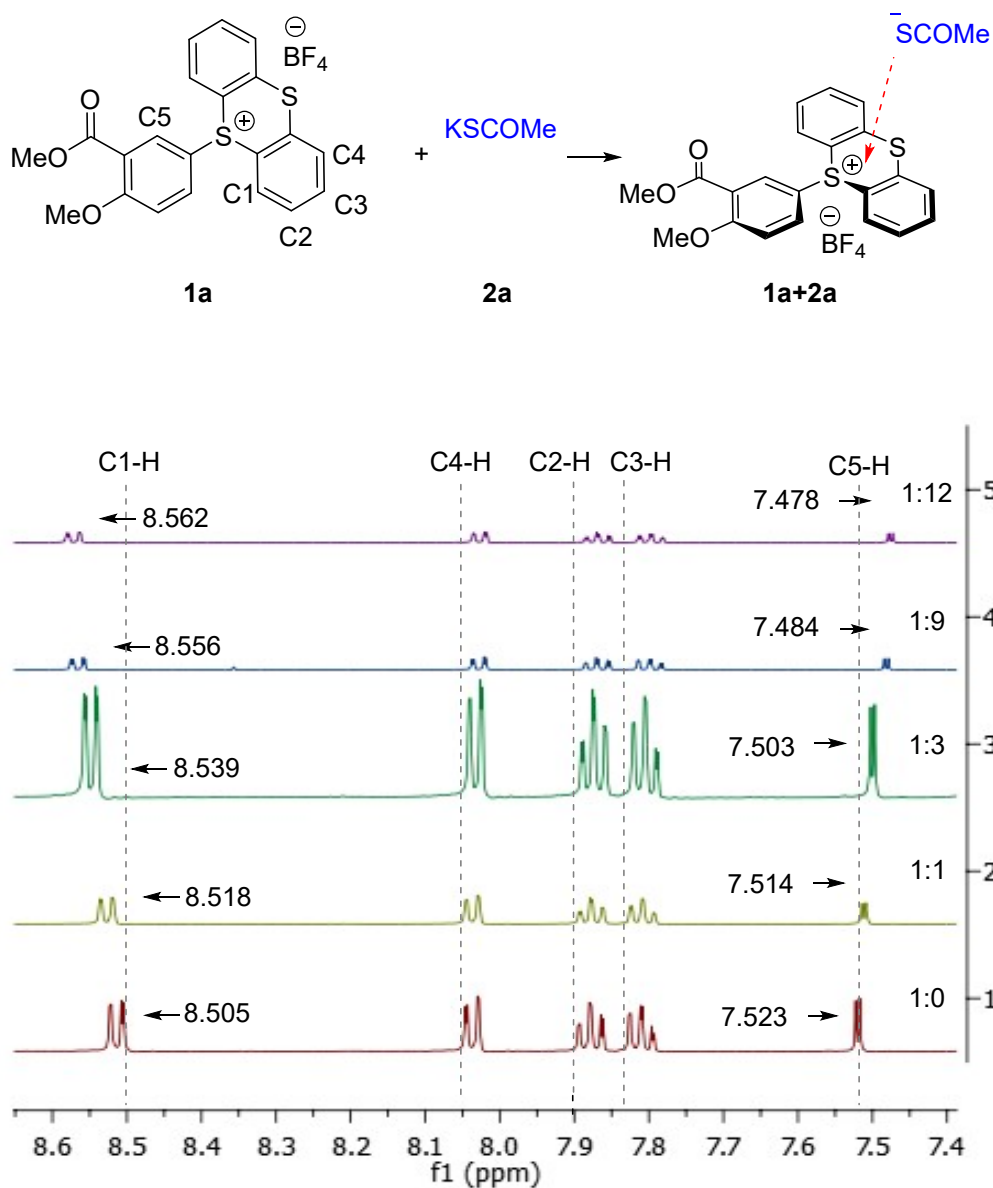

**Figure 5:**  $^1\text{H}$ -NMR shift of methyl-2-methoxybenzoate-derived thianthrenium tetrafluoroborate **1** with potassium thioacetate **2a**

## 4.4 Radical Trapping Experiments

To a glass vial, charged with magnetic stir bar was added methyl-2-methoxybenzoate-derived thianthrenium tetrafluoroborate **1a** (140 mg, 0.3 mmol), potassium thioacetate **2a** (69 mg, 0.6 mmol, 2.0 equiv.), TEMPO (141 mg, 0.9 mmol, 3.0 equiv), 60 mg 4Å MS. Then, dry DMSO (1.5 mL) was added and glass vial was closed with rubber septum. The glass vial was then purged with argon for 10 min, and reaction was stirred and irradiated with a 427 nm Kessil LED lamp (approximately 3 cm away from the light source) at room temperature for 30 min. The reaction was completely quenched and product **3a** was obtained in trace amount. Furthermore, the TEMPO-adduct was detected by HRMS. The TEMPO-adduct indicates the formation of an aryl radical intermediate in the reaction.

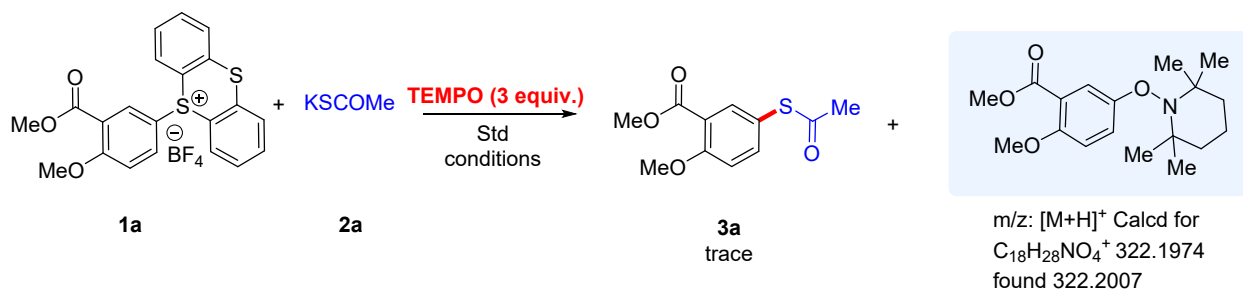

**Scheme 1.** Radical trapping experiment with TEMPO

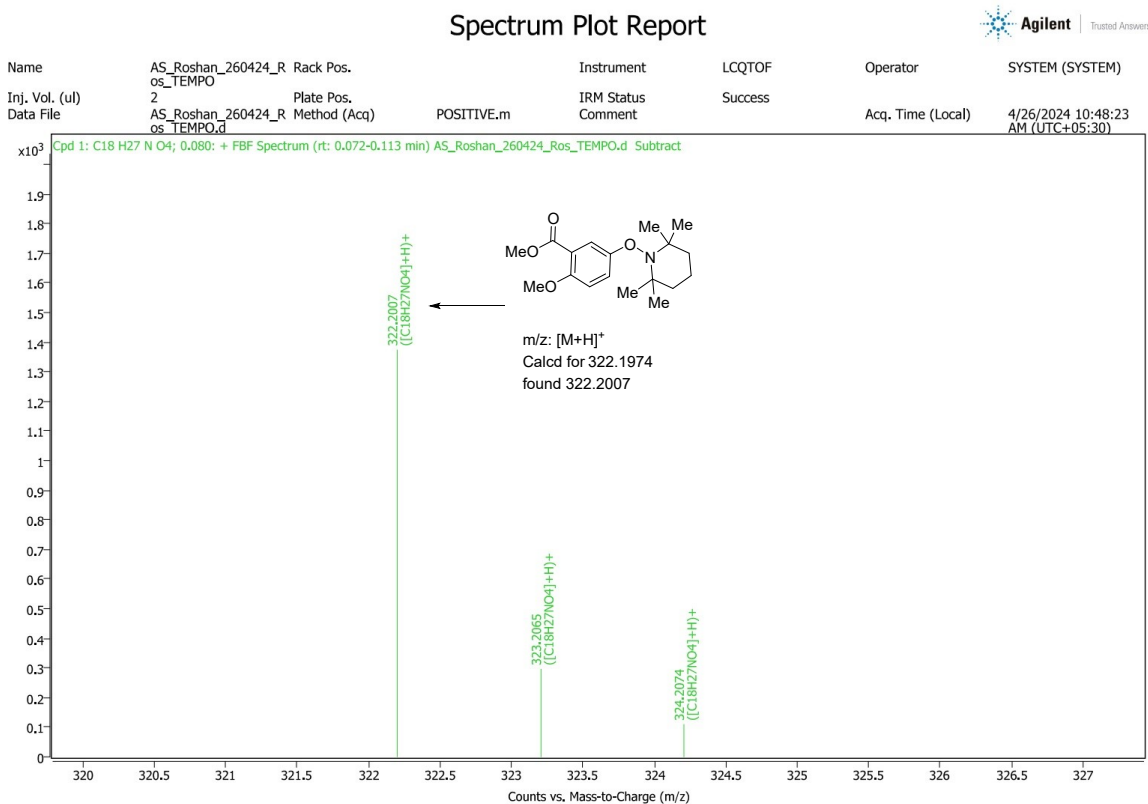

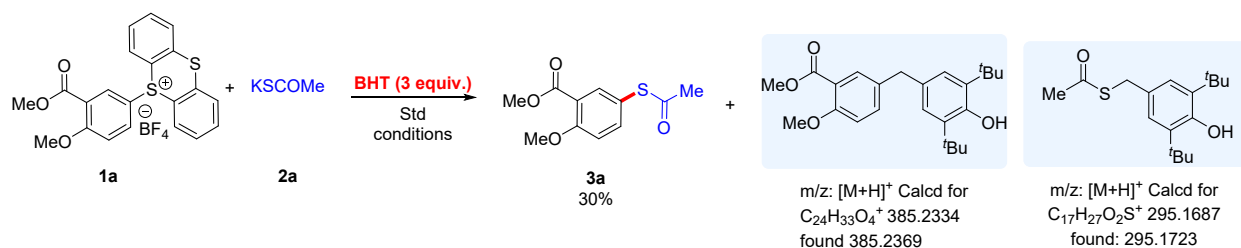

**Scheme 2.** Radical trapping experiment with BHT

To a glass vial, charged with magnetic stir bar was added methyl-2-methoxybenzoate-derived thianthrenium tetrafluoroborate **1a** (140 mg, 0.3 mmol), potassium thioacetate **2** (69 mg, 0.6 mmol, 2.0 equiv.), BHT (193 mg, 0.9 mmol, 3.0 equiv), 60 mg Å MS. Then, dry DMSO (1.5 mL) was added and glass vial was closed with rubber septum. The glass vial was then purged with argon for 10 min, and reaction was stirred and irradiated with a 427 nm Kessil LED lamp (approximately 3 cm away from the light source) at room temperature for 30 min. The reaction was completely quenched and product **3a** was obtained in 30% yield and the BHT-adducts was detected by HRMS. The BHT-adducts indicates the formation of an aryl radical intermediate as well as thiyl radical intermediate in the photochemical transformation.

## Spectrum Plot Report

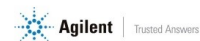

| Name           | AS_Roshan_030524_P<br>2_Ros-497b   | Rack Pos.    | Instrument | LCQTOF  | Operator          | SYSTEM (SYSTEM)     |
|----------------|------------------------------------|--------------|------------|---------|-------------------|---------------------|
| Inj. Vol. (ul) | 2                                  | Plate Pos.   | IRM Status | Success | Acq. Time (Local) | 5/3/2024 4:36:14 PM |
| Data File      | AS_Roshan_030524_P<br>2_Ros-497b.d | Method (Acq) | Comment    | Repeat  |                   | (UTC+05:30)         |

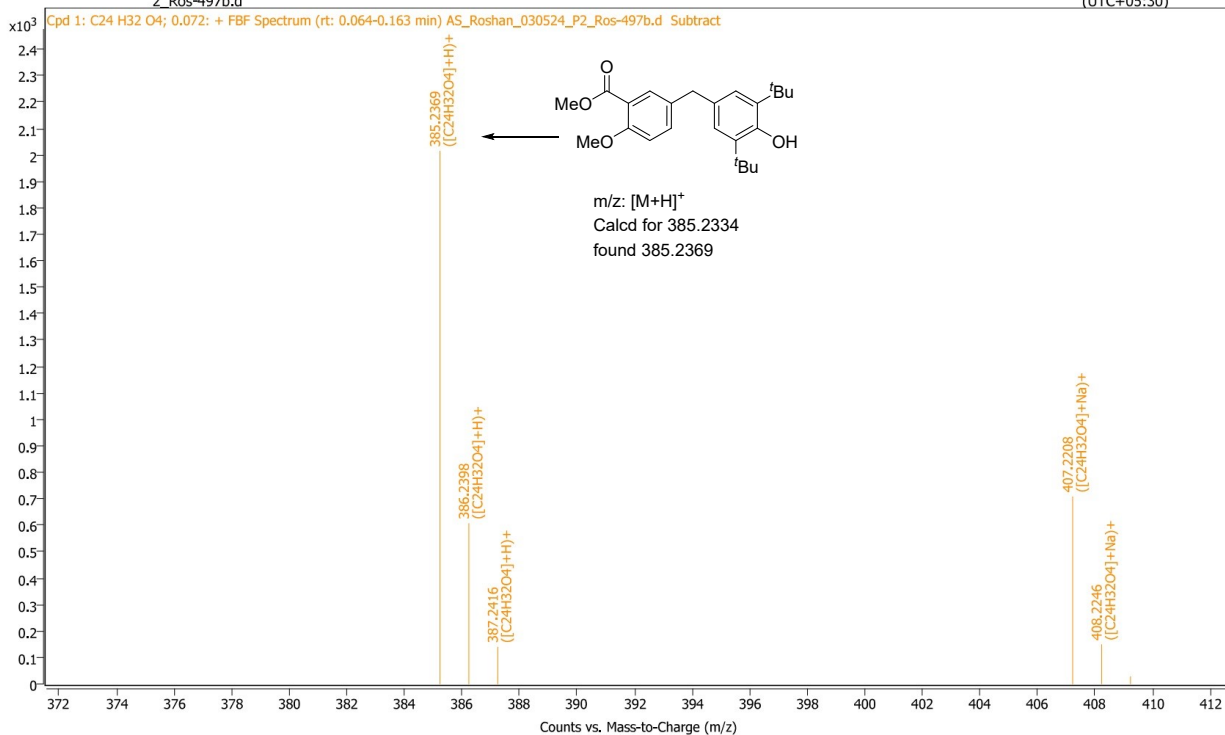

# Spectrum Plot Report

|                |                                                      |            |            |                   |                                  |
|----------------|------------------------------------------------------|------------|------------|-------------------|----------------------------------|
| Name           | AS_Roshan_030524_R Rack Pos. os-497b                 | Instrument | LCQTOF     | Operator          | SYSTEM (SYSTEM)                  |
| Inj. Vol. (ul) | 2                                                    | IRM Status | Success    | Acq. Time (Local) | 5/3/2024 12:37:43 PM (UTC+05:30) |
| Data File      | AS_Roshan_030524_R Plate Pos. os-497b.d Method (Acq) | Comment    | POSITIVE.m |                   |                                  |

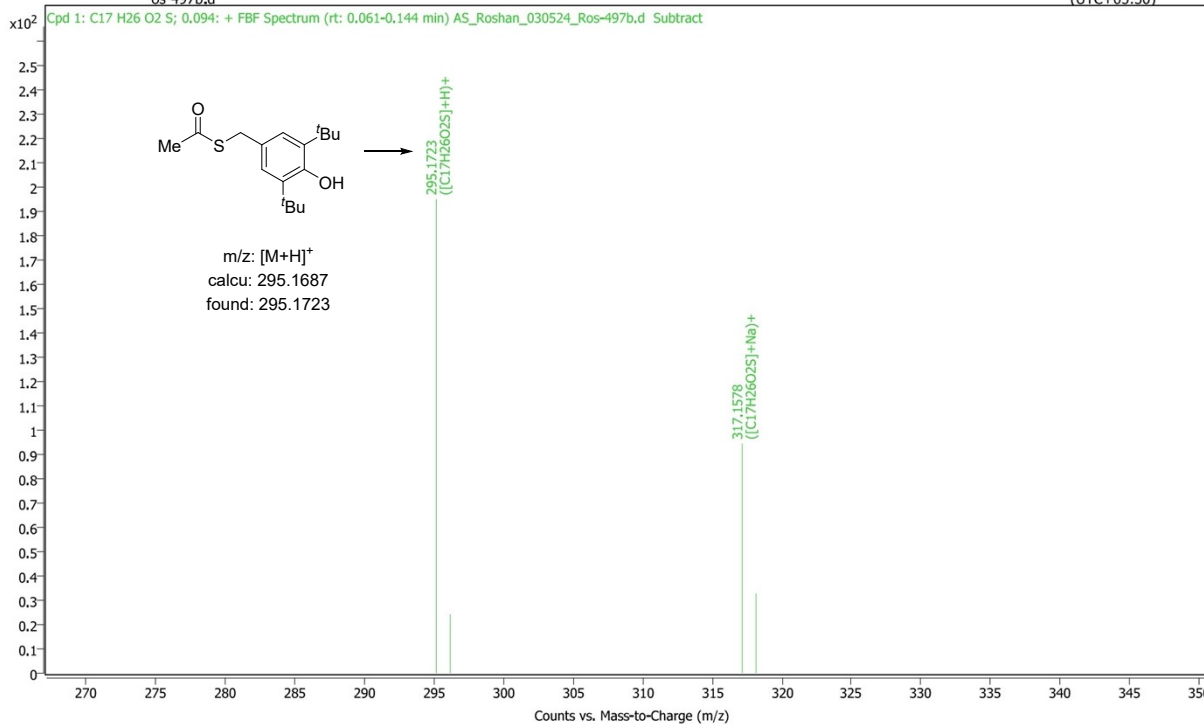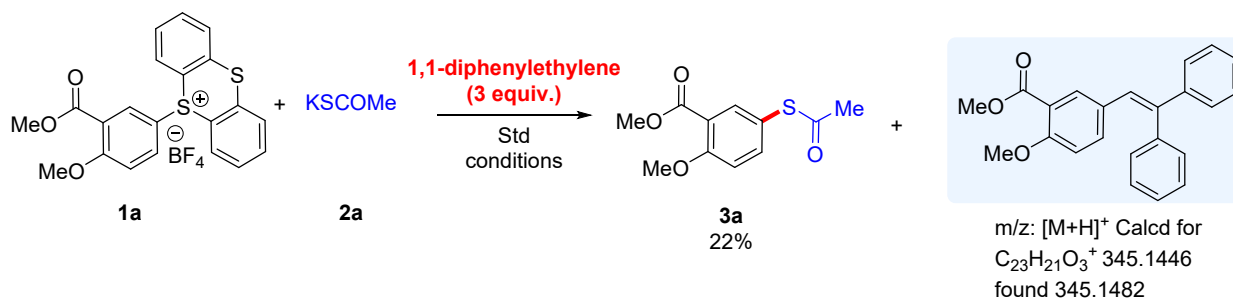

### Scheme 3. Radical trapping experiment with 1,1-diphenylethylene

To a glass vial, charged with magnetic stir bar was added methyl-2-methoxybenzoate-derived thianthrenium tetrafluoroborate **1a** (140 mg, 0.3 mmol), potassium thioacetate **2** (69 mg, 0.6 mmol, 2.0 equiv.), 1,1-diphenylethylene (162 mg, 0.9 mmol, 3.0 equiv.), 60 mg 4 Å MS. Then, dry DMSO (1.5 mL) was added and glass vial was closed with rubber septum. The glass vial was then purged with argon for 10 min, and reaction was stirred and irradiated with a 427 nm Kessil LED lamp (approximately 3 cm away from the light source) at room temperature for 30 min. The reaction was completely quenched and product **3a** was isolated in 22% yield and the 1,1-diphenylethylene-adduct was detected by HRMS.



# Spectrum Plot Report

|                |                                                 |            |         |                   |                     |
|----------------|-------------------------------------------------|------------|---------|-------------------|---------------------|
| Name           | AS_Roshan_030524_P Rack Pos.<br>2_Ros-498P      | Instrument | LCQTOF  | Operator          | SYSTEM (SYSTEM)     |
| Inj. Vol. (ul) | 2                                               | IRM Status | Success | Acq. Time (Local) | 5/3/2024 4:38:56 PM |
| Data File      | AS_Roshan_030524_P Method (Acq)<br>2_Ros-498P.d | Comment    | Repeat  |                   | (UTC+05:30)         |

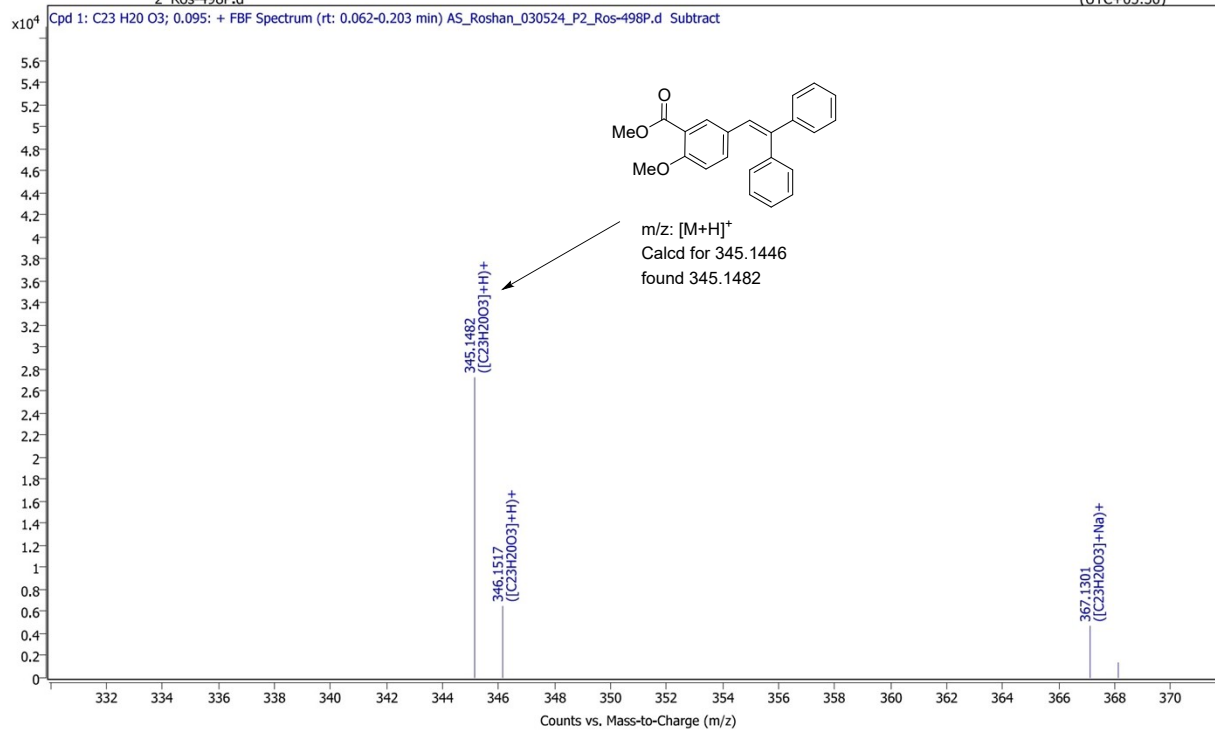

## 4.5 Natural sunlight irradiation

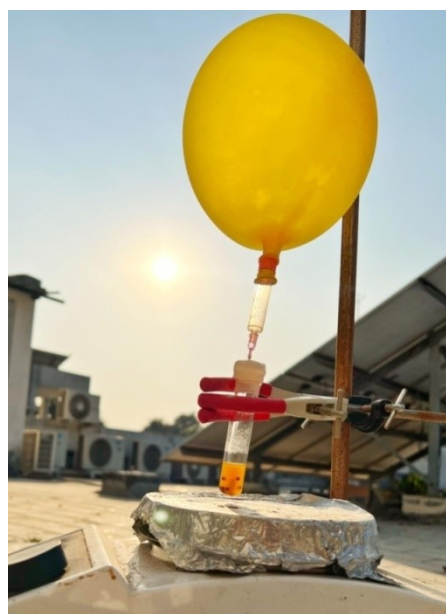

Reaction setup under sunlight

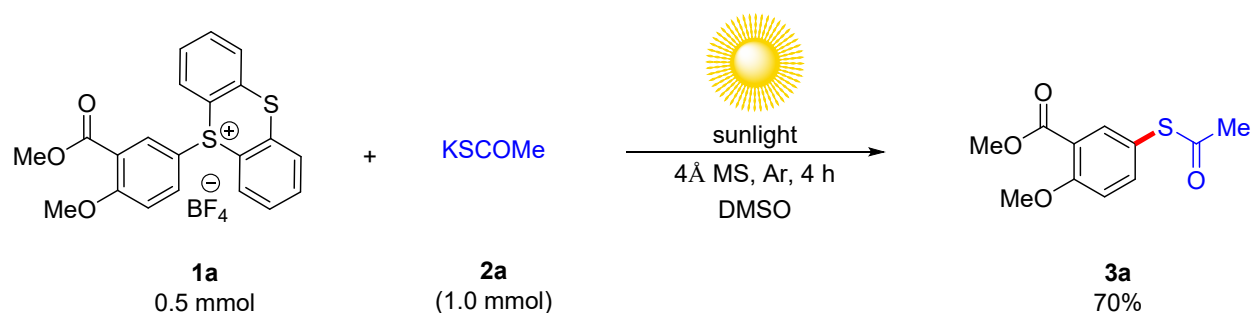

To a glass vial, charged with magnetic stir bar was added methyl-2-methoxybenzoate-derived thianthrenium tetrafluoroborate **1a** (234.1 mg, 0.5 mmol), potassium thioacetate **2** (114.2 mg, 1.0 mmol, 2.0 equiv.), 100 mg 4Å MS. Then, dry DMSO (2.0 mL) was added and glass vial was closed with rubber septum. The glass vial was then purged with argon for 10 min. Then the reaction was carried out under natural sunlight for 4 h (from 11:00 am to 15:00 pm, 09/12/2023, Roorkee, IIT Roorkee, Uttarakhand, India, Temperature 21 °C -24 °C, location: 29°51'45''N 77°53'46''E). After the completion of the reaction, the reaction was quenched with brine solution and the mixture was extracted with ethyl acetate. The combined organic layer was washed with H<sub>2</sub>O, and then dried over anhydrous Na<sub>2</sub>SO<sub>4</sub>, and concentrated under reduced pressure. The residue was purified by column chromatography on silica gel eluting with hexane/ethyl acetate to afford the corresponding desired methyl 5-(acetylthio)-2-methoxybenzoate product **3a** in 70% yield (84 mg).

#### 4.6. Quantum Yield ( $\Phi$ )

A ferrioxalate actinometer solution was prepared following the Hammond variation of the Hatchard and Parker procedure<sup>5</sup> outlined in the Handbook of Photochemistry.<sup>6</sup> Ferrioxalate actinometer solution measures the decomposition of ferric ions to ferrous ions, which are complexed by 1,10-phenanthroline and monitored by UV/Vis absorbance at 510 nm. The moles of iron-phenanthroline complex formed are related to moles of photons absorbed. The values of the quantum yield of potassium ferrioxalate are related to the concentration and wavelength.

The solutions were prepared and the flask was covered with aluminum foil:

1. Potassium ferrioxalate solution 0.012 M: Potassium ferrioxalate (147.4 mg) and 69.5  $\mu$ L of sulfuric acid (96%) were added to a 25 mL volumetric flask and filled to the mark with water.
2. Phenanthroline solution: 0.2% by weight of 1,10-phenanthroline in water (50 mg in 25 mL).
3. Buffer solution: to a 100 mL volumetric flask, 4.94 g of NaOAc and 1.0 mL of sulfuric acid (96%) were added and filled to the mark with water.

A cuvette was loaded with 1.0 mL of potassium ferrioxalate solution and placed under 40W Kessil lamp (427 nm). The actinometer solution was irradiated for 90 s. After the irradiation, the actinometer

solution was carefully transferred into a 10 mL volumetric flask, then 0.5 mL of phenanthroline solution and 2.0 mL of buffer solution was added and the flask was filled up with water. The absorbance of the final solution was measured at 510 nm. A non-irradiated sample was also prepared and the absorbance at 510 nm was measured.

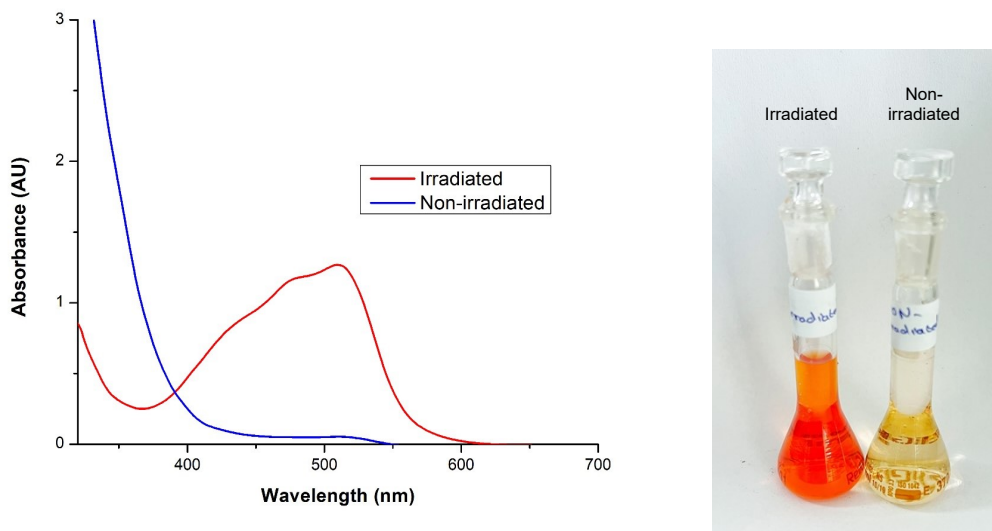

**Figure 6.** Absorption spectra for irradiated and non-irradiated samples of red  $[\text{Fe}(\text{phen})_3]^{+2}$

The moles of  $\text{Fe}^{2+}$  formed for the sample was determined using Beer's Law (Eq. 1):

$$\text{mol}(\text{Fe}^{+2}) = \frac{V1 \cdot V3 \cdot \Delta A(510 \text{ nm})}{10^3 \cdot V2 \cdot l \cdot \epsilon(510 \text{ nm})} \quad (4)$$

where  $V1$  is the irradiated volume (1 mL),  $V2$  is the aliquot of the irradiated solution taken for the determination of the ferrous ions (1 mL),  $V3$  is the final volume after complexation with phenanthroline (10 mL),  $l$  is the optical path-length of the irradiation cell (1 cm),  $\Delta A(510 \text{ nm})$  is the optical difference in absorbance between the irradiated solution and non-irradiated solution,  $\epsilon(510 \text{ nm})$  is the extinction coefficient the complex  $\text{Fe}(\text{phen})_3^{2+}$  at 510 nm ( $11100 \text{ L mol}^{-1} \text{ cm}^{-1}$ ).

$$\text{mol}(\text{Fe}^{+2}) = \frac{1 \text{ mL} \cdot 10 \text{ mL} \cdot 1.215}{10^3 \cdot 1 \text{ mL} \cdot 1 \text{ cm} \cdot 11100 \text{ L mol}^{-1} \text{ cm}^{-1}} = 1.094 \times 10^{-6}$$

fraction of light absorbed at 427 nm for the ferrioxalate solution are calculated by eq. 2

$$f = 1 - 10^{-A} \quad (2)$$

Absorption of ferrioxalate solution at 427 nm = 0.783

$$f = 1 - 10^{-0.783}$$

$$f = 0.835$$

The photon flux can be calculated using eq 3.

$$\text{Photon flux} = \frac{\text{mol } Fe^{+2}}{\Phi (Fe^{+2}) \cdot t \cdot f} \quad (3)$$

$\Phi (\lambda)$  = The quantum yield for  $Fe^{2+}$  formation at 427 nm is 1.11<sup>7</sup>  
 $t = 90 \text{ s}$

$$\text{Photon flux} = \frac{1.094 \times 10^{-6}}{1.11 \cdot 90 \text{ s} \cdot 0.835} = 1.31 \times 10^{-8} \text{ einstein s}^{-1} \quad (3)$$

### Quantum yield determination of photochemical reaction

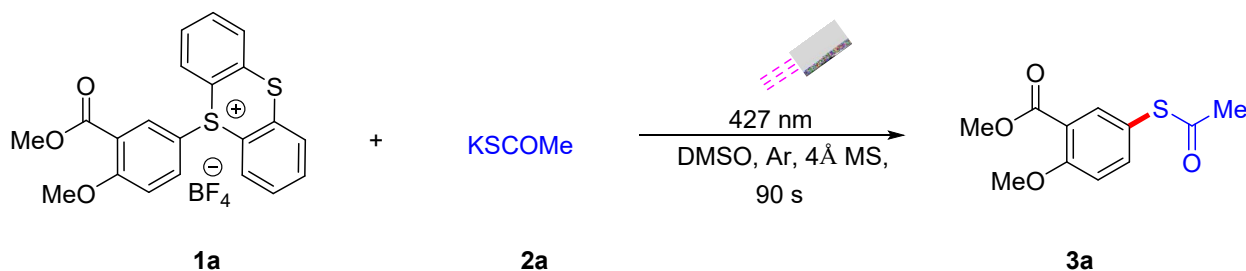

The reaction was performed under standard conditions with 90 second light irradiation, and the reaction produced  $5 \times 10^{-5}$  of the thioester product **3a**.

Therefore, the quantum yield of the reaction is determined to be:

$$\text{Quantum yield (reaction at 427 nm)} = \frac{\text{mol of formed product}}{\text{mol of photon flux} \cdot t \cdot f} \quad (1)$$

Fraction of light absorbed at 427 nm for the photocatalytic reaction  $f = 1 - 10^{-A}$

$A$  = Absorption of photocatalytic reaction (1.575)

$$f = 1 - 10^{-1.575}$$

$$f = 0.97$$

$$\text{Quantum yield (reaction at 427 nm)} = \frac{5.0 \times 10^{-5} \text{ mol}}{1.31 \times 10^{-8} \text{ einstein s}^{-1} \cdot 90 \text{ s} \cdot 0.973} = 44 \quad (1)$$

The quantum yield studies indicate that this is a radical-chain process as evidenced by the  $\Phi$  value.

#### 4.7. Sensitivity assessment of reaction

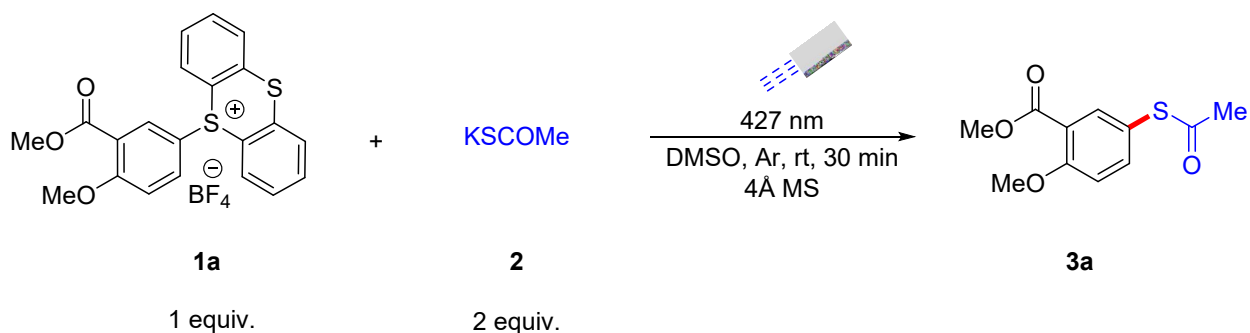

**Table 1. Preparation of sensitivity assessment of reaction**

| Entry | Parameter                 | Variation                                                           | Description                                      | Yield <sup>a</sup> |
|-------|---------------------------|---------------------------------------------------------------------|--------------------------------------------------|--------------------|
| 1     | High concentration (+10%) | $c + 10\% c$                                                        | 1.35 mL DMSO                                     | 83%                |
| 2     | Low concentration (-10%)  | $c - 10\% c$                                                        | 1.65 mL DMSO                                     | 81%                |
| 3     | High H <sub>2</sub> O     | +H <sub>2</sub> O;<br>$V_{\text{H}_2\text{O}} = 1\% V_{\text{rxn}}$ | 10 $\mu\text{L}$ H <sub>2</sub> O in 1.5 mL DMSO | 46%                |
| 4     | O <sub>2</sub> level      | O <sub>2</sub> balloon                                              | O <sub>2</sub> balloon instead of Ar             | 64%                |
| 5     | Low temperature ( $T$ )   | $T - 10 \text{ }^\circ\text{C}$                                     | 15 $^\circ\text{C}$                              | 77%                |
| 6     | High temperature ( $T$ )  | $T + 10 \text{ }^\circ\text{C}$                                     | cooling fan turned off                           | 83%                |
| 7     | Low intensity ( $W$ )     | $d \cdot 4$                                                         | Distance: 12 cm                                  | 70%                |
| 8     | High intensity ( $W$ )    | $d / 4$                                                             | Distance: 0.75 cm                                | 82%                |
| 9     | Big Scale                 | n.20                                                                | 6 mmol of <b>1a</b>                              | 48%                |

<sup>a</sup> Isolated yield.

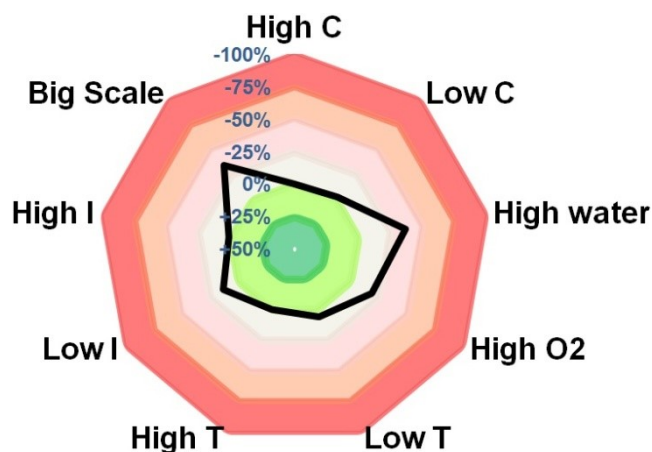

**Figure 7:** Sensitivity assessment of reaction towards concentration, water, oxygen, temperature, light intensity and large scale, is represented by a color-coded radar diagram. Deviation from standard reaction conditions is indicated by a black solid line.

#### 4.8. Scale-up and recyclability of sulfonium salt

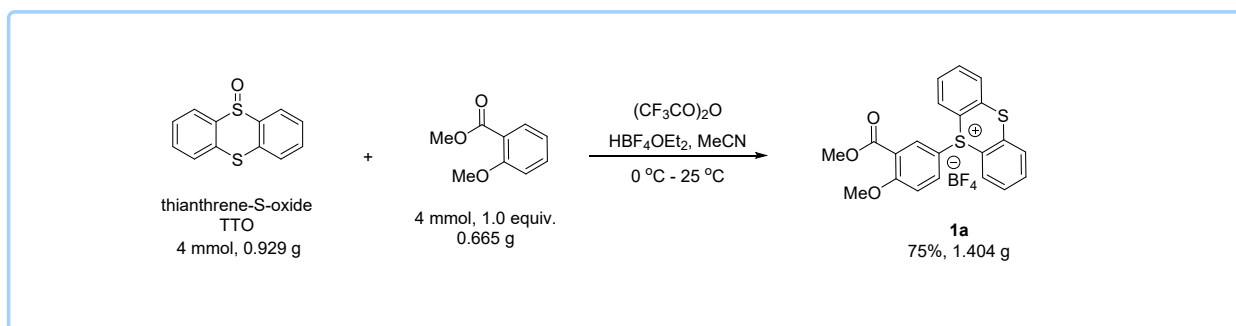

Synthesis of **1a**: The compound methyl-2-methoxybenzoate-derived thianthrenium tetrafluoroborate **1a**, was synthesized according general procedure 3.1, starting from thianthrene-S-oxide (0.929 g, 4 mmol) to yield the required compound **1a** in 75% yield (1.404 g), which was used for the photochemical scale-up reaction.

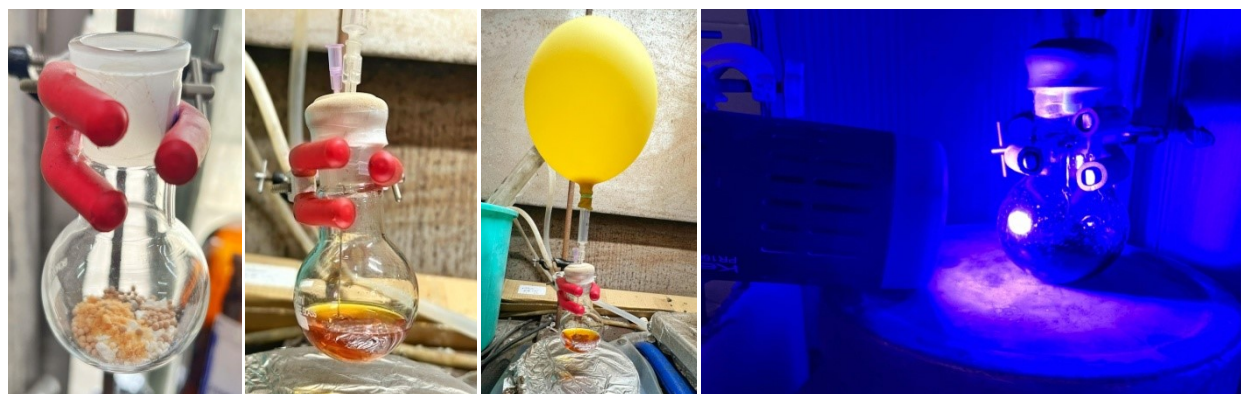

**Figure 8.** Gram scale synthesis reaction of compound **3a**.

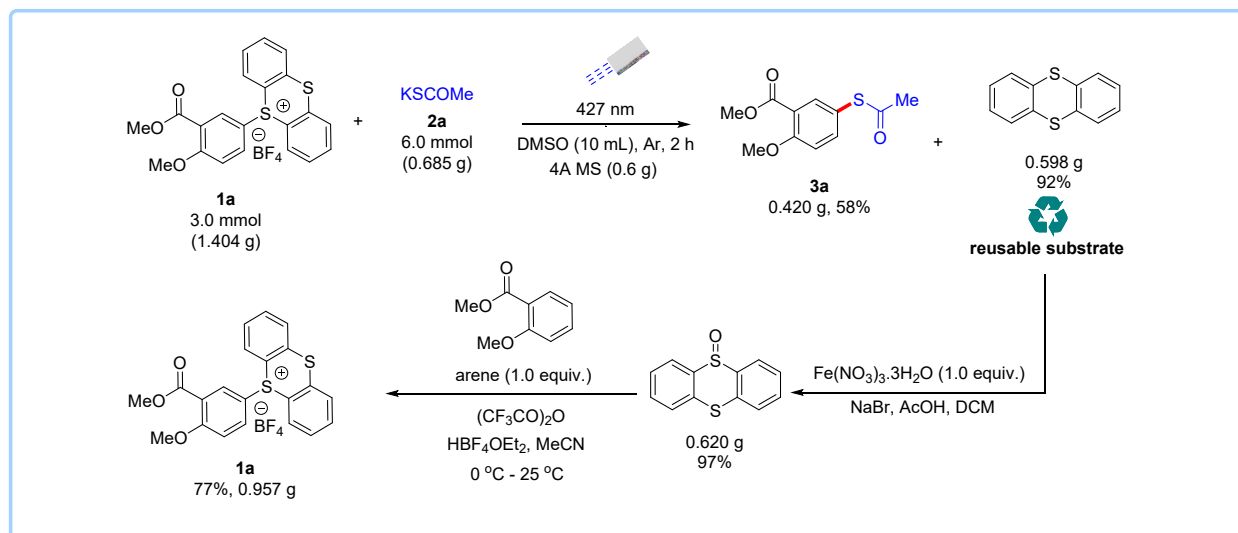

To a 25 mL round bottom flask equipped with a magnetic stir bar was added methyl-2-methoxybenzoate-derived sulfonium salt **1a** (1.404 g, 3.0 mmol), potassium thioacetate **2a** (0.685 g, 6.0 mmol, 2.0 equiv.), and 4Å molecular sieves (0.6 g). The flask was then charged with DMSO (10 mL) and was closed with a septum. The reaction mixture was purged with argon for 15 min and was irradiated for 2 h with a 40W Kessil LED lamp ( $\lambda_{\text{max}} = 427 \text{ nm}$ ) with the temperature maintained by a fan. After irradiation, the mixture was quenched with brine solution, poured into a 250 mL separatory funnel, and extracted with EtOAc (20 mL x 3). The combined organic layer was washed with H<sub>2</sub>O (20 mL x 3), and then dried over anhydrous Na<sub>2</sub>SO<sub>4</sub>, and concentrated under reduced pressure. The crude product was purified using column chromatography on silica gel, eluting with a hexane/ethyl acetate mixture, to yield methyl 5-(acetylthio)-2-methoxybenzoate **3a** at 58% yield (0.420 g). Moreover, thianthrene by-product was recovered in 92% yield (0.598 g).

To demonstrate the recyclability of thianthrene by-product, the recovered thianthrene (TT) is oxidized according to general procedure 3.1 to afford the thianthrene-S-oxide product in 97% yield (0.620 g). This

thianthrene-S-oxide is further converted to the required methyl-2-methoxybenzoate-derived sulfonium salt **1a** in 77% yield (0.957 g).

#### 4.9. Calculations of Green Chemistry Metrics

##### (a) Procedure for the synthesis of compound **3a**

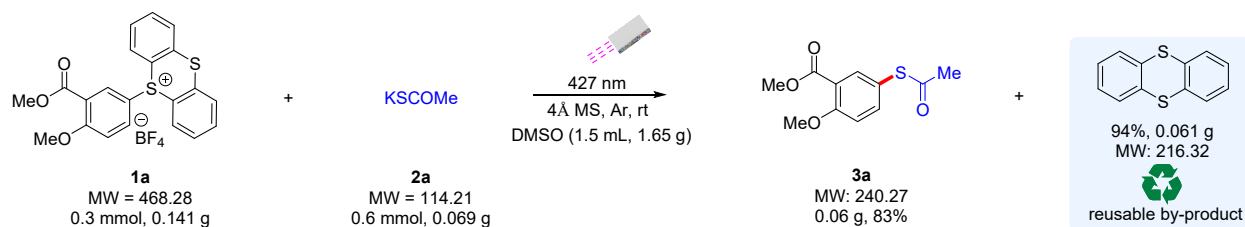

To a glass vial, charged with magnetic stir bar was added methyl-2-methoxybenzoate-derived sulfonium salt **1a** (0.141 g, 0.3 mmol), potassium thioacetate **2** (0.069 g, 0.6 mmol, 2 equiv.), 0.06 g 4 Å MS and dried DMSO (1.65 g, 1.5 mL). The glass vial was closed with septum and covered with Parafilm. The glass vial was then purged with argon for 10 min. The reaction was irradiated for 30 min with 40W Kessil lamp ( $\lambda_{\text{max}} = 427\text{nm}$ ). After the completion of the reaction, the reaction was quenched with brine solution and the mixture was extracted with ethyl acetate. The combined organic layer was washed with H<sub>2</sub>O, and then dried over anhydrous Na<sub>2</sub>SO<sub>4</sub>, and concentrated under reduced pressure. The residue was purified by column chromatography on silica gel eluting with hexane/ethyl acetate to afford the corresponding thioester product **3a** (0.06 g, 83%) and corresponding thianthrene by-product (0.061 g, 94%).

##### (b) Investigations of green chemistry metrics

The green chemistry metrics including Atom Economy (AE), Carbon efficiency, Reaction Mass Efficiency (RME), Process Mass Intensity (PMI), *E*-factor were calculated according to literature.<sup>8</sup>



$$AE (\%) = \frac{\text{Molecular weight of product}}{\text{Total molecular weight of reactants}} \times 100 = \frac{240.05 + 216.32}{468.28 + 114.21} \times 100 = 78.34\%$$

$$\text{Carbon efficiency (\%)} = \frac{\text{amount of carbon in product}}{\text{Total amount of carbon}} \times 100 = \frac{11}{21 + 2 - 12} \times 100 = 100\%$$

$$RME (\%) = \frac{\text{Mass of isolated product}}{\text{Total mass of reactants}} \times 100 = \frac{0.060 \text{ g} + 0.061}{0.141 \text{ g} + 0.069 \text{ g}} \times 100 = 57.62\%$$

PMI

$$= \frac{\text{Total mass of input material in the whole process (including solvents)}}{\text{Mass of product}} = \frac{0.141 \text{ g} + 0.069 \text{ g} + 1.65 \text{ g} + 0.07 \text{ g}}{0.060 \text{ g} + 0.061 \text{ g}} = 15.37$$

$$E\text{-factor} = \frac{\text{Total mass of wastes}}{\text{mass of product}} = \frac{0.141 \text{ g} + 0.069 \text{ g} + 1.65 \text{ g} + 0.07 \text{ g} - 0.060 \text{ g} - 0.061 \text{ g}}{0.060 \text{ g} + 0.061 \text{ g}} = 14.95$$

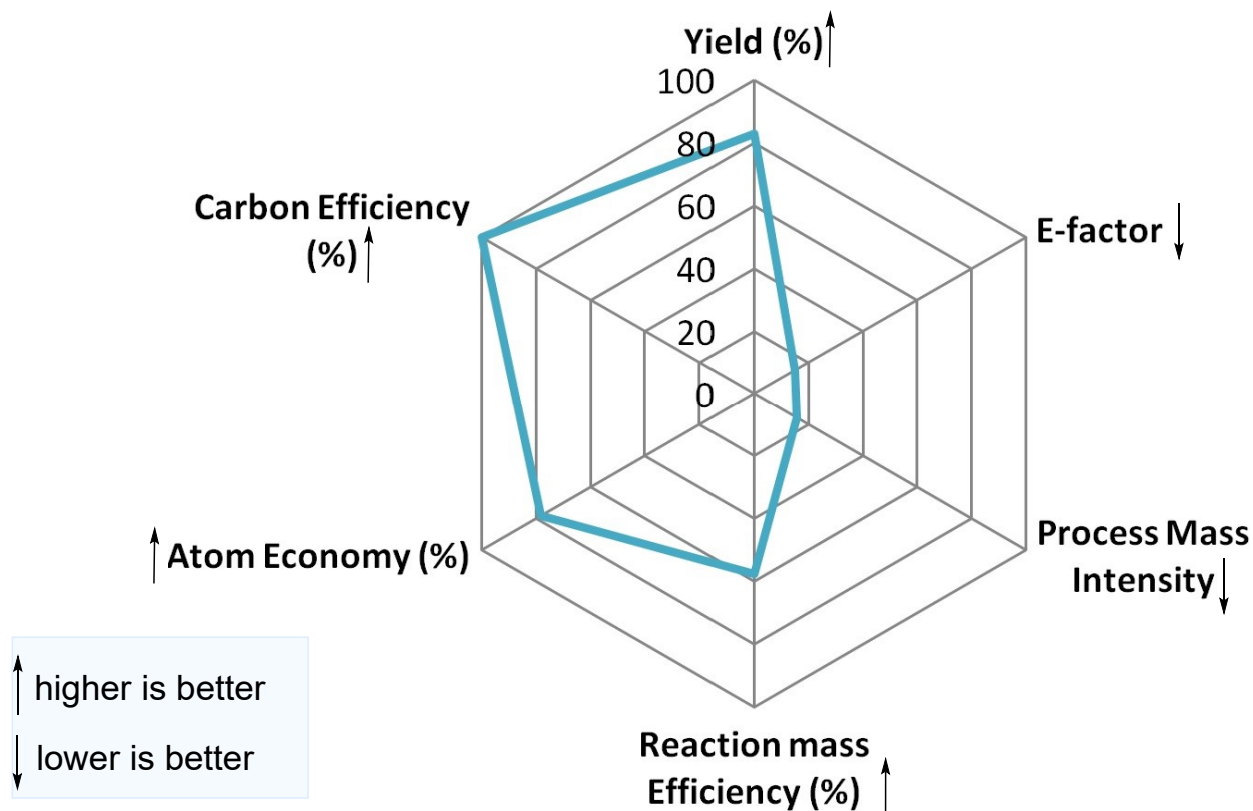

Figure 9: Summary of green metrics

**(c) Calculations of EcoScale<sup>8f</sup>**

| Score on <b>EcoScale</b> : > 75, Excellent; >50, Acceptable; <50, Inadequate |          |         |                |                                                                 |                                          |
|------------------------------------------------------------------------------|----------|---------|----------------|-----------------------------------------------------------------|------------------------------------------|
| <b>Parameters</b>                                                            |          |         |                |                                                                 | <b>Penalty points</b>                    |
| <b>Techniques</b>                                                            |          |         |                |                                                                 | Visible light irradiation<br>(this work) |
| <b>Solvent</b>                                                               |          |         |                |                                                                 | DMSO                                     |
| <b>Reaction yield %</b><br><b>Penalty points = (100 - %yield)/2</b>          |          |         |                |                                                                 | 83%<br>8.5                               |
| Chemical Components                                                          | mmol     | MW      | Price/<br>mmol | Price of<br>component<br>to obtain<br>10 mmol<br>end<br>product |                                          |
| Methyl-2-methoxybenzoate-derived sulfonium salt                              | 0.3 mmol | 381.061 | > \$1          | > \$1                                                           | 3                                        |
| Potassium thioacetate                                                        | 0.6 mmol | 114.21  | < \$1          | < \$1                                                           | 0                                        |
| 4Å molecular seive                                                           | 0.06 g   | -       | < \$1          | < \$1                                                           | 0                                        |
| DMSO                                                                         | 1.5 mL   | 78.13   | < \$1          | < \$1                                                           | 0                                        |
| <b>3. Safety</b>                                                             |          |         |                |                                                                 |                                          |
| Methyl-2-methoxybenzoate-derived sulfonium salt                              |          |         |                |                                                                 | 0                                        |
| Potassium thioacetate                                                        |          |         |                |                                                                 | 0                                        |
| DMSO (T)                                                                     |          |         |                |                                                                 | 5                                        |
| <b>4. Technical Setup</b>                                                    |          |         |                |                                                                 |                                          |
| Unconventional activation technique<br>(photochemical activation)            |          |         |                |                                                                 | 2                                        |
| (inert) gas atmosphere- argon                                                |          |         |                |                                                                 | 1                                        |
| <b>5. Temperature/Time</b>                                                   |          |         |                |                                                                 |                                          |

|                                                     |                             |
|-----------------------------------------------------|-----------------------------|
| Room temperature, < 1 h                             | 0                           |
| <b>6. Workup and purification</b>                   |                             |
| Classical chromatography                            | 10                          |
| <b>Penalty points total</b>                         | <b>29.5</b>                 |
| <b>EcoScale = 100 – sum of individual penalties</b> | <b>70.5</b>                 |
| Ranking of reaction                                 | <b>Acceptable synthesis</b> |

**EcoScale** = 100 – sum of individual penalties

Score on **EcoScale**; > 75, Excellent; >50, Acceptable; <50, Inadequate

**EcoScale score** = 100 – 28 = 70.5 (< 75: it is an acceptable synthesis)

## 5. NMR data

### 5.1 Characterization Data of Products

#### Methyl 5-(acetylthio)-2-methoxybenzoate (3):

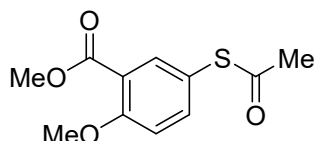

The titled compound was synthesized according to the general procedure **A** and was obtained as a colourless oil.

**Yield:** 83% (60 mg)

**R<sub>f</sub>:** 0.37 (Mobile phase: 15% EtOAc in Hexane).

**<sup>1</sup>H NMR** (500 MHz, CDCl<sub>3</sub>, 300 K): δ (ppm) = 7.84 (d, *J* = 2.5 Hz, 1H), 7.49 (dd, *J* = 8.5, 2.5 Hz, 1H), 7.02 (d, *J* = 9.0 Hz, 1H), 3.93 (s, 3H), 3.87 (s, 3H), 2.41 (s, 3H)

**<sup>13</sup>C NMR** (126 MHz, CDCl<sub>3</sub>, 300 K): δ (ppm) = 194.5, 165.7, 160.2, 140.0, 138.1, 120.8, 118.7, 113.0, 56.3, 52.3, 30.1.

**HRMS-ESI** (*m/z*) calc'd for C<sub>11</sub>H<sub>12</sub>NaO<sub>4</sub>S: [M+Na]<sup>+</sup>, 263.0354; Found, 263.0363.

#### S-(3-cyano-4-methoxyphenyl) ethanethioate (4):

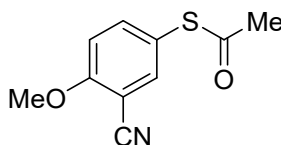

The titled compound was synthesized according to the general procedure **A** and was obtained as a white solid.

**Yield:** 85% (53 mg).

**R<sub>f</sub>:** 0.17 (Mobile phase: 10% EtOAc in Hexane).

**mp:** 130-131°C

**<sup>1</sup>H NMR** (500 MHz, CDCl<sub>3</sub>, 300 K): δ (ppm) = 7.57-7.55 (m, 1H), 7.55-7.51 (m, 1H), 7.01 (d, *J* = 9.0 Hz, 1H), 3.94 (s, 3H), 2.41 (s, 3H)

**<sup>13</sup>C NMR** (126 MHz, CDCl<sub>3</sub>, 300 K): δ (ppm) = 193.7, 162.1, 141.0, 139.8, 119.8, 115.6, 112.3, 103.0, 56.5, 30.2.

**HRMS-ESI** (m/z) calc'd for C<sub>10</sub>H<sub>9</sub>NaNO<sub>2</sub>S: [M+Na]<sup>+</sup>, 230.0252; Found, 230.0252.

**S-(4'-(cyanomethyl)-[1,1'-biphenyl]-4-yl) ethanethioate (5):**

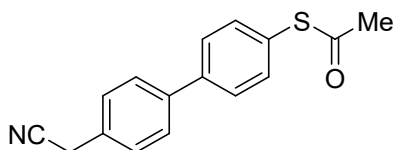

The titled compound was synthesized according to the general procedure **A** and obtained as a white solid.

**Yield:** 81% (65 mg).

**R<sub>f</sub>:** 0.3 (Mobile phase: 20% EtOAc in Hexane).

**mp:** 129-131°C

**<sup>1</sup>H NMR** (500 MHz, CDCl<sub>3</sub>, 300 K): δ (ppm) = 7.63-7.58 (m, 4H), 7.49 (dt, *J* = 8.5, 2.0 Hz, 2H), 7.41 (d, *J* = 8.5 Hz, 2H), 3.80 (s, 2H), 2.46 (s, 3H).

**<sup>13</sup>C NMR** (126 MHz, CDCl<sub>3</sub>, 300 K): δ (ppm) = 194.2, 141.4, 140.1, 135.0, 129.6, 128.6, 128.0, 127.9, 127.3, 117.9, 30.4, 23.4.

**HRMS-ESI** (m/z) calc'd for C<sub>16</sub>H<sub>13</sub>NNaOS: [M+Na]<sup>+</sup>, 290.0616; Found, 290.0624.

**S-(3,4-dimethoxyphenyl) ethanethioate (6):**

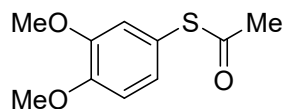

The titled compound was synthesized according to the general procedure **A** and was obtained as a white solid.

**Yield:** 86% (55 mg).

**R<sub>f</sub>:** 0.2 (Mobile phase: 10% EtOAc in Hexane).

**mp:** 78-80°C

**<sup>1</sup>H NMR** (500 MHz, CDCl<sub>3</sub>, 300 K): δ (ppm) = 6.97 (dd, *J* = 8.5, 2.0 Hz, 1H), 6.93-6.78 (m, 2H), 3.87 (s, 3H), 3.85 (s, 3H), 2.38 (s, 3H).

**<sup>13</sup>C NMR** (126 MHz, CDCl<sub>3</sub>, 300 K): δ (ppm) = 195.2, 150.3, 149.2, 127.8, 118.9, 117.3, 111.6, 56.0, 55.9, 30.0.

**<sup>1</sup>H** and **<sup>13</sup>C NMR** of the product are in agreement with the literature.<sup>9</sup>

### S-(3-formyl-4-methoxyphenyl) ethanethioate (7):

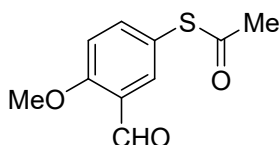

The titled compound was synthesized according to the general procedure **A** and was obtained as a colourless oil.

**Yield:** 73% (45 mg)

**R<sub>f</sub>:** 0.25 (Mobile phase: 10% EtOAc in Hexane).

**<sup>1</sup>H NMR** (500 MHz, CDCl<sub>3</sub>, 300 K): δ (ppm) = 10.43 (s, 1H), 7.84 (d, *J* = 2.5 Hz, 1H), 7.57 (dd, *J* = 8.5, 2.5 Hz, 1H), 7.05 (d, *J* = 8.5, Hz, 1H), 3.96 (s, 3H), 2.42 (s, 3H).

**<sup>13</sup>C NMR** (126 MHz, CDCl<sub>3</sub>, 300 K): δ (ppm) = 194.3, 188.8, 162.5, 142.2, 134.9, 125.5, 119.8, 112.8, 56.0, 30.1

**HRMS-ESI** (*m/z*) calc'd for C<sub>10</sub>H<sub>10</sub>O<sub>3</sub>S: [M+H]<sup>+</sup>, 211.0384; Found, 211.0423.

### S-(3-methoxy-5-methyl-2-nitrophenyl) ethanethioate (8):

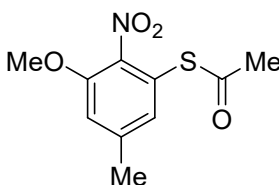

The titled compound was synthesized according to the general procedure **A** and was obtained as a colourless oil.

**Yield:** 82% (59 mg)

**R<sub>f</sub>:** 0.32 (Mobile phase: 10% EtOAc in Hexane).

**<sup>1</sup>H NMR** (500 MHz, CDCl<sub>3</sub>, 300 K): δ (ppm) = 7.93 (s, 1H), 7.02 (s, 1H), 3.96 (s, 3H), 2.42 (s, 3H), 2.37 (s, 3H)

**<sup>13</sup>C NMR** (126 MHz, CDCl<sub>3</sub>, 300 K): δ (ppm) = 193.1, 154.3, 150.3, 137.4, 133.4, 119.1, 115.5, 56.7, 30.2, 21.5.

**HRMS-ESI** (m/z) calc'd for C<sub>10</sub>H<sub>11</sub>NNaO<sub>4</sub>S: [M+Na]<sup>+</sup>, 264.0301; Found, 264.0315.

### S-(2-methoxy-5-methylphenyl) ethanethioate (9):

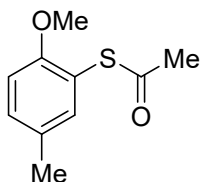

The titled compound was synthesized according to the general procedure **A** and was obtained as a colourless oil.

**Yield:** 90% (53 mg).

**R<sub>f</sub>:** 0.44 (Mobile phase: 10% EtOAc in Hexane).

**<sup>1</sup>H NMR** (500 MHz, CDCl<sub>3</sub>, 300 K): δ (ppm) = 7.22-7.19 (m, 2H) 6.87 (dd, *J* = 6.0, 3.0 Hz, 1H), 3.81 (s, 3H), 2.40 (s, 3H), 2.29 (s, 3H).

**<sup>13</sup>C NMR** (126 MHz, CDCl<sub>3</sub>, 300 K): δ (ppm) = 193.9, 157.2, 137.2, 132.3, 130.5, 115.7, 111.6, 56.2, 30.1, 20.4.

**HRMS-ESI** (m/z) calc'd for C<sub>10</sub>H<sub>12</sub>NaO<sub>2</sub>S: [M+Na]<sup>+</sup>, 219.0456; Found, 219.0455.

### S-(4-(phenylthio)phenyl) ethanethioate (10):

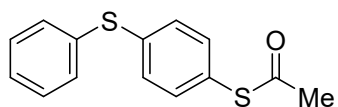

The titled compound was synthesized according to the general procedure **A** and was obtained as a light brown oil

**Yield:** 79% (62 mg).

**R<sub>f</sub>:** 0.58 (Mobile phase: 5% EtOAc in Hexane).

**<sup>1</sup>H NMR** (500 MHz, CDCl<sub>3</sub>, 300 K): δ (ppm) = 7.47-7.44 (m, 2H), 7.38-7.33 (m, 3H), 7.31-7.25 (m, 4H), 2.42 (s, 3H).

**<sup>13</sup>C NMR** (126 MHz, CDCl<sub>3</sub>, 300 K): δ (ppm) = 194.1, 139.6, 135.0, 133.6, 133.0, 129.7, 129.6, 128.3, 125.6, 30.3.

**HRMS-ESI** (m/z) calc'd for C<sub>14</sub>H<sub>12</sub>NaOS<sub>2</sub>: [M+Na]<sup>+</sup>, 283.0227; Found, 283.0217.

**S-(9-oxo-9H-fluoren-2-yl) ethanethioate (11):**

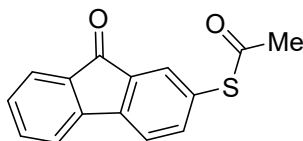

The titled compound was synthesized according to the general procedure **A** and was obtained as a yellow solid.

**Yield:** 71% (54 mg).

**R<sub>f</sub>:** 0.43 (Mobile phase: 10% EtOAc in Hexane).

**mp:** 107-108 °C

**<sup>1</sup>H NMR** (500 MHz, CDCl<sub>3</sub>, 300 K): δ (ppm) = 7.68-7.64 (m, 2H), 7.57-7.48 (m, 4H), 7.33 (t, *J* = 7.5 Hz, 1H), 2.45 (s, 3H)

**<sup>13</sup>C NMR** (126 MHz, CDCl<sub>3</sub>, 300 K): δ (ppm) = 193.4, 192.8, 145.4, 143.7, 140.8, 135.0, 134.2, 130.3, 129.8, 129.1, 128.5, 124.6, 121.0, 120.8, 30.4.

**HRMS-ESI** (m/z) calc'd for C<sub>15</sub>H<sub>10</sub>NaO<sub>2</sub>S: [M+Na]<sup>+</sup>, 277.0299; Found, 277.0303.

**S-(3-fluoro-4-methoxyphenyl) ethanethioate (12):**

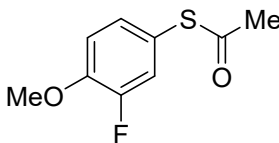

The titled compound was synthesized according to the general procedure **A** and was obtained as a colourless oil.

**Yield:** 85% (51 mg).

**R<sub>f</sub>:** 0.52 (Mobile phase: 10% EtOAc in Hexane).

**<sup>1</sup>H NMR** (500 MHz, CDCl<sub>3</sub>, 300 K): δ (ppm) = 7.12-7.09 (m, 2H), 6.97 (t, *J* = 9.5 Hz, 1H), 3.88 (s, 3H), 2.38 (s, 3H).

**<sup>13</sup>C NMR** (126 MHz, CDCl<sub>3</sub>, 300 K): δ (ppm) = 194.4, 152.1 (d, *J* = 249.6 Hz), 149.0 (d, *J* = 10.7 Hz), 131.2 (d, *J* = 3.9 Hz), 122.3 (d, *J* = 19.4 Hz), 119.1 (d, *J* = 7.6 Hz), 113.6 (d, *J* = 3.2 Hz), 56.2, 30.0.

**<sup>19</sup>F NMR** (471 MHz, CDCl<sub>3</sub>, 300 K): δ (ppm) = -133.45

**HRMS-ESI** (m/z) calc'd for C<sub>9</sub>H<sub>9</sub>FNaO<sub>2</sub>S: [M+Na]<sup>+</sup>, 223.0200; Found, 223.0199.

### S-(3-chloro-4-methoxyphenyl) ethanethioate (13):

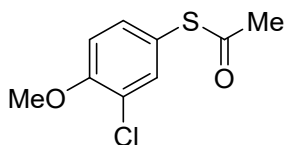

The titled compound was synthesized according to the general procedure **A** and was obtained as a colourless oil.

**Yield:** 82% (53 mg).

**R<sub>f</sub>:** 0.21 (Mobile phase: 5% EtOAc in Hexane).

**<sup>1</sup>H NMR** (500 MHz, CDCl<sub>3</sub>, 300 K): δ (ppm) = 7.39 (d, *J* = 7.0 Hz, 1H), 7.24 (dd, *J* = 8.5, 2.5 Hz, 1H), 6.93 (d, *J* = 8.5 Hz, 1H), 3.89 (s, 3H), 2.38 (s, 3H).

**<sup>13</sup>C NMR** (126 MHz, CDCl<sub>3</sub>, 300 K): δ (ppm) = 194.4, 156.2, 136.1, 134.6, 123.0, 119.6, 112.5, 56.3, 30.1.

**HRMS-ESI** (m/z) calc'd for C<sub>9</sub>H<sub>9</sub>ClNaO<sub>2</sub>S: [M+Na]<sup>+</sup>, 238.9909; Found, 238.9915.

### S-(5-bromo-2-methoxyphenyl) ethanethioate (14):

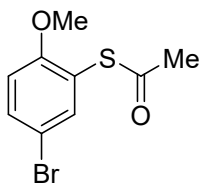

The titled compound was synthesized according to the general procedure **A** and was obtained as a colourless oil.

**Yield:** 72% (58 mg)

**R<sub>f</sub> =** 0.37 (Mobile phase: 5% EtOAc in Hexane).



**<sup>1</sup>H NMR** (500 MHz, CDCl<sub>3</sub>, 300 K): δ (ppm) = 7.51 (d, *J* = 2.5 Hz, 1H), 7.49 (dd, *J* = 8.5, 2.5 Hz, 1H), 6.84 (d, *J* = 9.0 Hz, 1H), 3.82 (s, 3H), 2.41 (s, 3H).

**<sup>13</sup>C NMR** (126 MHz, CDCl<sub>3</sub>, 300 K): δ (ppm) = 192.5, 158.5, 138.8, 134.3, 118.3, 113.1, 112.7, 56.3, 30.2.

**HRMS-ESI** (*m/z*) calc'd for C<sub>9</sub>H<sub>10</sub>BrO<sub>2</sub>S: [M+H]<sup>+</sup>, 260.9540; Found, 260.9579.

**S-(3-iodo-4-methoxyphenyl) ethanethioate (15):**

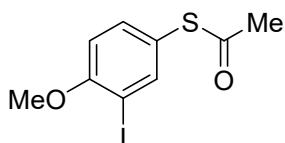

The titled compound was synthesized according to the general procedure **A** and was obtained as a colourless oil.

**Yield:** 76% (70 mg).

**R<sub>f</sub>** = 0.52 (Mobile phase: 5% EtOAc in Hexane).

**<sup>1</sup>H NMR** (500 MHz, CDCl<sub>3</sub>, 300 K): δ (ppm) = 7.79 (d, *J* = 2 Hz, 1H), 7.34 (dd, *J* = 8.5, 2.0 Hz, 1H), 6.84 (d, *J* = 8.5 Hz, 1H), 3.89 (s, 3H), 2.40 (s, 3H).

**<sup>13</sup>C NMR** (126 MHz, CDCl<sub>3</sub>, 300 K): δ (ppm) = 194.5, 159.2, 145.0, 136.3, 120.6, 111.3, 86.4, 56.6, 30.1.

**HRMS-ESI** (*m/z*) calc'd for C<sub>9</sub>H<sub>9</sub>INaO<sub>2</sub>S: [M+Na]<sup>+</sup>, 330.9266; Found, 330.9281.

**S-(5-iodo-2-methoxyphenyl) ethanethioate (16):**

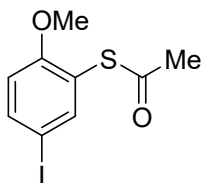

The titled compound was synthesized according to the general procedure **A** and was obtained as a white solid.

**Yield:** 74% (68 mg).

**R<sub>f</sub>**: 0.42 (Mobile phase: 5% EtOAc in Hexane).

**mp:** 71-73°C

**<sup>1</sup>H NMR** (500 MHz, CDCl<sub>3</sub>, 300 K): δ (ppm) = 7.79 (d, *J* = 2.0 Hz, 1H), 7.34 (dd, *J* = 8.5, 2.0 Hz, 1H), 6.84 (d, *J* = 8.5 Hz, 1H), 3.89 (s, 3H), 2.39 (s, 3H).

**<sup>13</sup>C NMR** (126 MHz, CDCl<sub>3</sub>, 300 K): δ (ppm) = 194.5, 159.2, 145.0, 136.3, 120.6, 111.3, 86.4, 56.6, 30.1

**HRMS-ESI** (*m/z*) calc'd for C<sub>9</sub>H<sub>9</sub>INaO<sub>2</sub>S: [M+Na]<sup>+</sup>, 330.9266; Found, 330.9258.

**S-(2'-fluoro-[1,1'-biphenyl]-4-yl) ethanethioate (17):**

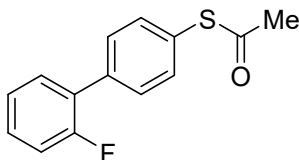

The titled compound was synthesized according to the general procedure **A** and was obtained as a white solid.

**Yield:** 75% (55 mg).

**R<sub>f</sub>** = 0.71 (Mobile phase: 10% EtOAc in Hexane).

**mp:** 113-115°C

**<sup>1</sup>H NMR** (500 MHz, CDCl<sub>3</sub>, 300 K): δ (ppm) = 7.60 (dt, *J* = 6.5, 1.5 Hz, 2H), 7.50 (dt, *J* = 8.0, 2.5 Hz, 2H), 7.46 (td, *J* = 7.8, 1.5 Hz, 1H), 7.37-7.32 (m, 1H), 7.23 (td, *J* = 7.5, 1 Hz, 1H), 7.19-7.15 (m, 1H), 2.46 (s, 3H).

**<sup>13</sup>C NMR** (126 MHz, CDCl<sub>3</sub>, 300 K): δ (ppm) = 194.2, 159.8 (d, *J* = 249.0 Hz), 137.1, 134.5, 130.8 (d, *J* = 3.5 Hz), 129.9 (d, *J* = 14.0 Hz), 129.6 (d, *J* = 8.4 Hz), 128.1 (d, *J* = 13.2 Hz), 127.4, 124.6 (d, *J* = 3.9 Hz), 116.3 (d, *J* = 22.7 Hz), 30.4.

**<sup>19</sup>F NMR** (471 MHz, CDCl<sub>3</sub>, 300 K): δ (ppm) = -117.53

**HRMS-ESI** (*m/z*) calc'd for C<sub>14</sub>H<sub>11</sub>FNaOS: [M+Na]<sup>+</sup>, 269.0412; Found, 269.0414.

**S-(4-(2-cyano-3-fluorophenoxy)phenyl) ethanethioate (18):**

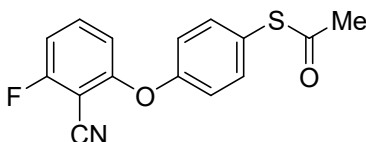

The titled compound was synthesized according to the general procedure **A** was obtained as white solid.

**Yield:** 79% (68 mg).

**R<sub>f</sub>** = 0.25 (Mobile phase: 10% EtOAc in Hexane).

**mp:** 163-165°C

**<sup>1</sup>H NMR** (500 MHz, CDCl<sub>3</sub>, 300 K): δ (ppm) = 7.50 - 7.43 (m, 3H), 7.13 (d, *J* = 8.3 Hz, 2H), 6.92 (d, *J* = 8.5 Hz, 1H), 6.71 (d, *J* = 8.5 Hz, 1H), 2.44 (s, 3H).

**<sup>13</sup>C NMR** (126 MHz, CDCl<sub>3</sub>, 300 K): δ (ppm) = 193.9, 160.2 (d, *J* = 4.3 Hz), 155.7, 136.6, 135.1 (d, *J* = 10.5 Hz), 124.8, 120.8, 112.7 (d, *J* = 38.0 Hz), 110.5 (d, *J* = 19.7 Hz), 94.3 (d, *J* = 18.1 Hz), 30.4.

**<sup>19</sup>F NMR** (471 MHz, CDCl<sub>3</sub>, 300 K): δ (ppm) = -104.16

**HRMS-ESI** (m/z) calc'd for C<sub>15</sub>H<sub>10</sub>FNNaO<sub>2</sub>S: [M+Na]<sup>+</sup>, 310.0314; Found, 310.0310.

**S-(3-chloro-6-methoxy-2,4-dimethylphenyl) ethanethioate (19):**

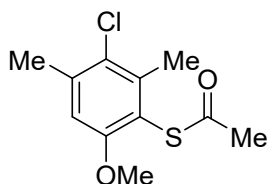

The titled compound was synthesized according to the general procedure **A** and was obtained as a pale yellow oil.

**Yield:** 62% (47 mg).

**R<sub>f</sub>**: 0.31 (Mobile phase: 5% EtOAc in Hexane).

**<sup>1</sup>H NMR** (500 MHz, CDCl<sub>3</sub>, 300 K): δ (ppm) = 6.71 (s, 1H), 3.79 (s, 3H), 2.44 (s, 3H), 2.41 (s, 3H), 2.39 (s, 3H).

**<sup>13</sup>C NMR** (126 MHz, CDCl<sub>3</sub>, 300 K): δ (ppm) = 193.0, 157.7, 141.4, 139.7, 127.3, 114.9, 111.5, 56.3, 30.1, 21.8, 19.4.

**HRMS-ESI** (m/z) calc'd for C<sub>11</sub>H<sub>13</sub>ClNaO<sub>2</sub>S: [M+Na]<sup>+</sup>, 267.0227; Found, 267.0215.

**Methyl 2-(4'-(acetylthio)-2-fluoro-[1,1'-biphenyl]-4-yl)propanoate (20):**

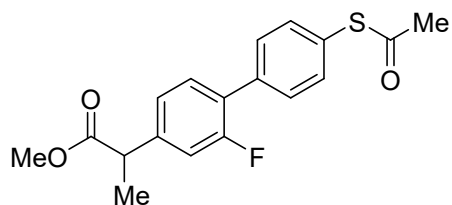

The titled compound was synthesized according to the general procedure **A** and was obtained as a pale yellow oil.

**Yield:** 77% (77 mg).

**R<sub>f</sub>** = 0.17 (Mobile phase: 5% EtOAc in Hexane).

**<sup>1</sup>H NMR** (500 MHz, CDCl<sub>3</sub>, 300 K): δ (ppm) = 7.58 (dd, *J* = 8.5, 1.5 Hz, 2H), 7.48 (dt, *J* = 8.5, 2.0 Hz, 2H), 7.40 (t, *J* = 8.0 Hz, 1H), 7.18 – 7.11 (m, 2H), 3.77 (q, *J* = 7.0 Hz, 1H), 3.70 (s, 3H), 2.44 (s, 3H), 1.54 (d, *J* = 7.0 Hz, 3H).

**<sup>13</sup>C NMR** (126 MHz, CDCl<sub>3</sub>, 300 K): δ (ppm) = 194.1, 174.4, 159.8 (d, *J* = 249.6 Hz), 142.5 (d, *J* = 8.1 Hz), 136.7, 134.5, 130.8 (d, *J* = 4.0 Hz), 129.8 (d, *J* = 3.5 Hz), 127.4, 126.9 (d, *J* = 13.2 Hz), 123.8 (d, *J* = 3.8 Hz), 115.5 (d, *J* = 23.6 Hz), 52.4, 45.0, 30.4, 18.5.

**<sup>19</sup>F NMR** (471 MHz, CDCl<sub>3</sub>, 300 K): δ (ppm) = -117.0

**HRMS-ESI** (m/z) calc'd for C<sub>18</sub>H<sub>21</sub>FNO<sub>3</sub>S: [M+NH<sub>4</sub>]<sup>+</sup>, 350.1226; Found, 350.1223.

**Methyl 4-(4'-(acetylthio)-[1,1'-biphenyl]-4-yl)-4-oxobutanoate (21):**

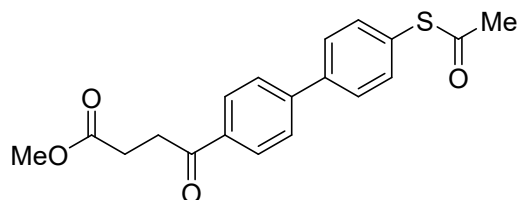

The titled compound was synthesized according to the general procedure **A** and was obtained as a off-white solid.

**Yield:** 73% (75 mg).

**R<sub>f</sub>**: 0.14 (Mobile phase: 10% EtOAc in Hexane).

**mp:** 121-123°C

**<sup>1</sup>H NMR** (500 MHz, CDCl<sub>3</sub>, 300 K): δ (ppm) = 8.04 (d, *J* = 8.0 Hz, 2H), 7.69-7.60 (m, 4H), 7.49 (d, *J* = 8.5 Hz, 2H), 3.33 (t, *J* = 6.5 Hz, 2H), 3.70 (s, 3H), 2.78 (t, *J* = 6.5 Hz, 2H), 2.44 (s, 3H).

**<sup>13</sup>C NMR** (125 MHz, CDCl<sub>3</sub>, 300 K): δ (ppm) = 197.6, 193.8, 173.4, 144.7, 140.9, 135.7, 134.9, 128.7, 128.1, 128.0, 127.3, 51.9, 33.5., 30.3, 28.1.

**HRMS-ESI** (m/z) calc'd for C<sub>19</sub>H<sub>18</sub>NaO<sub>4</sub>S: [M+Na]<sup>+</sup>, 365.0823; Found, 365.0818.

**Isopropyl 2-(2-(acetylthio)-4-(4-chlorobenzoyl)phenoxy)-2-methylpropanoate (21):**

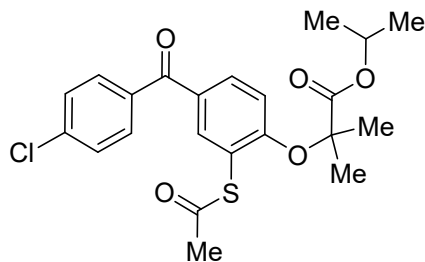

The titled compound was synthesized according to the general procedure **A** and was obtained as a colourless oil.

**Yield:** 41% (53 mg).

**R<sub>f</sub>:** 0.29 (Mobile phase: 10% EtOAc in Hexane).

**<sup>1</sup>H NMR** (500 MHz, CDCl<sub>3</sub>, 300 K): δ (ppm) = 7.87 (d, *J* = 2.0 Hz, 1H), 7.79 (dd, *J* = 11.0, 2.0 Hz, 1H), 7.74 (d, *J* = 8.5, 2.5 Hz, 2H), 7.46 (dt, *J* = 8.5, 2.5 Hz, 2H), 6.8 (d, *J* = 8.5 Hz, 1H), 5.08 (quint, *J* = 6 Hz, 1H), 2.42 (s, 3H), 1.64 (s, 6H), 1.21 (d, *J* = 6 Hz, 6H).

**<sup>13</sup>C NMR** (126 MHz, CDCl<sub>3</sub>, 300 K): δ (ppm) = 193.5, 192.8, 172.9, 159.3, 139.1, 138.8, 135.9, 132.9, 131.4, 130.4, 128.8, 119.1, 115.7, 80.6, 69.7, 30.2, 25.1, 21.6.

**HRMS-ESI** (m/z) calc'd for C<sub>22</sub>H<sub>24</sub>ClO<sub>5</sub>S: [M+H]<sup>+</sup>, 435.0988; Found, 435.1028.

#### Methyl 2-(2-(acetylthio)-4-chlorophenoxy)acetate (**23**):

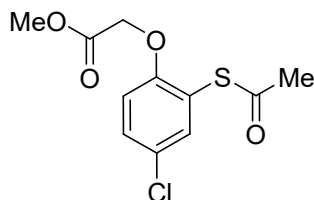

The titled compound was synthesized according to the general procedure **A** and was obtained as a brown oil.

**Yield:** 70% (71 mg)

**R<sub>f</sub>:** 0.28 (Mobile phase: 20% EtOAc in Hexane).

**<sup>1</sup>H NMR** (500 MHz, CDCl<sub>3</sub>, 300 K): δ (ppm) = 7.41 (d, *J* = 3.5 Hz, 1H), 7.34-7.30 (m, 1H), 6.78 (d, *J* = 9.0 Hz, 1H), 4.64 (s, 2H), 3.77 (s, 3H), 2.43 (s, 3H).

**<sup>13</sup>C NMR** (126 MHz, CDCl<sub>3</sub>, 300 K): δ (ppm) = 192.6, 168.7, 156.3, 136.2, 131.3, 127.0, 119.1, 114.0, 66.3, 52.5, 30.3.

**HRMS-ESI** (m/z) calc'd for C<sub>11</sub>H<sub>11</sub>ClNaO<sub>4</sub>S: [M+Na]<sup>+</sup>, 296.9959; Found, 296.9959.

#### Ethyl 2-(2-(acetylthio)-4-chlorophenoxy)-2-methylpropanoate (**20**):

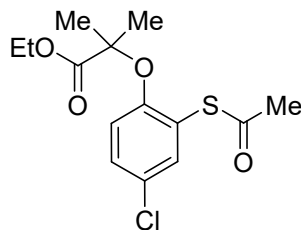

The titled compound was synthesized according to the general procedure **B** and was obtained as a colourless oil.

**Yield:** 65% (62 mg).

**R<sub>f</sub>:** 0.25 (Mobile phase: 5% EtOAc in Hexane).

**<sup>1</sup>H NMR** (500 MHz, CDCl<sub>3</sub>, 300 K): δ (ppm) = 7.42 (d, *J* = 2.5 Hz, 1H), 7.24 (dd, *J* = 9.0, 3.0 Hz, 1H), 6.73 (d, *J* = 9.0 Hz, 1H), 4.22 (q, *J* = 7.5 Hz, 2H), 2.4 (s, 3H), 1.24 (t, *J* = 7.0 Hz, 3H), 1.56 (s, 6H).

**<sup>13</sup>C NMR** (126 MHz, CDCl<sub>3</sub>, 300 K): δ (ppm) = 192.7, 173.8, 154.2, 135.9, 130.6, 126.9, 121.5, 118.5, 80.4, 61.7, 30.2, 25.0, 14.1.

**HRMS-ESI** (m/z) calc'd for C<sub>14</sub>H<sub>17</sub>ClNaO<sub>4</sub>S: [M+Na]<sup>+</sup>, 339.0434; Found, 339.0447.

**Methyl 5-(4-(acetylthio)-2,5-dimethylphenoxy)-2,2-dimethylpentanoate (24):**

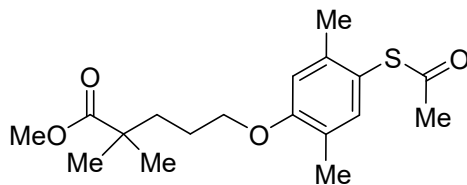

The titled compound was synthesized according to the general procedure **A** under 2 hrs of light irradiation and was obtained as a light brown oil.

**Yield:** 74% (75 mg).

**R<sub>f</sub>:** 0.37 (Mobile phase: 10% EtOAc in Hexane).

**<sup>1</sup>H NMR** (500 MHz, CDCl<sub>3</sub>, 300 K): δ (ppm) = 7.11 (s, 1H), 6.71 (s, 1H), 3.92 (t, *J* = 5.5 Hz, 2H), 3.65 (s, 3H), 2.36 (s, 3H), 2.28 (s, 3H), 2.15 (s, 3H), 1.74-1.67 (m, 4H), 1.21 (s, 6H).

**<sup>13</sup>C NMR** (126 MHz, CDCl<sub>3</sub>, 300 K): δ (ppm) = 195.1, 178.2, 158.6, 141.0, 137.7, 125.2, 117.3, 113.0, 68.0, 51.8, 42.1, 37.1, 30.0, 25.3, 25.2, 20.9, 15.7.

**HRMS-ESI** (m/z) calc'd for C<sub>18</sub>H<sub>26</sub>NO<sub>4</sub>S: [M+Na]<sup>+</sup>, 361.1449; Found, 361.1445.

**S-(4-(4-(2-(pyridin-2-yloxy)propoxy)phenoxy)phenyl) ethanethioate (25):**

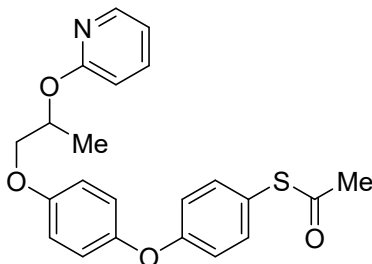

The titled compound was synthesized according to the general procedure **A** under 2 hrs of light irradiation and was obtained as brown solid.

**Yield:** 72% (85 mg).

**R<sub>f</sub>:** 0.37 (Mobile phase: 10% EtOAc in Hexane).

**mp:** 68-69°C

**<sup>1</sup>H NMR** (500 MHz, CDCl<sub>3</sub>, 300 K): δ (ppm) = 8.16 (dd, *J* = 5.0, 1.0 Hz, 1H), 7.56 (dt, *J* = 7.5, 2.0 Hz, 1H), 7.31 (dd, *J* = 6.5, 2.0 Hz, 2H), 6.99 (d, *J* = 9.0 Hz, 2H), 6.95 (dd, *J* = 9.0, 3.0 Hz, 4H), 6.85 (t, *J* = 6.5 Hz, 1H), 6.75 (d, *J* = 8.0 Hz, 1H), 5.61 (Sextet, *J* = 6.0 Hz, 1H), 4.22-4.07 (m, 2H), 2.39 (s, 3H), 1.48 (d, *J* = 6.5 Hz, 3H).

**<sup>13</sup>C NMR** (126 MHz, CDCl<sub>3</sub>, 300 K): δ (ppm) = 194.7, 163.2, 160.0, 155.8, 149.2, 146.8, 138.7, 136.1, 121.5, 120.5, 117.8, 116.8, 116.0, 111.7, 71.1, 69.3, 30.0, 17.1.

**HRMS-ESI** (m/z) calc'd for C<sub>22</sub>H<sub>22</sub>NO<sub>4</sub>S: [M+H]<sup>+</sup>, 396.1225; Found, 396.1279.

**S-(2-ethoxy-5-(2-methyl-1-((3-phenoxybenzyl)oxy)propan-2-yl)phenyl) ethanethioate (27):**

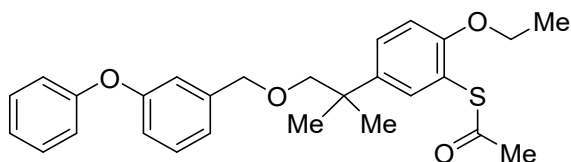

The titled compound was synthesized according to the general procedure **A** and was obtained as a pale yellow oil.

**Yield:** 66% (89 mg).

**R<sub>f</sub>:** 0.72 (Mobile phase: 20% EtOAc in Hexane).

**<sup>1</sup>H NMR** (500 MHz, CDCl<sub>3</sub>, 300 K): δ (ppm) = 7.41-7.33 (m, 4H), 7.29 (t, *J* = 7.5 Hz, 1H), 7.0 (d, *J* = 7.5 Hz, 1H), 7.12 (t, *J* = 7.5 Hz, 1H), 7.03 (d, *J* = 7.5 Hz, 2H), 6.96 (s, 3H), 6.92 (dd, *J* = 8.25, 2.0 Hz, 1H), 6.87 (d, *J* = 8.5 Hz, 1H), 4.46 (s, 2H), 4.06 (q, *J* = 7.0 Hz, 2H), 3.42 (s, 2H), 2.40 (s, 3H), 1.39 (t, *J* = 7.0 Hz, 3H), 1.33 (s, 6H).

**<sup>13</sup>C NMR** (125 MHz, CDCl<sub>3</sub>, 300 K): δ (ppm) = 194.0, 157.4, 157.3, 156.8, 141.0, 140.1, 134.4, 129.8, 129.7, 129.4, 123.3, 122.1, 119.1, 117.8, 117.7, 116.1, 112.2, 80.2, 72.8, 64.5, 38.7, 30.1, 26.1, 14.9.

**HRMS-ESI** (m/z) calc'd for C<sub>27</sub>H<sub>34</sub>NO<sub>4</sub>S: [M+NH<sub>4</sub>]<sup>+</sup>, 468.2209; Found, 468.2202.

**S-(4-((5-methyl-2,4-dioxo-5-(4-phenoxyphenyl)oxazolidin-3-yl)amino)phenyl) ethanethioate (28):**

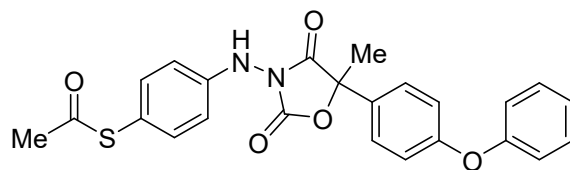

The titled compound was synthesized according to the general procedure **A** under 2 hrs of light irradiation and was obtained as a white solid.

**Yield:** 63% (85 mg).

**R<sub>f</sub>:** 0.65 (Mobile phase: 40% EtOAc in Hexane).

**mp:** 158-160°C

**<sup>1</sup>H NMR** (500 MHz, CDCl<sub>3</sub>, 300 K): δ (ppm) = 7.54 (d, *J* = 8.5 Hz, 2H), 7.39 (t, *J* = 7.5 Hz, 2H), 7.29 - 7.25 (m, 2H), 7.18 (t, *J* = 7.0 Hz, 1H), 7.05 (d, *J* = 9.0 Hz, 4H), 6.71 (d, *J* = 8.5 Hz, 2H), 6.48 (s, 1H), 2.39 (s, 3H), 1.99 (s, 3H).

**<sup>13</sup>C NMR** (125 MHz, CDCl<sub>3</sub>, 300 K): δ (ppm) = 194.9, 172.0, 158.7, 156.2, 152.8, 145.5, 136.0, 130.1, 130.1, 126.2, 124.2, 121.2, 119.7, 118.7, 114.5, 85.3, 30.1, 25.6.

**HRMS-ESI** (m/z) calc'd for C<sub>24</sub>H<sub>24</sub>N<sub>3</sub>O<sub>5</sub>S: [M+NH<sub>4</sub>]<sup>+</sup>, 466.1437; Found, 466.1432.

#### Methyl 2-methoxy-5-(nonanoylthio)benzoate (**29**):

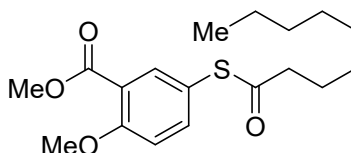

The titled compound was synthesized according to the general procedure **B** under 2 hrs of light irradiation and was obtained as a light brown oil.

**Yield:** 64% (65 mg)

**R<sub>f</sub>:** 0.22 (Mobile phase: 10% EtOAc in Hexane).

**<sup>1</sup>H NMR** (500 MHz, CDCl<sub>3</sub>, 300 K): δ (ppm) = 7.82 (d, *J* = 2.5 Hz, 1H), 7.47 (dd, *J* = 8.8, 2.5 Hz, 1H), 7.01 (d, *J* = 8.5 Hz, 1H), 3.91 (s, 3H), 3.86 (s, 3H), 2.62 (t, *J* = 7.5 Hz, 2H), 1.39 -1.19 (m, 12H), 0.87 (t, *J* = 7.0 Hz, 3H).

**<sup>13</sup>C NMR** (126 MHz, CDCl<sub>3</sub>, 300 K): δ (ppm) = 198.0, 165.7, 160.1, 140.1, 138.1, 120.7, 118.7, 112.9, 56.3, 52.2, 43.6, 31.9, 29.3, 29.2, 29.0, 25.6, 22.7, 14.2.

**HRMS-ESI** (m/z) calc'd for C<sub>18</sub>H<sub>26</sub>NaO<sub>4</sub>S: [M+Na]<sup>+</sup>, 361.1444; Found, 361.1447.



### Methyl 5-(decanoylthio)-2-methoxybenzoate (30):

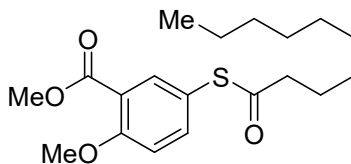

The titled compound was synthesized according to the general procedure **B** and was obtained as a brown oil.

**Yield:** 61% (65 mg).

**R<sub>f</sub>:** 0.29 (Mobile phase: 10% EtOAc in Hexane).

**<sup>1</sup>H NMR** (500 MHz, CDCl<sub>3</sub>, 300 K): δ (ppm) = 7.83 (d, *J* = 2.5 Hz, 1H), 7.48 (dd, *J* = 9.0, 2.5 Hz, 1H), 7.02 (d, *J* = 9.0 Hz, 1H), 3.92 (s, 3H), 3.87 (s, 3H), 2.63 (t, *J* = 7.5 Hz, 2H), 1.69 (quint, *J* = 7.5 Hz, 2H), 1.34-1.23 (m, 12H), 0.87 (t, *J* = 7.0 Hz, 3H).

**<sup>13</sup>C NMR** (126 MHz, CDCl<sub>3</sub>, 300 K): δ (ppm) = 198.0, 165.7, 160.1, 140.1, 138.1, 120.8, 118.8, 112.9, 56.3, 52.2, 43.7, 31.9, 29.8, 29.5, 29.3, 29.0, 25.6, 22.7, 14.2.

**HRMS-ESI** (m/z) calc'd for C<sub>19</sub>H<sub>28</sub>NaO<sub>4</sub>S: [M+Na]<sup>+</sup>, 375.1606; Found, 375.1597.

### Methyl 5-((3,4-dimethoxybenzoyl)thio)-2-methoxybenzoate (31):

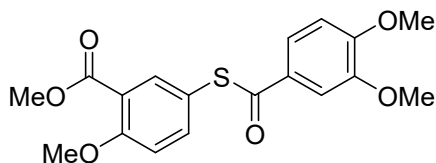

The titled compound was synthesized according to the general procedure **B** and was obtained as a colourless oil.

**Yield:** 69% (75 mg).

**R<sub>f</sub>:** 0.15 (Mobile phase: 20% EtOAc in Hexane).

**<sup>1</sup>H NMR** (500 MHz, CDCl<sub>3</sub>, 300 K): δ (ppm) = 7.92 (d, *J* = 2.5 Hz, 1H), 7.69 (dd, *J* = 8.5, 3.5 Hz, 1H), 7.56 (dd, *J* = 8.75, 2.0 Hz, 1H), 7.45 (d, *J* = 2.0 Hz, 1H), 7.03 (d, *J* = 9.0 Hz, 1H), 6.89 (d, *J* = 8.5 Hz, 1H), 3.93 (s, 3H), 3.92 (s, 3H), 3.90 (s, 3H), 3.85 (s, 3H).

**<sup>13</sup>C NMR** (126 MHz, CDCl<sub>3</sub>, 300 K): δ (ppm) = 189.0, 165.7, 160.3, 153.9, 149.1, 140.6, 138.7, 129.3, 122.1, 120.9, 118.4, 113.0, 110.4, 109.7, 56.3, 56.2, 56.1, 52.2.

**HRMS-ESI** (m/z) calc'd for C<sub>18</sub>H<sub>18</sub>NaO<sub>6</sub>S: [M+Na]<sup>+</sup>, 385.0716; Found, 385.0720.

**Methyl 2-methoxy-5-((3,4,5-trimethoxybenzoyl)thio)benzoate (32):**

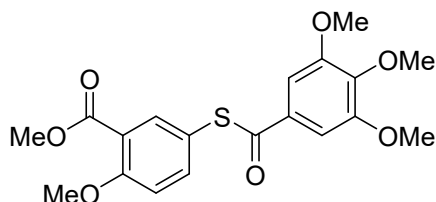

The titled compound was synthesized according to the general procedure **B** and was obtained as a colourless oil.

**Yield:** 71% (84 mg).

**R<sub>f</sub>:** 0.17 (Mobile phase: 20% EtOAc in Hexane).

**<sup>1</sup>H NMR** (500 MHz, CDCl<sub>3</sub>, 300 K): δ (ppm) = 7.97 (d, *J* = 2.5 Hz, 1H), 7.62 (dd, *J* = 8.75, 2.0 Hz, 1H), 7.29 (s, 2H), 7.10 (d, *J* = 8.5 Hz, 1H), 3.99 (s, 3H), 3.97-3.93 (m, 9H), 3.92 (s, 3H).

**<sup>13</sup>C NMR** (126 MHz, CDCl<sub>3</sub>, 300 K): δ (ppm) = 189.6, 165.7, 160.4, 153.3, 143.0, 140.6, 138.7, 131.6, 121.0, 118.1, 113.1, 104.9, 61.1, 56.4, 56.3, 52.3.

**HRMS-ESI** (*m/z*) calc'd for C<sub>19</sub>H<sub>20</sub>NaO<sub>7</sub>S: [M+Na]<sup>+</sup>, 415.0827; Found, 415.0821.

**Methyl 5-((2-(4-isobutylphenyl)propanoyl)thio)-2-methoxybenzoate (33):**

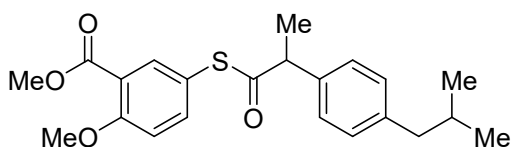

The titled compound was synthesized according to the general procedure **B** under 2 hrs light irradiation and was obtained as a pale yellow oil.

**Yield:** 56% (65 mg).

**R<sub>f</sub>:** 0.54 (Mobile phase: 20% EtOAc in Hexane).

**<sup>1</sup>H NMR** (500 MHz, CDCl<sub>3</sub>, 300 K): δ (ppm) = 7.78 (d, *J* = 2.5 Hz, 1H), 7.42 (dd, *J* = 8.8, 2.5 Hz, 1H), 7.24 (d, *J* = 8.0 Hz, 2H), 7.13 (d, *J* = 8.0 Hz, 2H), 6.97 (d, *J* = 8.5 Hz, 1H), 3.95 (q, *J* = 7.0 Hz, 1H), 3.89 (s, 3H), 3.85 (s, 3H), 2.47 (d, *J* = 7.5 Hz, 2H), 1.91- 1.83 (M, 1H), 1.56 (d, *J* = 7.0 Hz, 3H), 0.91 (d, *J* = 7.0 Hz, 6H).

**<sup>13</sup>C NMR** (126 MHz, CDCl<sub>3</sub>, 300 K): δ (ppm) = 199.7, 165.7, 160.1, 141.3, 140.1, 138.1, 136.6, 129.6, 127.9, 120.8, 118.9, 112.9, 56.2, 53.7, 52.2, 45.2, 30.3, 22.5, 18.7.

**HRMS-ESI** (*m/z*) calc'd for C<sub>22</sub>H<sub>26</sub>NaO<sub>4</sub>S: [M+Na]<sup>+</sup>, 409.1449; Found, 409.1442.

**Methyl 5-((4-(tert-butyl)benzoyl)thio)-2-methoxybenzoate (34):**

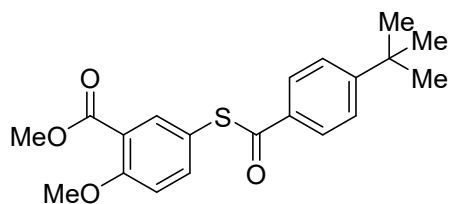

The titled compound was synthesized according to the general procedure **B** and was obtained as a white solid.

**Yield:** 73% (78 mg).

**R<sub>f</sub>:** 0.46 (Mobile phase: 20% EtOAc in Hexane).

**mp:** 105-106°C

**<sup>1</sup>H NMR** (500 MHz, CDCl<sub>3</sub>, 300 K): δ (ppm) = 7.95-7.94 (m, 2H), 7.94 - 7.92 (m, 1H), 7.59 (dd, *J* = 8.5, 2.5 Hz, 1H), 7.49 (d, *J* = 9.0 Hz, 2H), 7.06 (d, *J* = 9.0 Hz, 1H), 3.94 (s, 3H), 3.88 (s, 3H), 1.34 (s, 9H).

**<sup>13</sup>C NMR** (126 MHz, CDCl<sub>3</sub>, 300 K): δ (ppm) = 190.0, 165.7, 160.3, 157.8, 140.7, 138.8, 133.8, 127.8, 125.8, 120.8, 118.3, 113.0, 56.3, 52.3, 35.3, 31.2.

**HRMS-ESI** (m/z) calc'd for C<sub>20</sub>H<sub>22</sub>NaO<sub>4</sub>S: [M+Na]<sup>+</sup>, 381.1136; Found, 381.1124.

**Methyl 2-methoxy-5-((2,4,6-trimethylbenzoyl)thio)benzoate (35):**

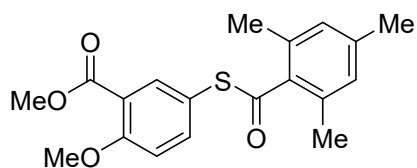

The titled compound was synthesized according to the general procedure **B** and was obtained as a white solid.

**Yield:** 68% (70 mg).

**R<sub>f</sub>:** 0.4 (Mobile phase: 20% EtOAc in Hexane).

**mp:** 101-102°C

**<sup>1</sup>H NMR** (500 MHz, CDCl<sub>3</sub>, 300 K): δ (ppm) = 7.93 (d, *J* = 2.5 Hz, 1H), 7.61 (dd, *J* = 8.5, 2.5 Hz, 1H), 7.07 (d, *J* = 8.5 Hz, 1H), 6.87 (s, 2H), 3.95 (s, 3H), 3.91 (s, 3H), 2.38 (s, 6H), 2.29 (s, 3H).

**<sup>13</sup>C NMR** (126 MHz, CDCl<sub>3</sub>, 300 K): δ (ppm) = 196.5, 165.8, 160.3, 140.0, 139.8, 138.0, 137.0, 133.8, 128.5, 121.0, 118.8, 113.1, 56.3, 52.3, 21.3, 19.2.

**HRMS-ESI** (m/z) calc'd for C<sub>19</sub>H<sub>20</sub>NaO<sub>4</sub>S: [M+Na]<sup>+</sup>, 367.0980; Found, 367.0978.

**Methyl 2-methoxy-5-((3-methylbenzoyl)thio)benzoate (36):**

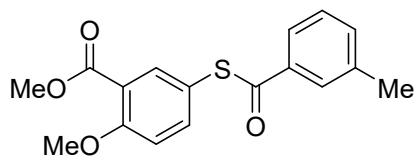

The titled compound was synthesized according to the general procedure **B** and was obtained as a pale yellow oil.

**Yield:** 74% (70 mg).

**R<sub>f</sub>:** 0.37 (Mobile phase: 20% EtOAc in Hexane).

**<sup>1</sup>H NMR** (500 MHz, CDCl<sub>3</sub>, 300 K): δ (ppm) = 7.94 (d, *J* = 2.5 Hz, 1H), 7.82-7.79 (m, 2H), 7.58 (dd, *J* = 8.5, 2.5 Hz, 1H), 7.42-7.38 (m, 1H), 7.35 (t, *J* = 8.5 Hz, 1H), 7.06 (d, *J* = 8.5 Hz, 1H), 3.9 (s, 3H), 3.87 (s, 3H), 2.41 (s, 3H).

**<sup>13</sup>C NMR** (126 MHz, CDCl<sub>3</sub>, 300 K): δ (ppm) = 190.6, 165.7, 160.3, 140.6, 138.8, 138.7, 136.5, 134.7, 128.8, 128.0, 124.8, 120.9, 118.2, 113.1, 56.3, 52.3, 21.4.

**HRMS-ESI** (m/z) calc'd for C<sub>17</sub>H<sub>16</sub>NaO<sub>4</sub>S: [M+Na]<sup>+</sup>, 339.0667; Found, 339.0665.

**Methyl 2-methoxy-5-((2-(trifluoromethyl)benzoyl)thio)benzoate (37):**

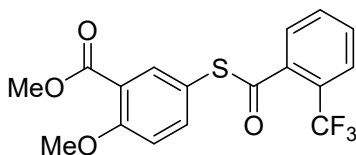

The titled compound was synthesized according to the general procedure **B** and was obtained as a white solid.

**Yield:** 62% (69 mg).

**R<sub>f</sub>:** 0.46 (Mobile phase: 15% EtOAc in Hexane).

**mp:** 118-120°C

**<sup>1</sup>H NMR** (500 MHz, CDCl<sub>3</sub>, 300 K): δ (ppm) = 7.94 (d, *J* = 2.5 Hz, 1H), 7.81-7.73 (m, 2H), 7.65-7.57 (m, 3H), 7.07 (d, *J* = 9.0 Hz, 1H), 3.93 (s, 3H), 3.89 (s, 3H).

**<sup>13</sup>C NMR** (126 MHz, CDCl<sub>3</sub>, 300 K): δ (ppm) = 191.6, 165.6, 160.6, 140.2, 138.2, 137.2, 131.9, 131.5, 128.5, 127.2 (q, *J* = 5.4 Hz), 124.4, 122.2, 121.1, 117.9, 113.3, 56.3, 52.3.

**<sup>19</sup>F NMR** (471 MHz, CDCl<sub>3</sub>, 300 K): δ (ppm) = -58.4.

**HRMS-ESI** (m/z) calc'd for C<sub>17</sub>H<sub>13</sub>F<sub>3</sub>NaO<sub>4</sub>S: [M+Na]<sup>+</sup>, 393.0384; Found, 393.0382.

**Methyl 5-((2-fluorobenzoyl)thio)-2-methoxybenzoate (38):**

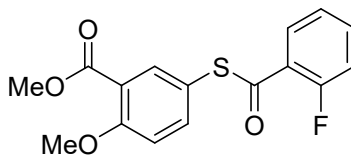

The titled compound was synthesized according to the general procedure **B** and was obtained as a colourless oil.

**Yield:** 67% (64 mg).

**R<sub>f</sub>:** 0.17 (Mobile phase: 10% EtOAc in Hexane).

**<sup>1</sup>H NMR** (500 MHz, CDCl<sub>3</sub>, 300 K): δ (ppm) = 7.95 (d, *J* = 2.0 Hz, 1H), 7.90 (td, *J* = 7.8, 1.5 Hz, 1H), 7.60 (dd, *J* = 8.8, 2.0 Hz, 1H), 7.57-7.52 (m, 1H), 7.25 (td, *J* = 7.8, 0.5 Hz, 1H), 7.18 (t, *J* = 11.0 Hz, 1H), 7.07 (d, *J* = 8.5 Hz, 1H), 3.95 (s, 3H), 3.88 (s, 3H).

**<sup>13</sup>C NMR** (126 MHz, CDCl<sub>3</sub>, 300 K): δ (ppm) = 187.5 (d, *J* = 5.8 Hz), 165.6, 161.7, 160.5, 159.6, 139.6 (d, *J* = 240.4 Hz), 134.9 (d, *J* = 36.5 Hz), 130.0, 124.9 (d, *J* = 11.8 Hz), 124.5 (d, *J* = 3.8 Hz), 120.9, 118.0 (d, *J* = 5.4 Hz), 117.0 (d, *J* = 22.4 Hz), 113.1, 56.3, 52.3.

**<sup>19</sup>F NMR** (471 MHz, CDCl<sub>3</sub>, 300 K): δ (ppm) = -109.51

**HRMS-ESI** (m/z) calc'd for C<sub>16</sub>H<sub>13</sub>NaFO<sub>4</sub>S : [M+H]<sup>+</sup>, 343.0416; Found, 343.0412.

### Methyl 5-((3,4-dichlorobenzoyl)thio)-2-methoxybenzoate (39):

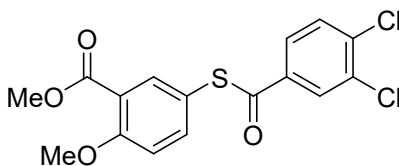

The titled compound was synthesized according to the general procedure **B** and was obtained as a white solid

**Yield:** 60% (67 mg).

**R<sub>f</sub>:** 0.16 (Mobile phase: 10% EtOAc in Hexane).

**mp:** 109-110°C

**<sup>1</sup>H NMR** (500 MHz, CDCl<sub>3</sub>, 300 K): δ (ppm) = 8.07 (d, *J* = 2.5 Hz, 1H), 7.93 (d, *J* = 2.5 Hz, 1H), 7.83 (dd, *J* = 8.3, 2.0 Hz, 2H), 7.59 – 7.54 (m, 2H), 7.08 (d, *J* = 8.5 Hz, 1H), 3.95 (s, 3H), 3.89 (s, 3H).

**<sup>13</sup>C NMR** (126 MHz, CDCl<sub>3</sub>, 300 K): δ (ppm) = 188.5, 165.6, 160.6, 140.5, 138.6, 138.4, 136.0, 133.6, 131.0, 129.4, 126.5, 121.1, 117.1, 113.2, 56.3, 52.3.

**HRMS-ESI** (m/z) calc'd for C<sub>16</sub>H<sub>12</sub>Cl<sub>2</sub>NaO<sub>4</sub>S: [M+Na]<sup>+</sup>, 392.9731; Found, 392.9726.

### Methyl 5-((furan-2-carbonyl)thio)-2-methoxybenzoate (40):

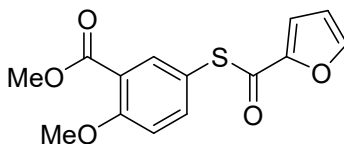

The titled compound was synthesized according to the general procedure **B** and was obtained as a white solid;

**Yield:** 63% (55 mg).

**R<sub>f</sub>:** 0.26 (Mobile phase: 20% EtOAc in Hexane).

**mp:** 82-84°C

**<sup>1</sup>H NMR** (500 MHz, CDCl<sub>3</sub>, 300 K): δ (ppm) = 7.93 (d, *J* = 2.5 Hz, 1H), 7.62 (s, 1H), 7.57 (dd, *J* = 8.5, 2.5 Hz, 1H), 7.25 (d, *J* = 3.5 Hz, 1H), 7.05 (d, *J* = 8.5 Hz, 1H), 6.57 (dd, *J* = 3.5, 1.5 Hz, 1H), 3.94 (s, 3H), 3.87 (s, 3H).

**<sup>13</sup>C NMR** (126 MHz, CDCl<sub>3</sub>, 300 K): δ (ppm) = 179.0, 165.6, 160.5, 150.3, 146.7, 140.7, 138.8, 120.9, 116.8, 116.5, 113.1, 112.6, 56.3, 52.3.

**HRMS-ESI** (m/z) calc'd for C<sub>14</sub>H<sub>12</sub>NaO<sub>5</sub>S: [M+Na]<sup>+</sup>, 315.0303; Found, 315.0299.

#### Methyl 2-methoxy-5-((thiophene-2-carbonyl)thio)benzoate (41):

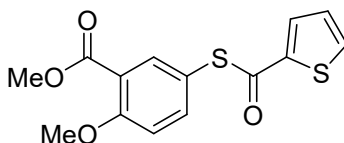

The titled compound was synthesized according to the general procedure **B** and was obtained as a white solid.

**Yield:** 71% (65 mg).

**R<sub>f</sub>:** 0.21 (Mobile phase: 20% EtOAc in Hexane).

**mp:** 71-73°C

**<sup>1</sup>H NMR** (500 MHz, CDCl<sub>3</sub>, 300 K): δ (ppm) = 7.93 (d, *J* = 2.5 Hz, 1H), 7.86 (d, *J* = 3.0 Hz, 1H), 7.64 (d, *J* = 5.0 Hz, 1H), 7.57 (d, *J* = 8.5 Hz, 1H), 7.12 (t, *J* = 4.5 Hz, 1H), 7.03 (d, *J* = 9.0 Hz, 1H), 3.91 (s, 3H), 3.86 (s, 3H).

**<sup>13</sup>C NMR** (126 MHz, CDCl<sub>3</sub>, 300 K): δ (ppm) = 182.3, 165.6, 160.4, 141.1, 140.6, 138.7, 133.6, 131.8, 128.2, 120.9, 117.6, 113.1, 56.3, 52.2.

**HRMS-ESI** (m/z) calc'd for C<sub>14</sub>H<sub>12</sub>NaO<sub>4</sub>S<sub>2</sub>: [M+Na]<sup>+</sup>, 331.0075; Found, 331.0069.

#### Methyl 5-((5-chlorothiophene-2-carbonyl)thio)-2-methoxybenzoate (42):

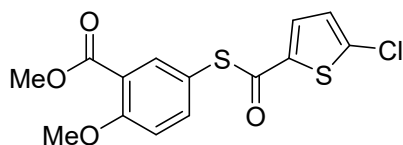

The titled compound was synthesized according to the general procedure **B** and was obtained as a colourless oil.

**Yield:** 52% (53 mg).

**R<sub>f</sub>:** 0.37 (Mobile phase: 20% EtOAc in Hexane).

**<sup>1</sup>H NMR** (500 MHz, CDCl<sub>3</sub>, 300 K): δ (ppm) = 7.94 (d, *J* = 2.0 Hz, 1H), 7.69 (d, *J* = 4.5 Hz, 1H), 7.58 (dd, *J* = 10.0, 2.5 Hz, 1H), 7.06 (d, *J* = 8.5 Hz, 1H), 6.99 (d, *J* = 4.5 Hz, 1H), 3.95 (s, 3H), 3.88 (s, 3H).

**<sup>13</sup>C NMR** (126 MHz, CDCl<sub>3</sub>, 300 K): δ (ppm) = 181.6, 165.6, 160.6, 140.6, 139.5, 139.4, 138.8, 131.3, 127.6, 121.0, 117.0, 113.1, 56.3, 52.3.

**HRMS-ESI** (m/z) calc'd for C<sub>14</sub>H<sub>11</sub>ClNaO<sub>4</sub>S<sub>2</sub>: [M+Na]<sup>+</sup>, 364.9685; Found, 364.9686.

### S-(3-iodo-4-methoxyphenyl) 5-chlorothiophene-2-carbothioate (**43**):

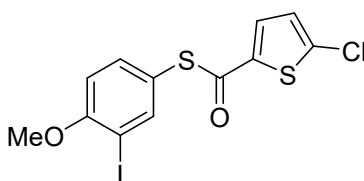

The titled compound was synthesized according to the general procedure **B** and was obtained as a colourless oil.

**Yield:** 44% (54 mg).

**R<sub>f</sub>:** 0.4 (Mobile phase: 5% EtOAc in Hexane).

**<sup>1</sup>H NMR** (500 MHz, CDCl<sub>3</sub>, 300 K): δ (ppm) = 7.88 (d, *J* = 2.5 Hz, 1H), 7.68 (d, *J* = 4.0 Hz, 1H), 7.44 (dd, *J* = 8.5, 2.0 Hz, 1H), 6.99 (d, *J* = 4.5 Hz, 1H), 6.88 (d, *J* = 9.0 Hz, 1H), 3.92 (s, 3H).

**<sup>13</sup>C NMR** (126 MHz, CDCl<sub>3</sub>, 300 K): δ (ppm) = 181.6, 159.6, 145.6, 139.5, 139.3, 136.9, 131.3, 127.6, 118.7, 111.3, 86.4, 56.6.

**HRMS-ESI** (m/z) calc'd for C<sub>12</sub>H<sub>8</sub>ClNaIO<sub>2</sub>S<sub>2</sub>: [M+Na]<sup>+</sup>, 432.8597; Found, 432.8588.

**Methyl 5-(benzoylthio)-2-methoxybenzoate (44):**

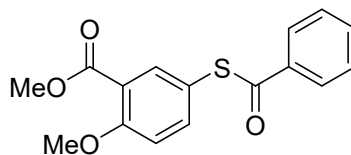

The titled compound was synthesized according to the general procedure **B** was obtained as a white solid.

**Yield:** 81% (74 mg).

**R<sub>f</sub>:** 0.48 (Mobile phase: 20% EtOAc in Hexane).

**mp:** 84-87°C

**<sup>1</sup>H NMR** (500 MHz, CDCl<sub>3</sub>, 300 K): δ (ppm) = 8.0 (dd, *J* = 8.5, 1.5 Hz, 2H), 7.95 (d, *J* = 2.5 Hz, 1H), 7.61-7.57 (m, 2H), 7.47 (t, *J* = 8.0 Hz, 2H), 7.06 (d, *J* = 9.0 Hz, 1H), 3.93 (s, 3H), 3.87 (s, 3H).

**<sup>13</sup>C NMR** (126 MHz, CDCl<sub>3</sub>, 300 K): δ (ppm) = 190.5, 165.7, 160.4, 140.7, 138.7, 136.4, 133.9, 128.9, 127.6, 120.9, 118.0, 113.1, 56.3, 52.3.

**HRMS-ESI** (*m/z*) calc'd for C<sub>16</sub>H<sub>14</sub>NaO<sub>4</sub>S: [M+Na]<sup>+</sup>, 325.0510; Found, 325.0503.

**S-(3-chloro-4-methoxyphenyl) benzothioate (45):**

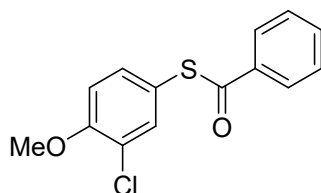

The titled compound was synthesized according to the general procedure **B** and was obtained as a white solid.

**Yield:** 79% (66 mg)

**R<sub>f</sub>:** 0.45 (Mobile phase: 10% EtOAc in Hexane).

**mp:** 103-105°C

**<sup>1</sup>H NMR** (500 MHz, CDCl<sub>3</sub>, 300 K): δ (ppm) = 8.0 (d, *J* = 7.5 Hz, 2H), 7.61 (tt, *J* = 7.5, 1.5 Hz, 1H), 7.52 (d, *J* = 2.0 Hz, 1H), 7.49 (tt, *J* = 8.0, 1.5 Hz, 2H), 7.37 (dd, *J* = 8.25, 2.5 Hz, 1H), 6.99 (d, *J* = 8.5 Hz, 1H), 3.94 (s, 3H).

**<sup>13</sup>C NMR** (126 MHz, CDCl<sub>3</sub>, 300 K): δ (ppm) = 190.5, 156.3, 136.7, 136.4, 135.2, 133.9, 128.9, 127.6, 123.2, 118.9, 112.6, 56.4.

**HRMS-ESI** (*m/z*) calc'd for C<sub>14</sub>H<sub>11</sub>ClNaO<sub>2</sub>S: [M+Na]<sup>+</sup>, 301.0066; Found, 301.0075.

**Methyl 2-(4'-(benzoylthio)-2-fluoro-[1,1'-biphenyl]-4-yl)propanoate (46):**



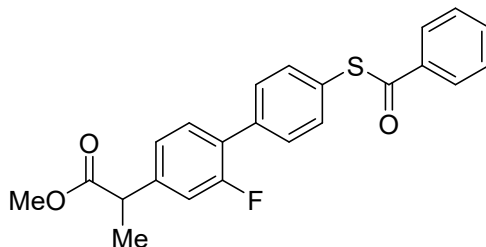

The titled compound was synthesized according to the general procedure **B** and was obtained as a white solid.

**Yield:** 76% (78 mg)

**R<sub>f</sub>:** 0.19 (Mobile phase: 5% EtOAc in Hexane).

**mp:** 106-108°C

**<sup>1</sup>H NMR** (500 MHz, CDCl<sub>3</sub>, 300 K): δ (ppm) = 8.06 (d, *J* = 8.25 Hz, 2H), 7.65-7.58 (m, 5H), 7.50 (t, *J* = 8.0 Hz, 2H), 7.44 (t, *J* = 8.0 Hz, 1H), 7.20-7.13 (m, 2H), 3.78 (q, *J* = 7.0 Hz, 1H), 3.71 (s, 3H), 1.55 (d, *J* = 7.0 Hz, 3H).

**<sup>13</sup>C NMR** (126 MHz, CDCl<sub>3</sub>, 300 K): δ (ppm) = 190.2, 174.5, 159.8 (d, *J* = 252.0 Hz), 142.49 (d, *J* = 31.5 Hz), 136.75 (d, *J* = 25.2 Hz), 135.2, 133.9, 130.88 (d, *J* = 4.2 Hz), 129.9 (d, *J* = 3.7 Hz), 128.9, 127.6, 127.0, 126.8 (d, *J* = 11.8 Hz), 123.8 (d, *J* = 3.7 Hz), 115.6, 115.4, 52.4, 45.0, 18.5.

**<sup>19</sup>F NMR** (471 MHz, CDCl<sub>3</sub>, 300 K): δ (ppm) = -116.9.

**HRMS-ESI** (*m/z*) calc'd for C<sub>23</sub>H<sub>20</sub>FO<sub>3</sub>S: [M+H]<sup>+</sup>, 395.1072; Found, 395.1116.

**Methyl 2-(2-(benzoylthio)-4-chlorophenoxy)acetate (47):**

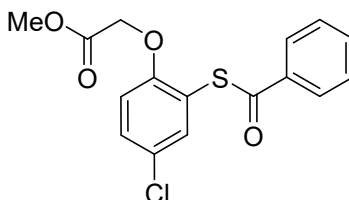

The titled compound was synthesized according to the general procedure **B** and was obtained as a colourless oil.

**Yield:** 72% (73 mg)

**R<sub>f</sub>:** 0.28 (Mobile phase: 20% EtOAc in Hexane).

**<sup>1</sup>H NMR** (500 MHz, CDCl<sub>3</sub>, 300 K): δ (ppm) = 8.03 (dd, *J* = 8.25, 1.0 Hz, 2H), 7.60 (t, *J* = 7.5 Hz, 1H), 7.51 (d, *J* = 2.5 Hz, 1H), 7.47 (t, *J* = 7.5 Hz, 2H), 7.36 (dd, *J* = 9.0, 2.5 Hz, 1H), 6.84 (d, *J* = 9.0 Hz, 1H), 4.65 (s, 3H), 3.69 (s, 3H).

**<sup>13</sup>C NMR** (126 MHz, CDCl<sub>3</sub>, 300 K): δ (ppm) = 188.6, 168.7, 157.0, 136.7, 136.5, 133.9, 131.4, 128.9, 127.7, 127.0, 118.6, 114.3, 66.5, 52.4.

**HRMS-ESI** (*m/z*) calc'd for C<sub>16</sub>H<sub>13</sub>ClNaO<sub>4</sub>S: [M+Na]<sup>+</sup>, 359.0116; Found, 359.0118.

**S-(4-(4-(2-(pyridin-2-yloxy)propoxy)phenoxy)phenyl) 3,4,5-trimethoxybenzothioate (48):**

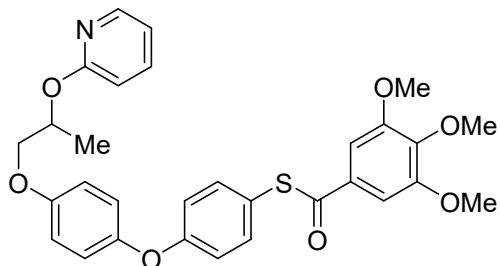

The titled compound was synthesized according to the general procedure **B** under 2 hr light irradiation and was obtained as a light brown oil.

**Yield:** 60% (98 mg).

**R<sub>f</sub>:** 0.53 (Mobile phase: 30% EtOAc in Hexane).

**<sup>1</sup>H NMR** (500 MHz, CDCl<sub>3</sub>, 300 K): δ (ppm) = 8.17-8.13 (m, 1H), 7.61-7.51 (m, 2H), 7.40 (dt, *J* = 8.5, 3.0 Hz, 2H), 7.27 (s, 1H), 7.03-6.97 (m, 6H), 6.87-6.84 (m, 1H), 6.74 (d, *J* = 8.0 Hz, 1H), 5.59 (sx, *J* = 6.5 Hz, 1H), 4.20 (dd, *J* = 9.75, 5.5 Hz, 1H), 4.09 (dd, *J* = 9.5, 4.5 Hz, 1H), 3.96-3.90 (m, 9H), 1.49 (d, *J* = 6.0 Hz, 3H).

**<sup>13</sup>C NMR** (126 MHz, CDCl<sub>3</sub>, 300 K): δ (ppm) = 190.0, 163.2, 160.2, 155.8, 153.3, 149.2, 146.9, 142.9, 138.8, 136.7, 131.8, 121.5, 119.8, 117.9, 116.9, 116.0, 111.8, 104.8, 71.1, 69.3, 61.1, 56.4, 17.1.

**HRMS-ESI** (*m/z*) calc'd for C<sub>30</sub>H<sub>30</sub>O<sub>7</sub>S: [M+H]<sup>+</sup>, 548.1698; Found, 548.1734.

## 5.2. NMR spectra

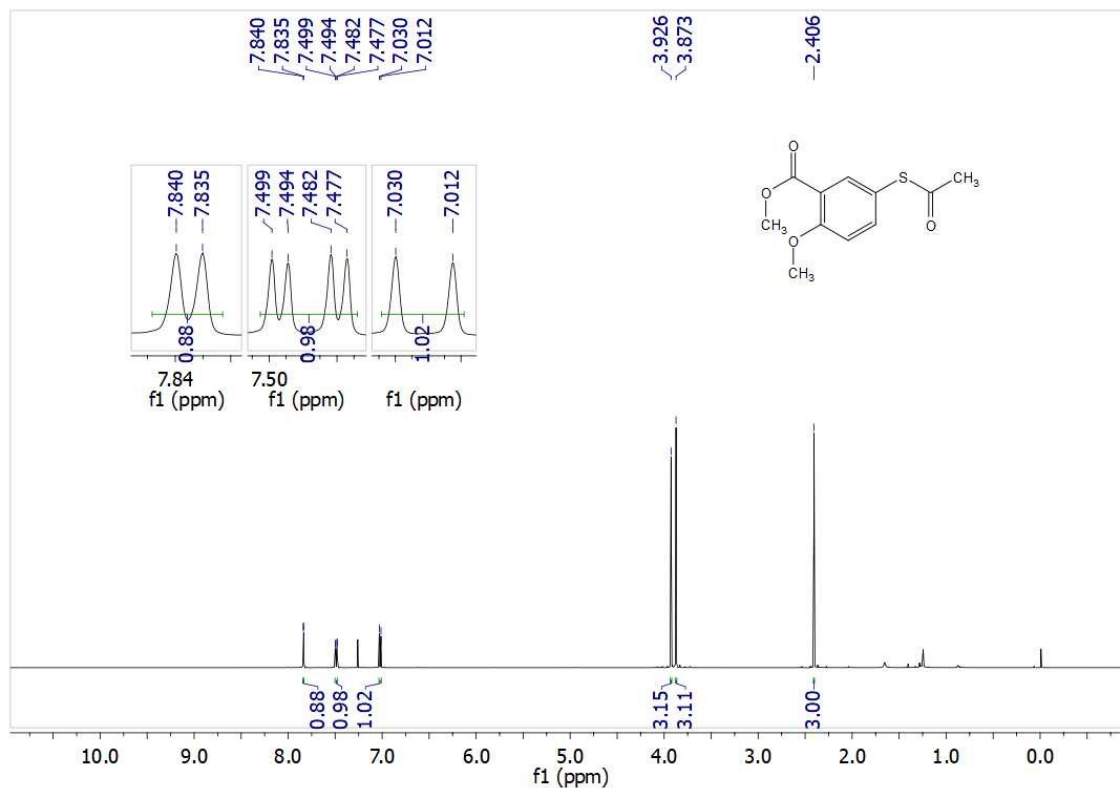

<sup>1</sup>H NMR (500 MHz, CDCl<sub>3</sub>) of compound **3**.

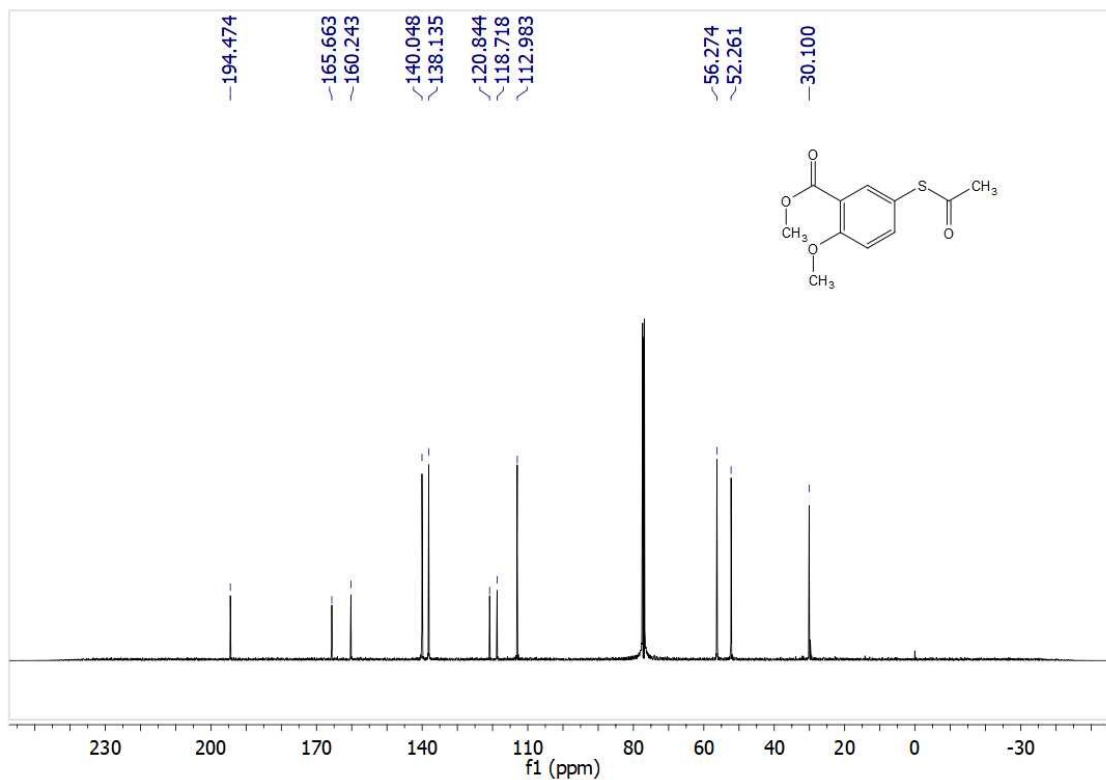

<sup>13</sup>C NMR (126 MHz, CDCl<sub>3</sub>) of compound 3.

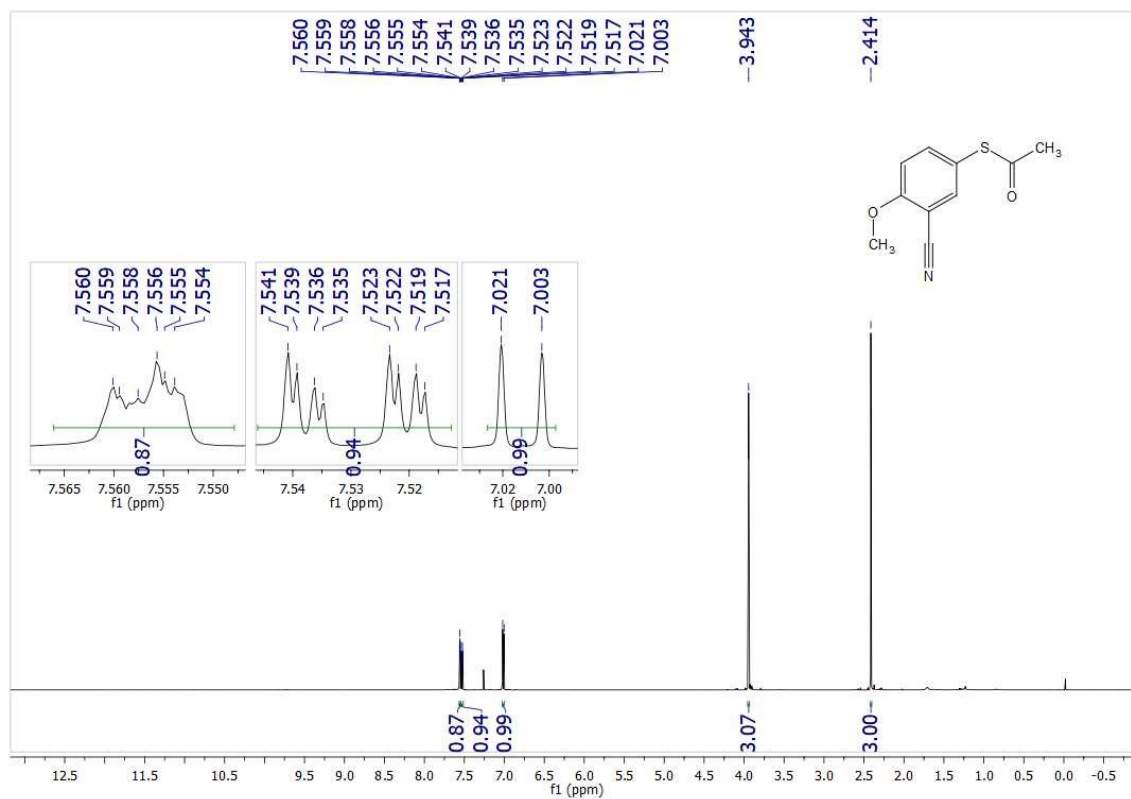

$^1\text{H}$  NMR (500 MHz,  $\text{CDCl}_3$ ) of compound 4.

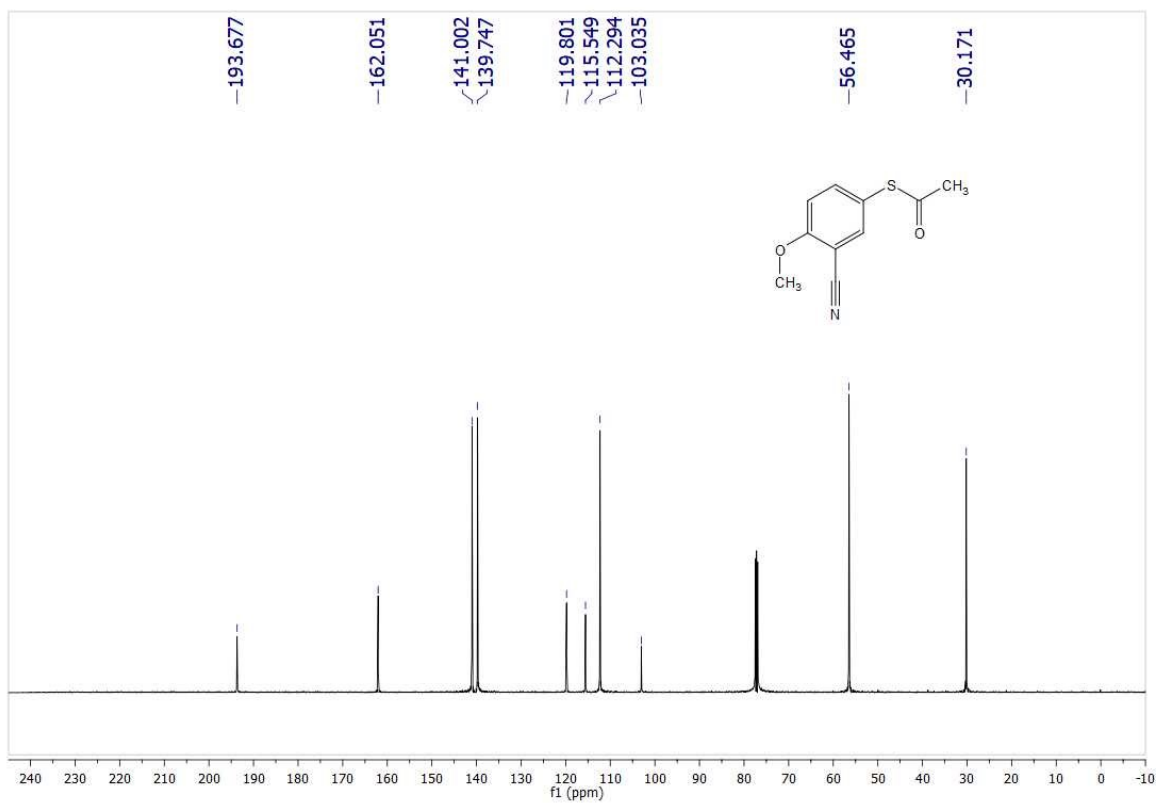

$^{13}\text{C}$  NMR (126 MHz,  $\text{CDCl}_3$ ) of compound 4.

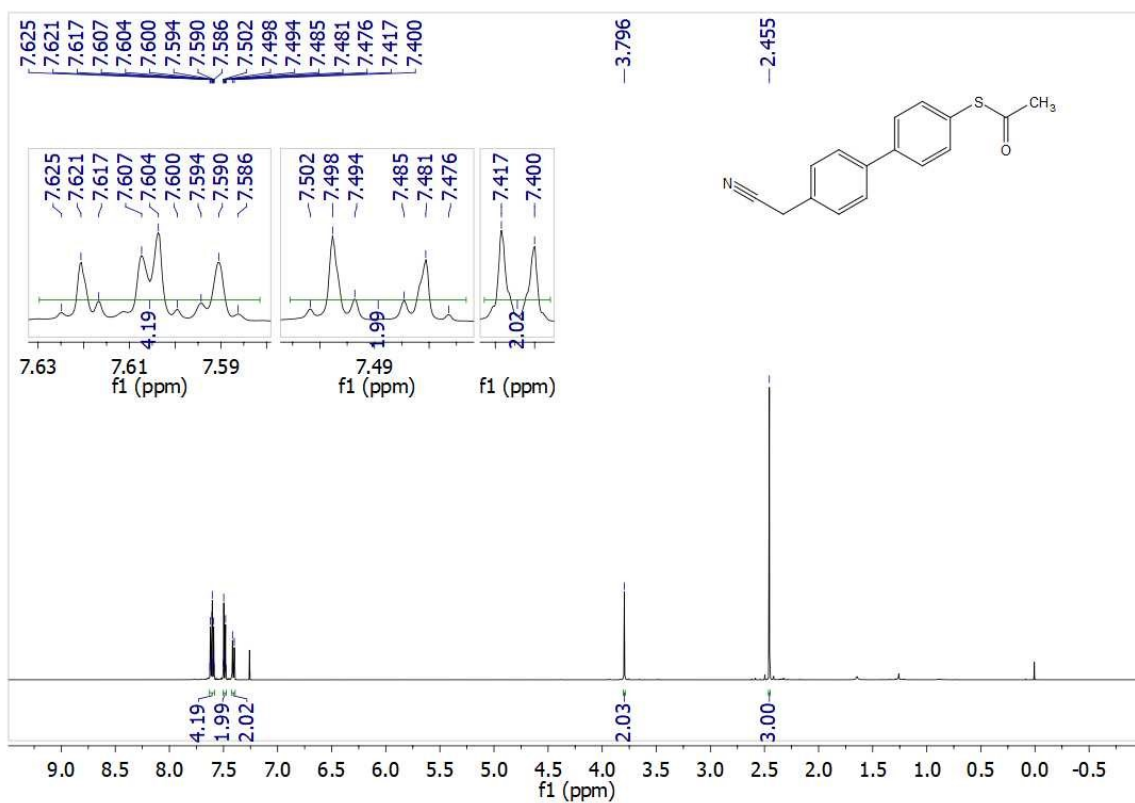

$^1\text{H}$  NMR (500 MHz,  $\text{CDCl}_3$ ) of compound 5.

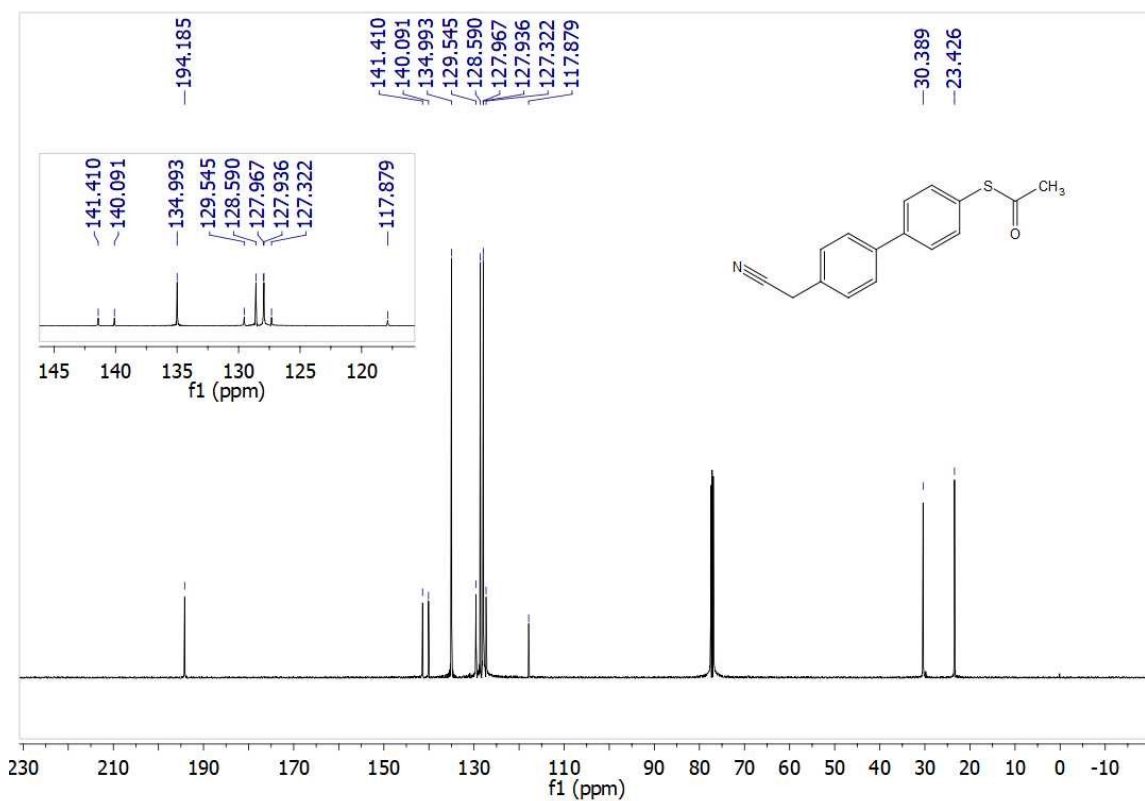

$^1\text{H}$  NMR (500 MHz,  $\text{CDCl}_3$ ) of compound 5.

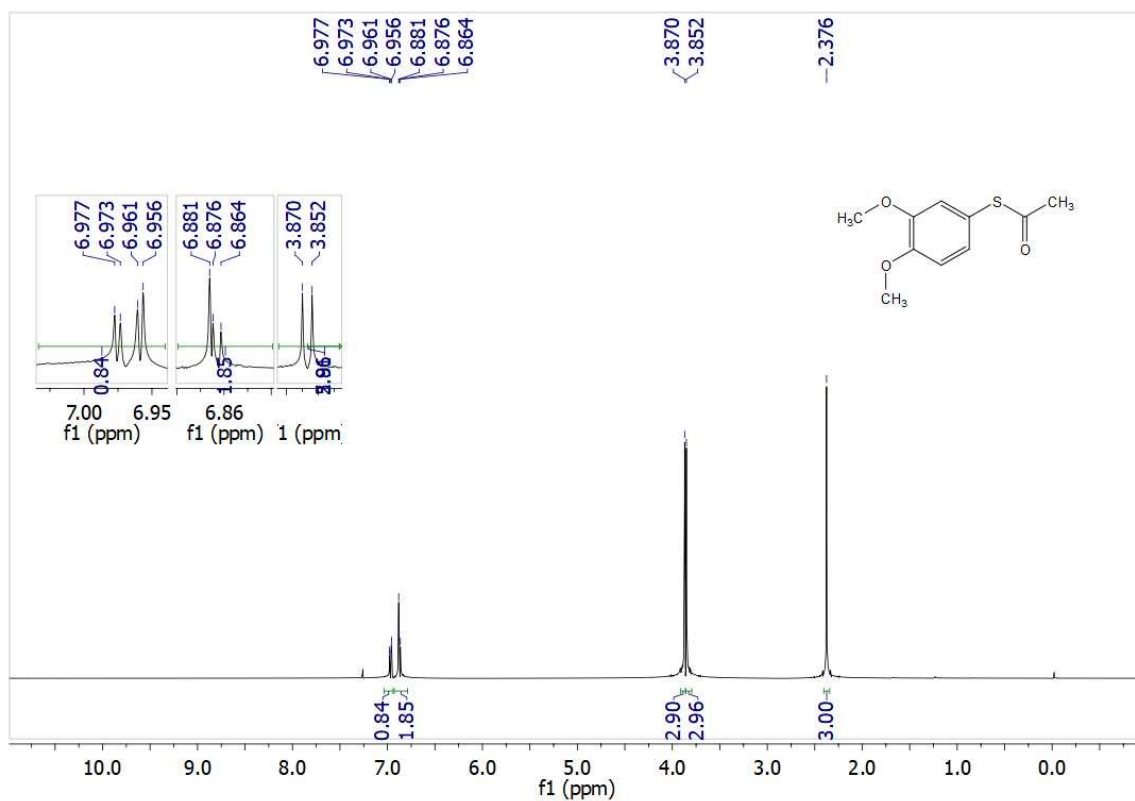

$^1\text{H}$  NMR (500 MHz,  $\text{CDCl}_3$ ) of compound 6.

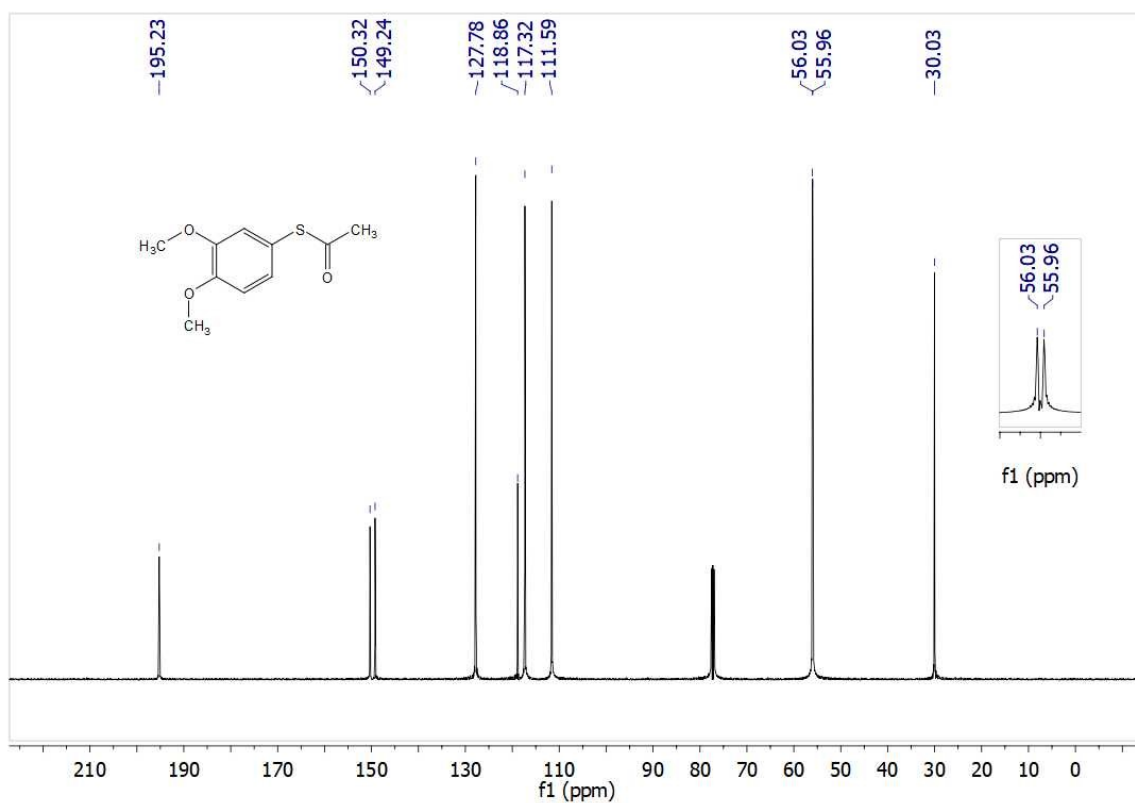

$^{13}\text{C}$  NMR (126 MHz,  $\text{CDCl}_3$ ) of compound 6.

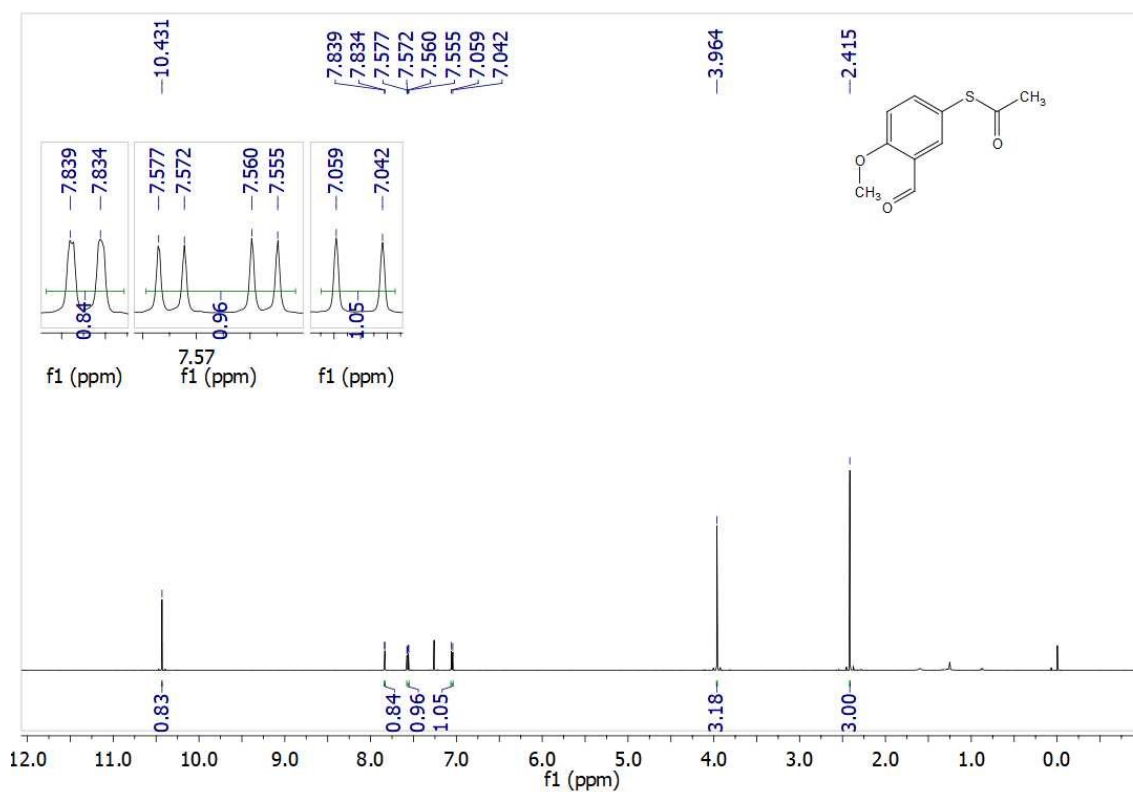

$^1\text{H}$  NMR (500 MHz,  $\text{CDCl}_3$ ) of compound 7.

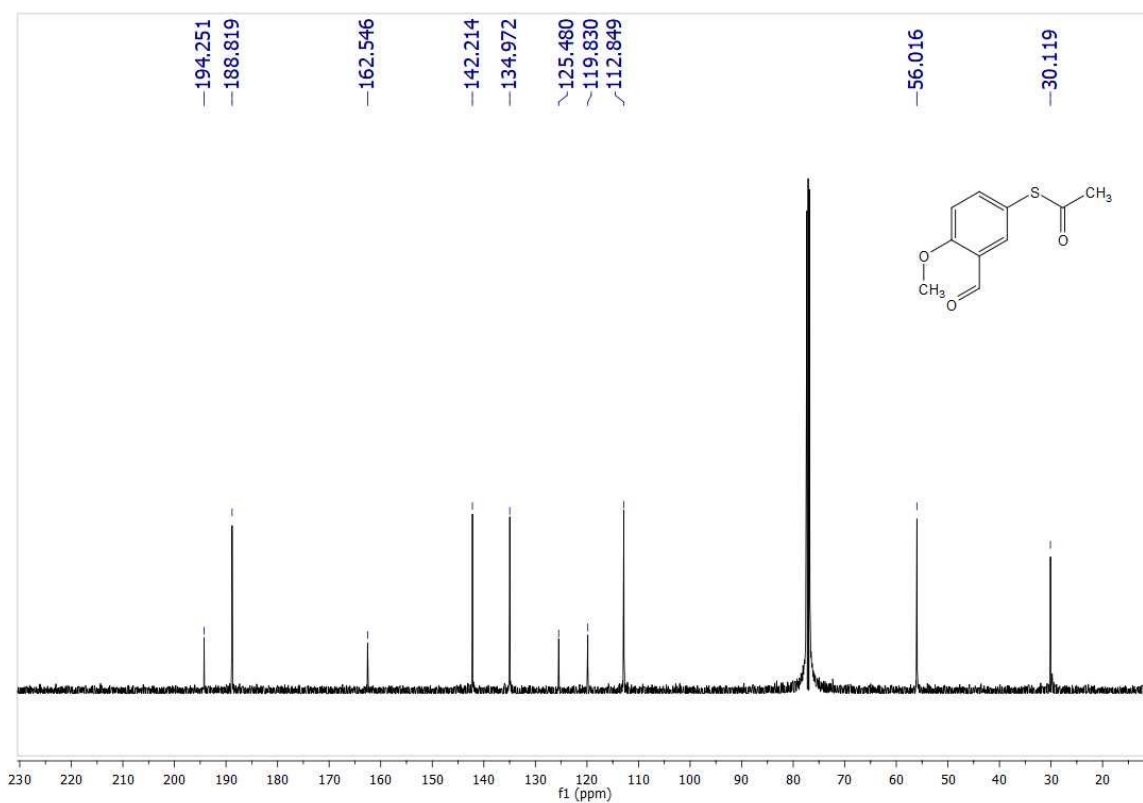

$^{13}\text{C}$  NMR (126 MHz,  $\text{CDCl}_3$ ) of compound 7.

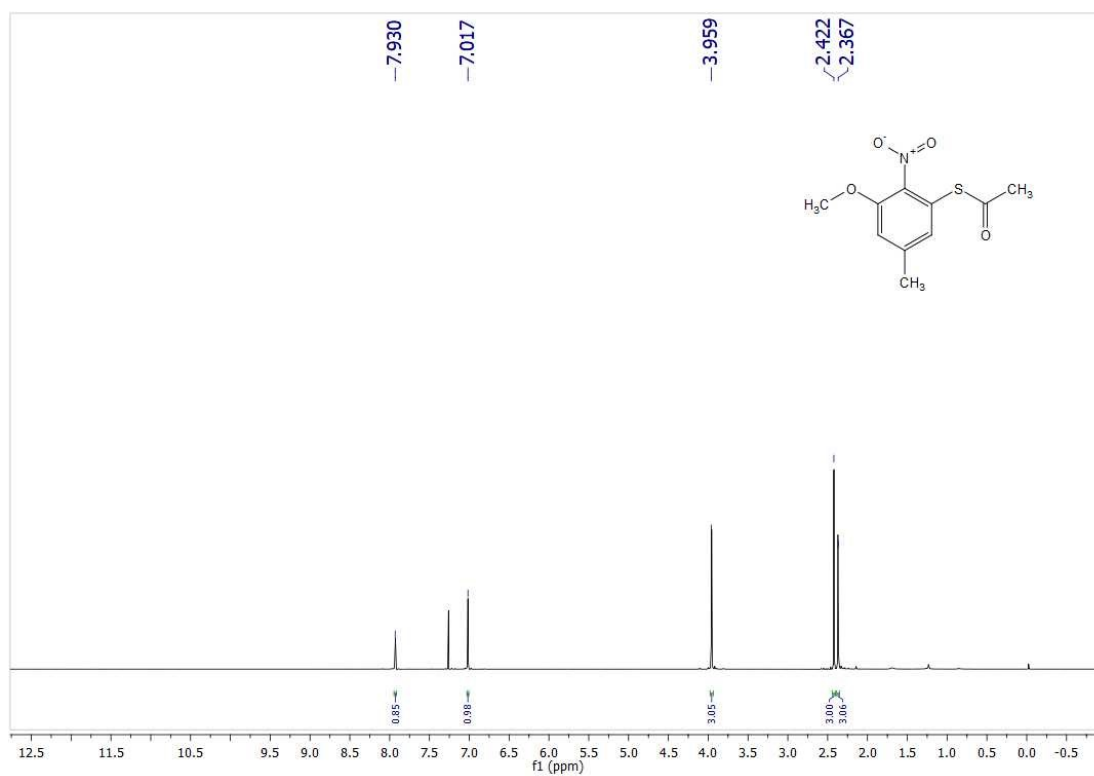

$^1\text{H}$  NMR (500 MHz,  $\text{CDCl}_3$ ) of compound **8**.

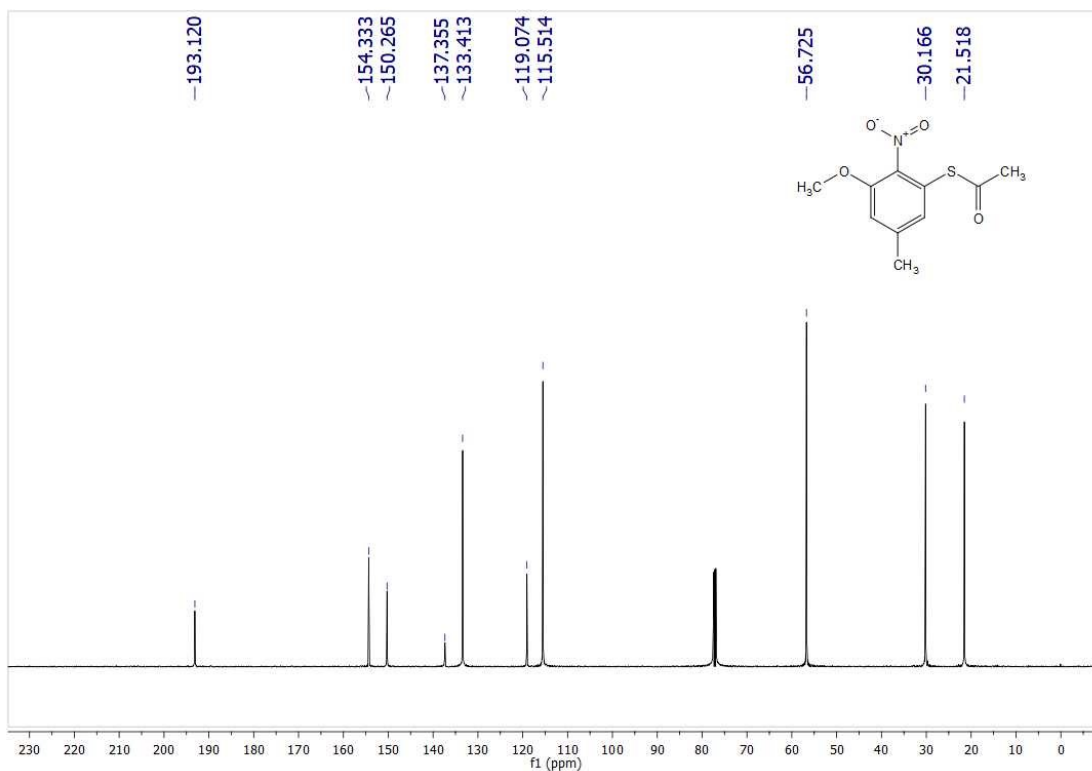

$^{13}\text{C}$  NMR (126 MHz,  $\text{CDCl}_3$ ) of compound **8**.

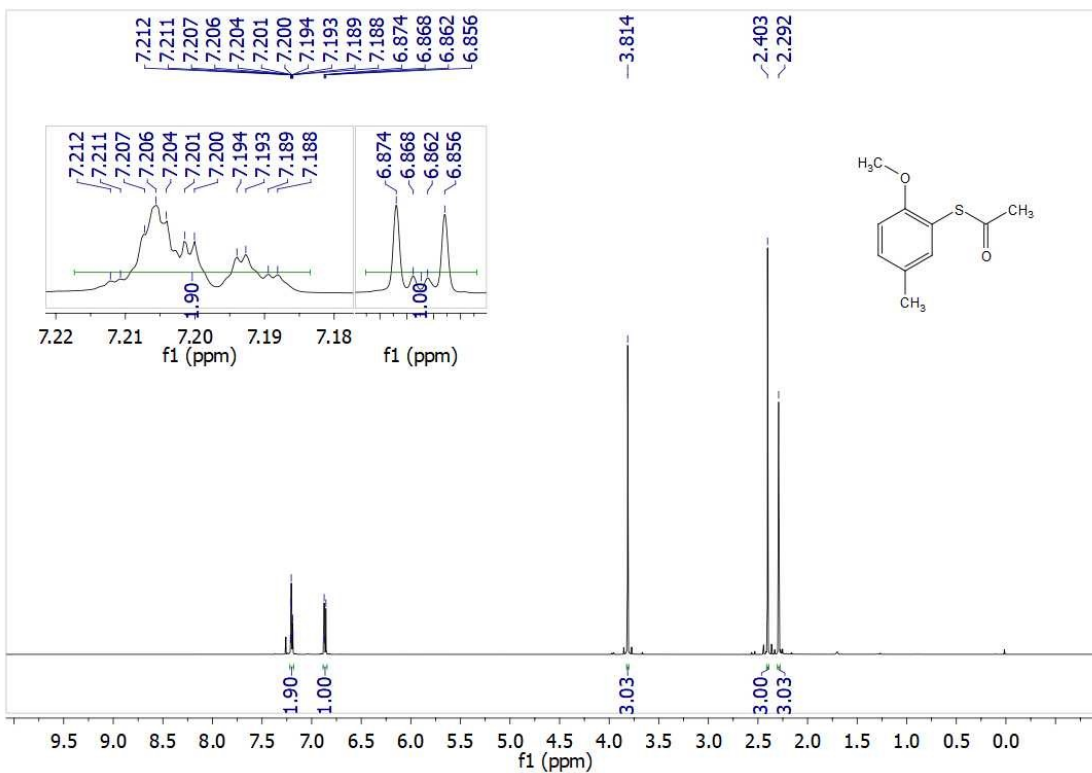

$^1\text{H}$  NMR (500 MHz,  $\text{CDCl}_3$ ) of compound **9**.



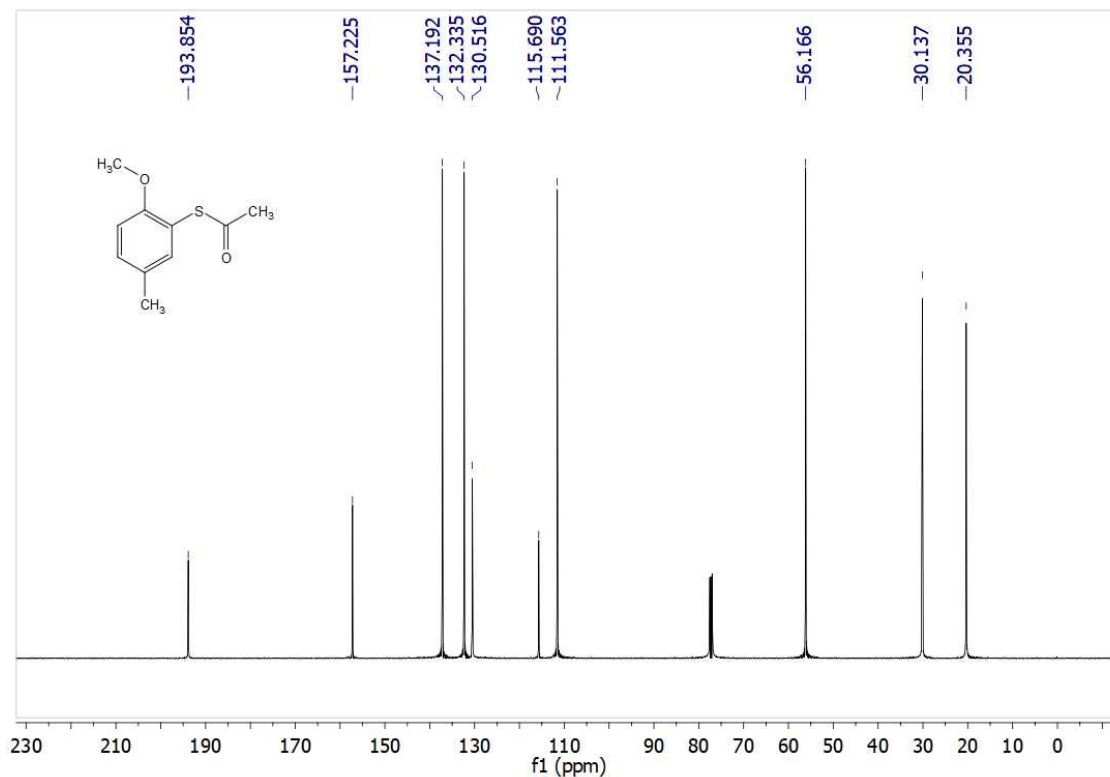

<sup>13</sup>C NMR (126 MHz, CDCl<sub>3</sub>) of compound 9.

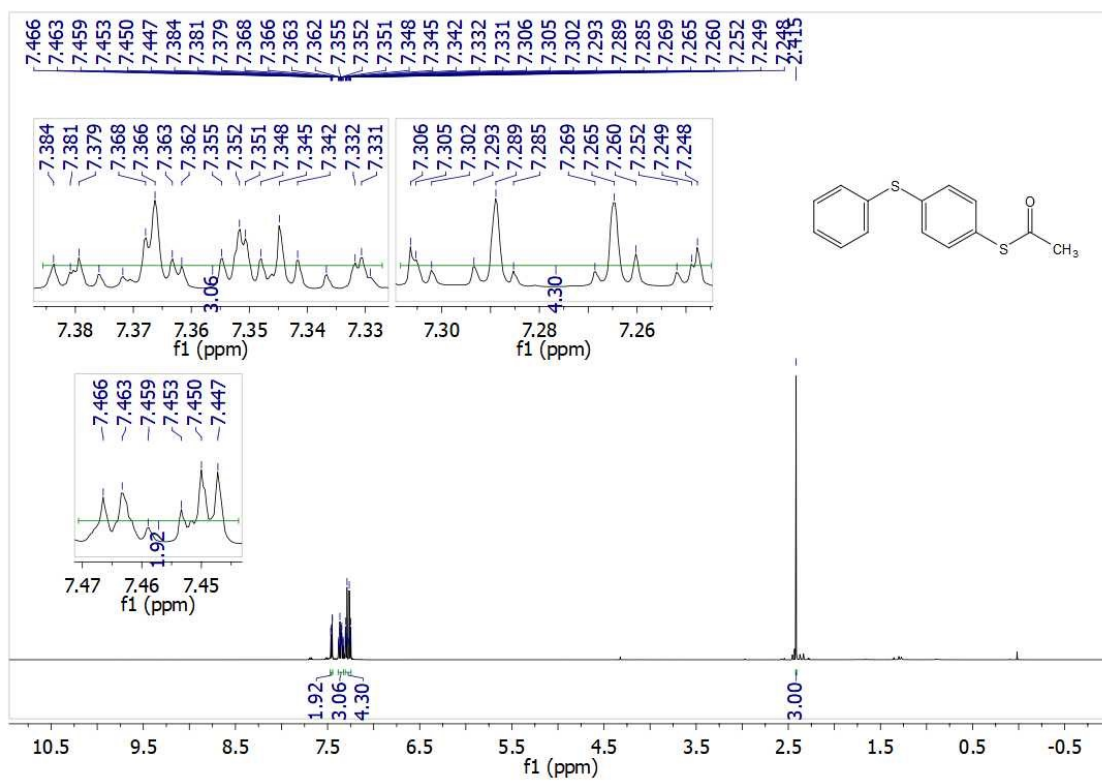

<sup>1</sup>H NMR (500 MHz, CDCl<sub>3</sub>) of compound 10.

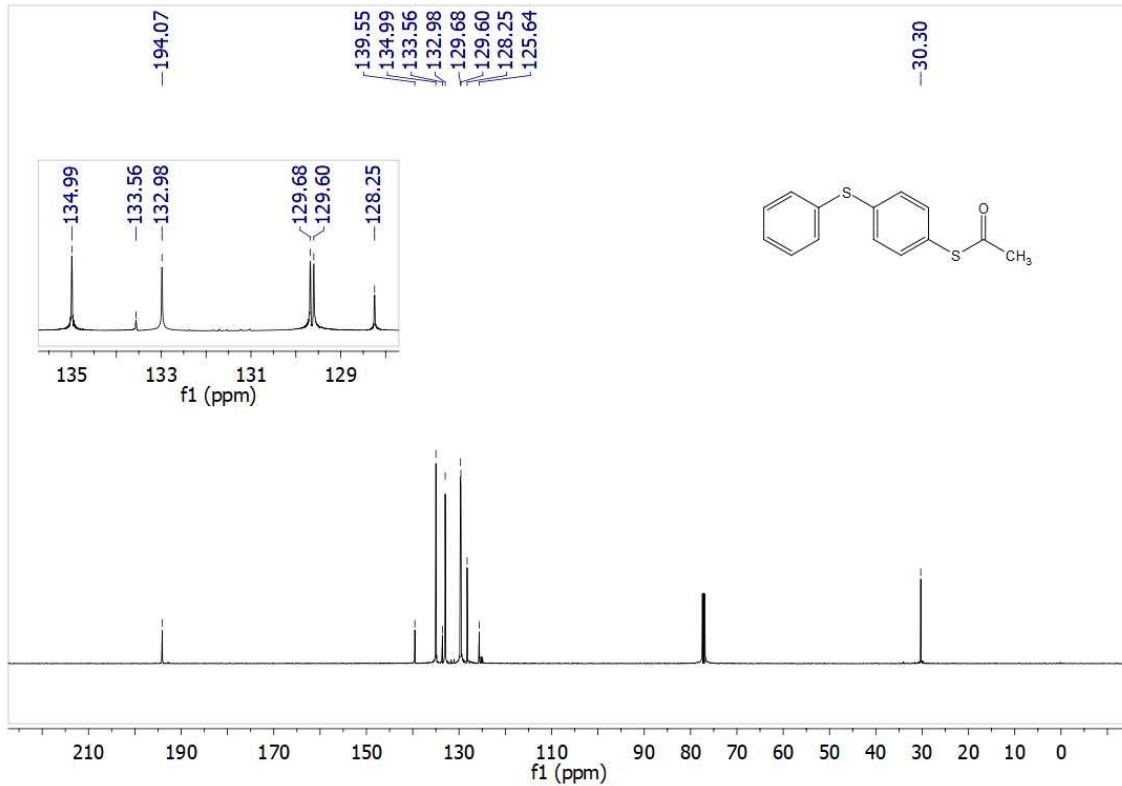

$^{13}\text{C}$  NMR (126 MHz,  $\text{CDCl}_3$ ) of compound 10.

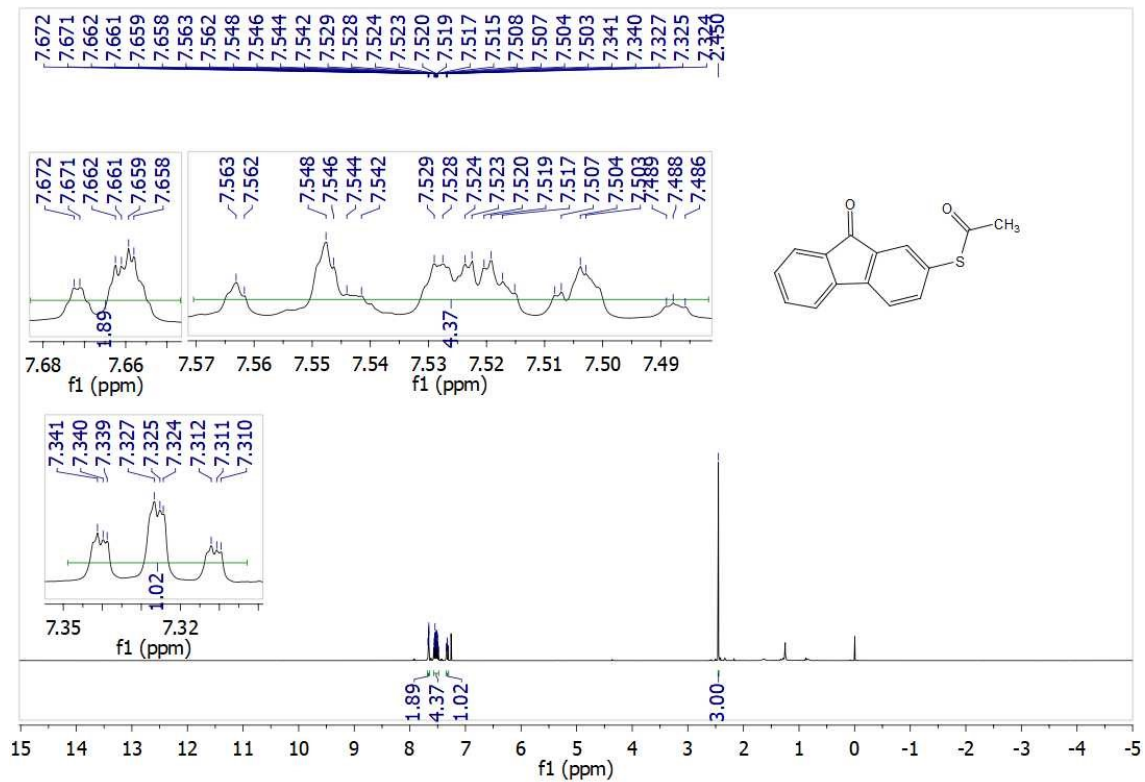

<sup>1</sup>H NMR (500 MHz, CDCl<sub>3</sub>) of compound **11**.

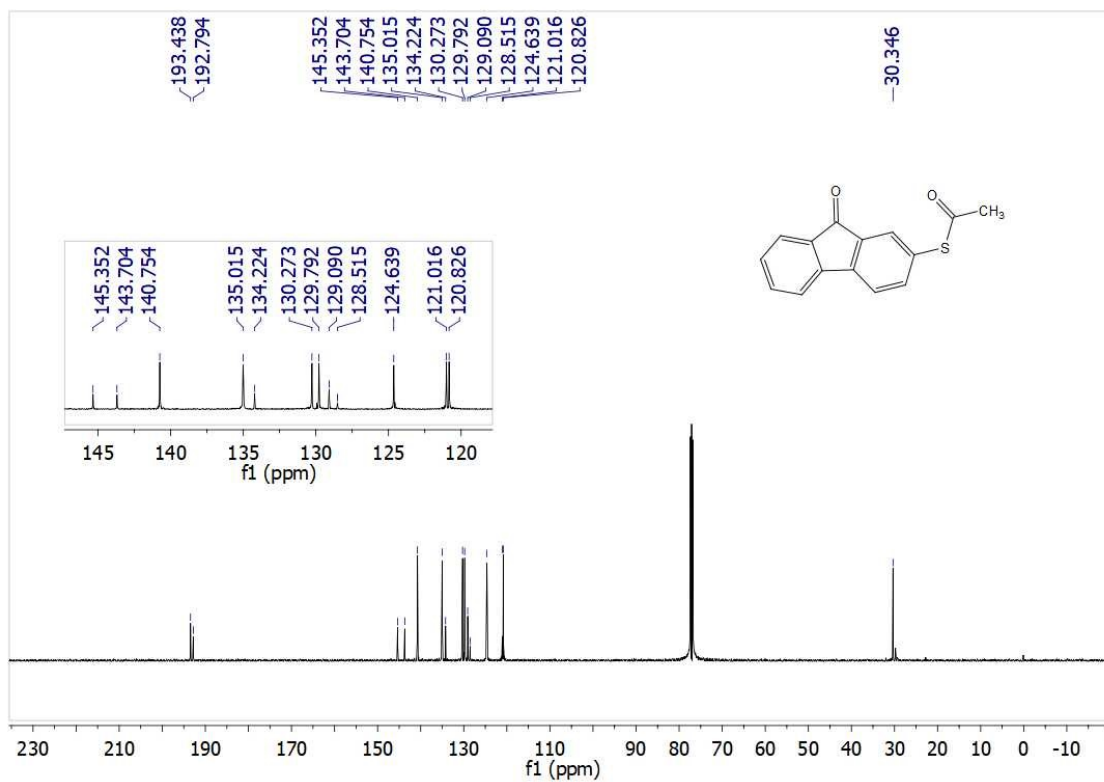

<sup>1</sup>H NMR (500 MHz, CDCl<sub>3</sub>) of compound **11**.

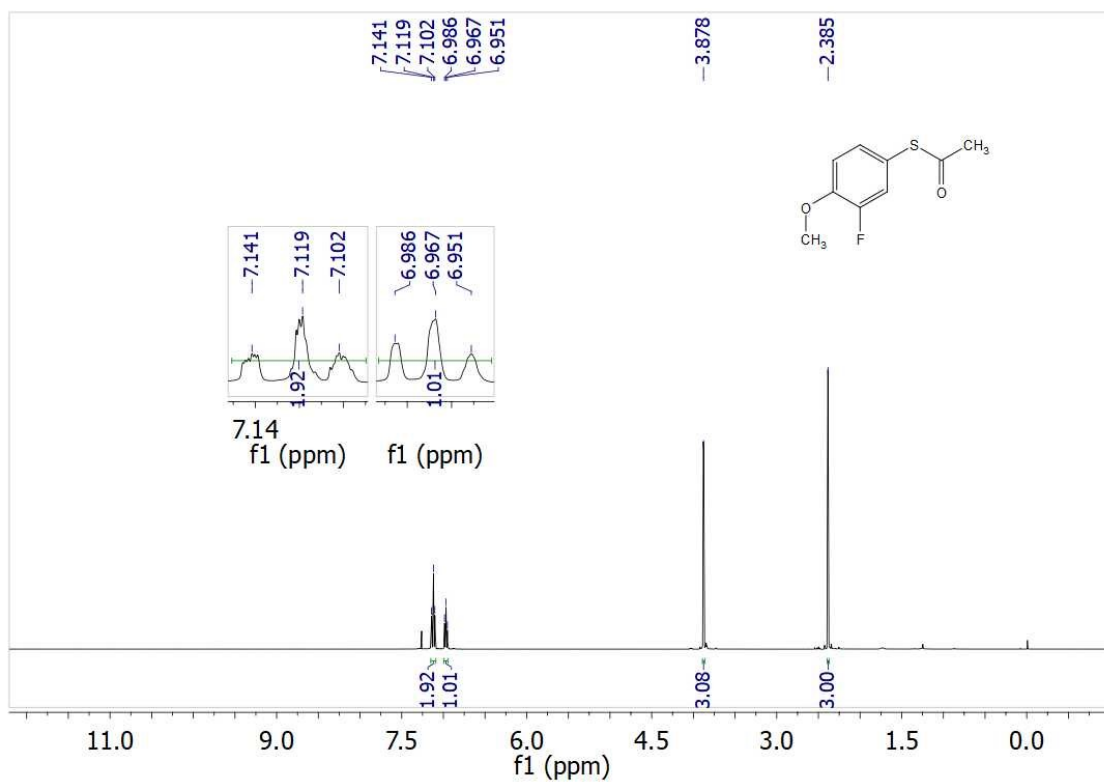

$^1\text{H}$  NMR (500 MHz,  $\text{CDCl}_3$ ) of compound **12**.

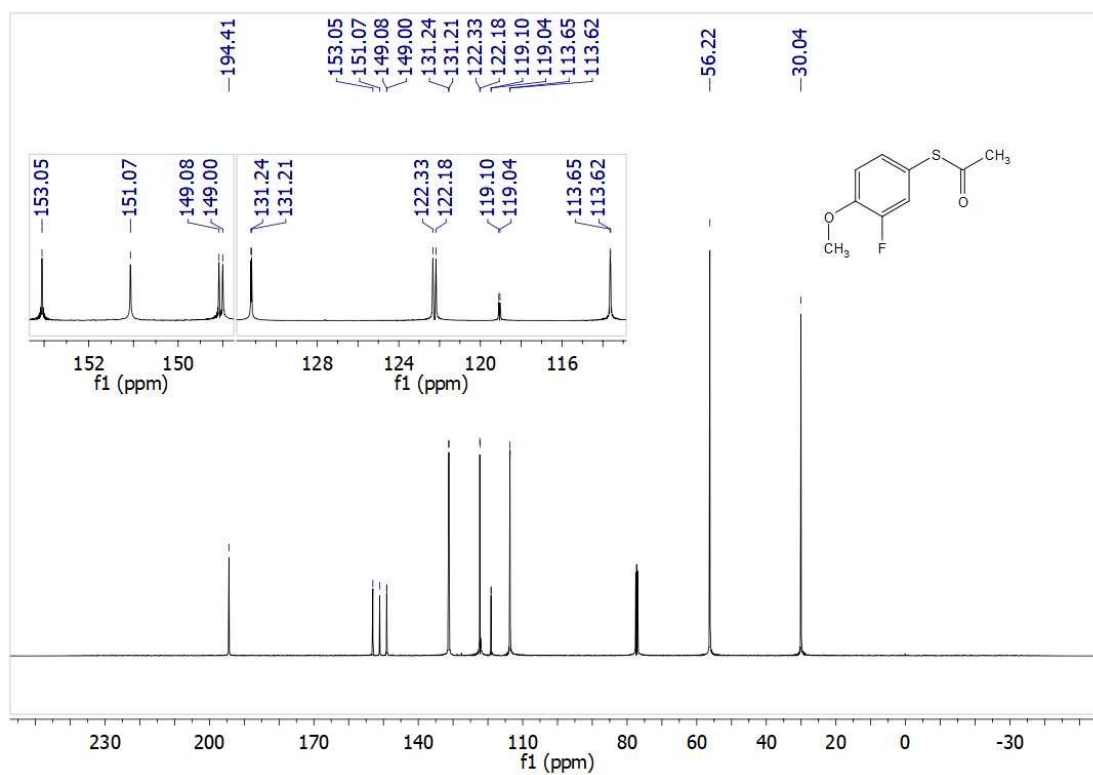

$^{13}\text{C}$  NMR (126 MHz,  $\text{CDCl}_3$ ) of compound **12**.

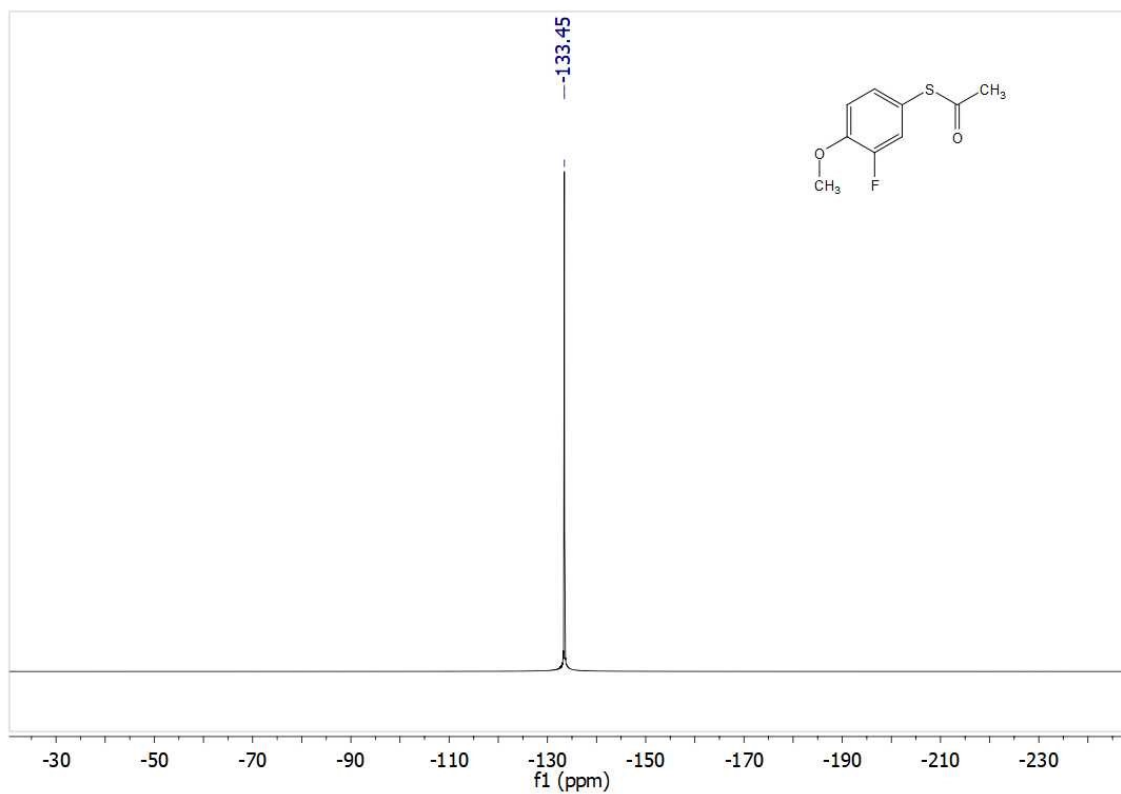

$^{19}\text{F}$  NMR (472 MHz,  $\text{CDCl}_3$ ) of compound **12**.

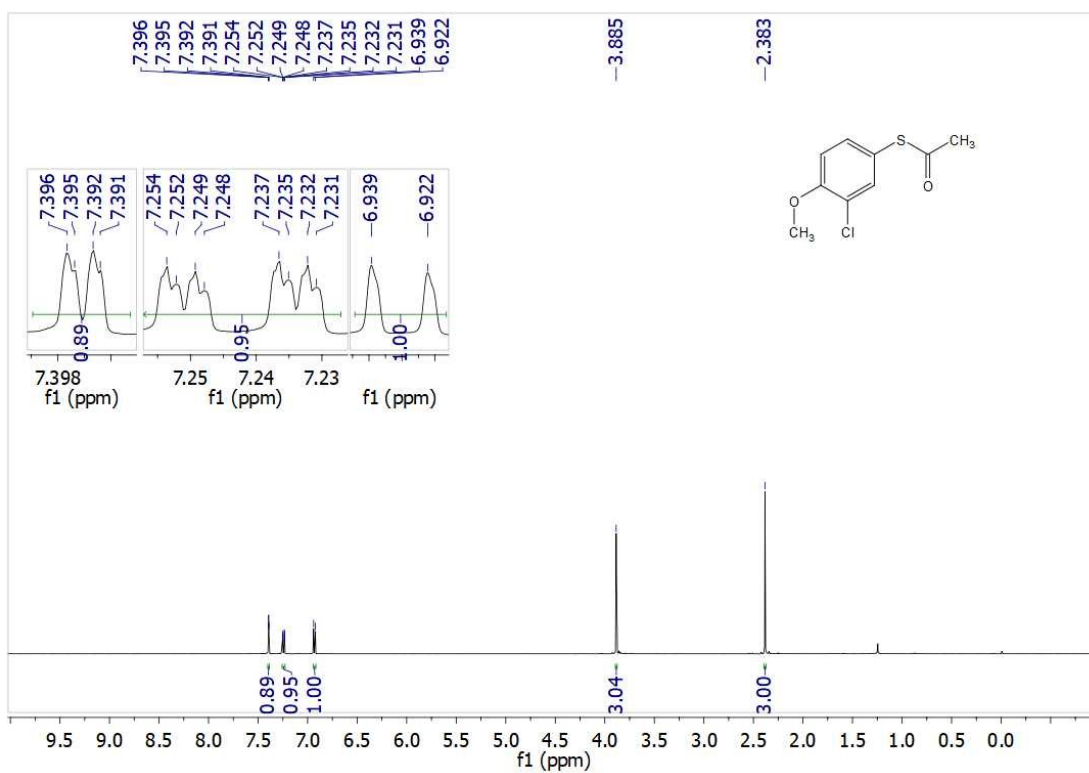

$^1\text{H}$  NMR (500 MHz,  $\text{CDCl}_3$ ) of compound **13**.

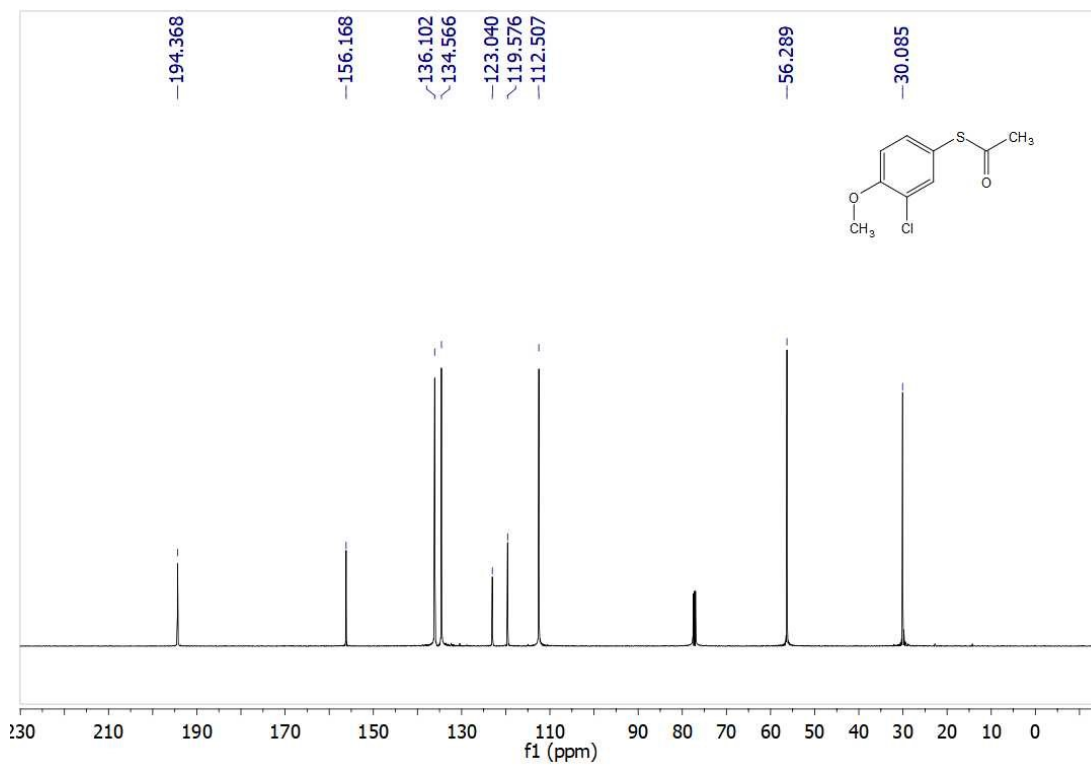

$^{13}\text{C}$  NMR (126 MHz,  $\text{CDCl}_3$ ) of compound **13**.

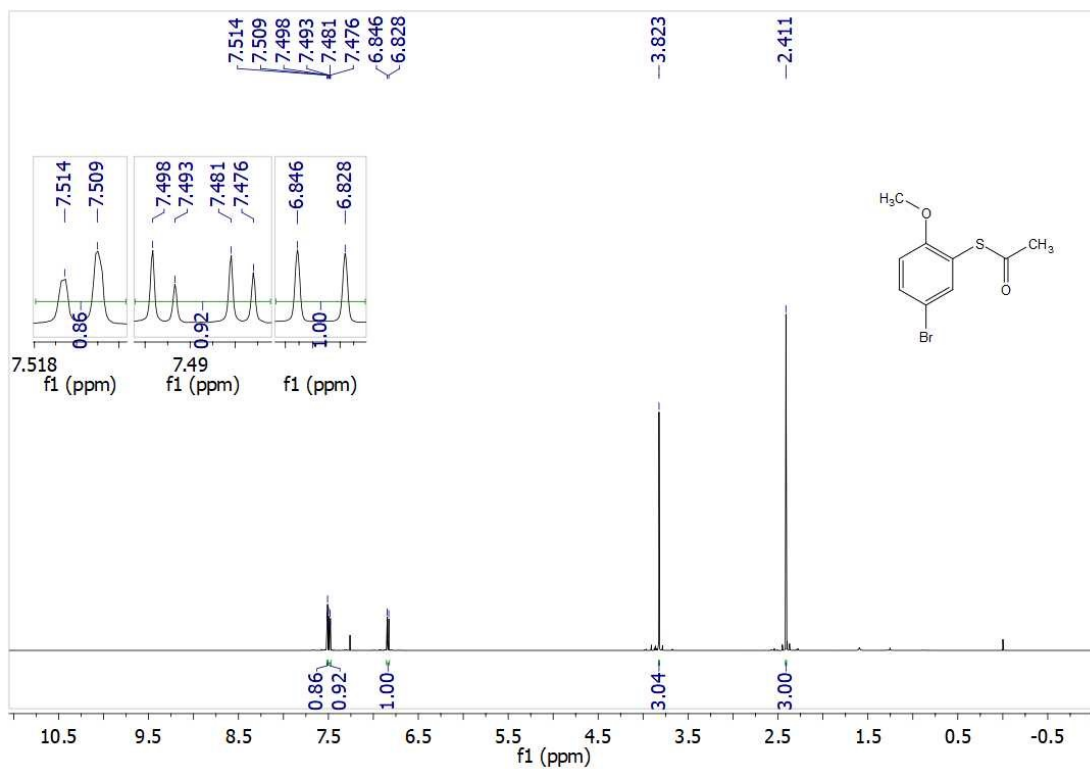

$^1\text{H NMR}$  (500 MHz,  $\text{CDCl}_3$ ) of compound 14.

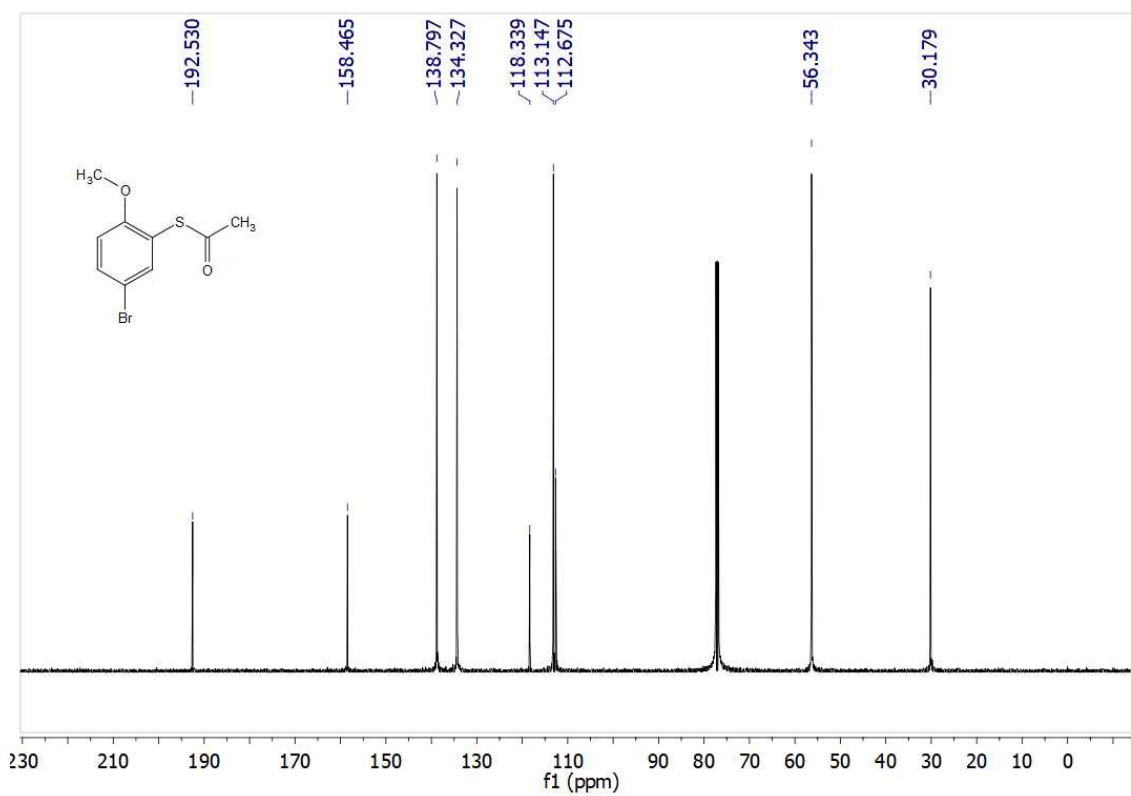

$^{13}\text{C NMR}$  (126 MHz,  $\text{CDCl}_3$ ) of compound 14.

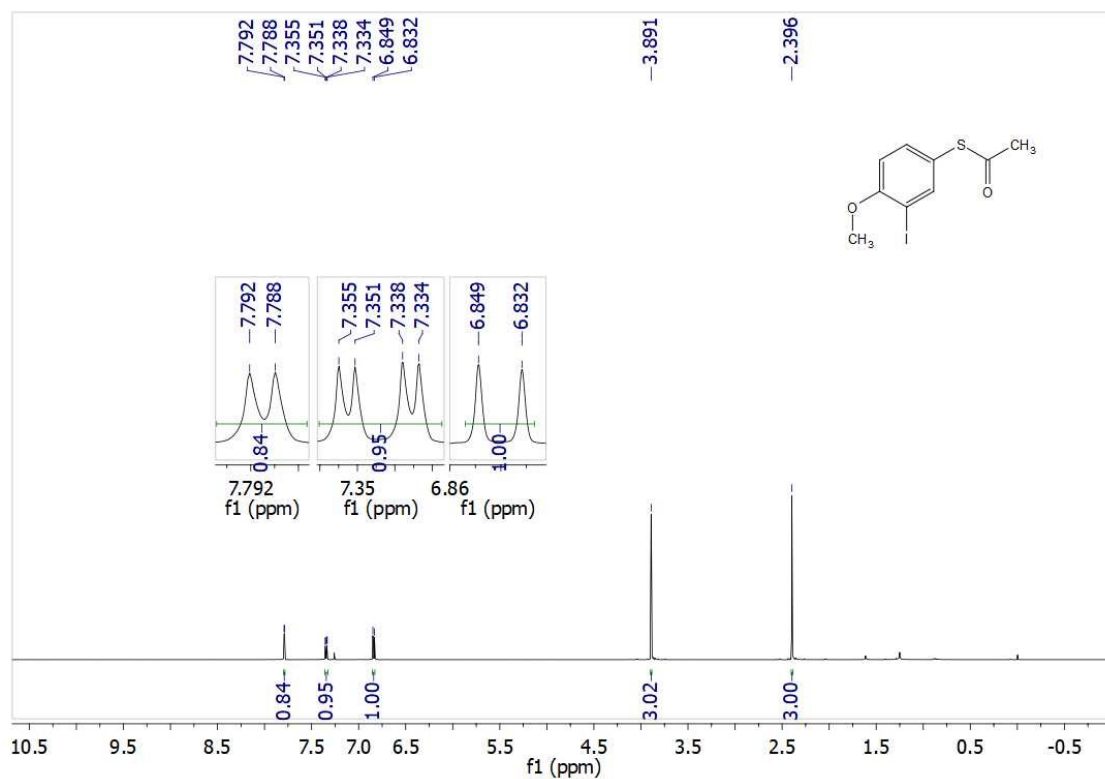

$^1\text{H}$  NMR (500 MHz,  $\text{CDCl}_3$ ) of compound **15**.

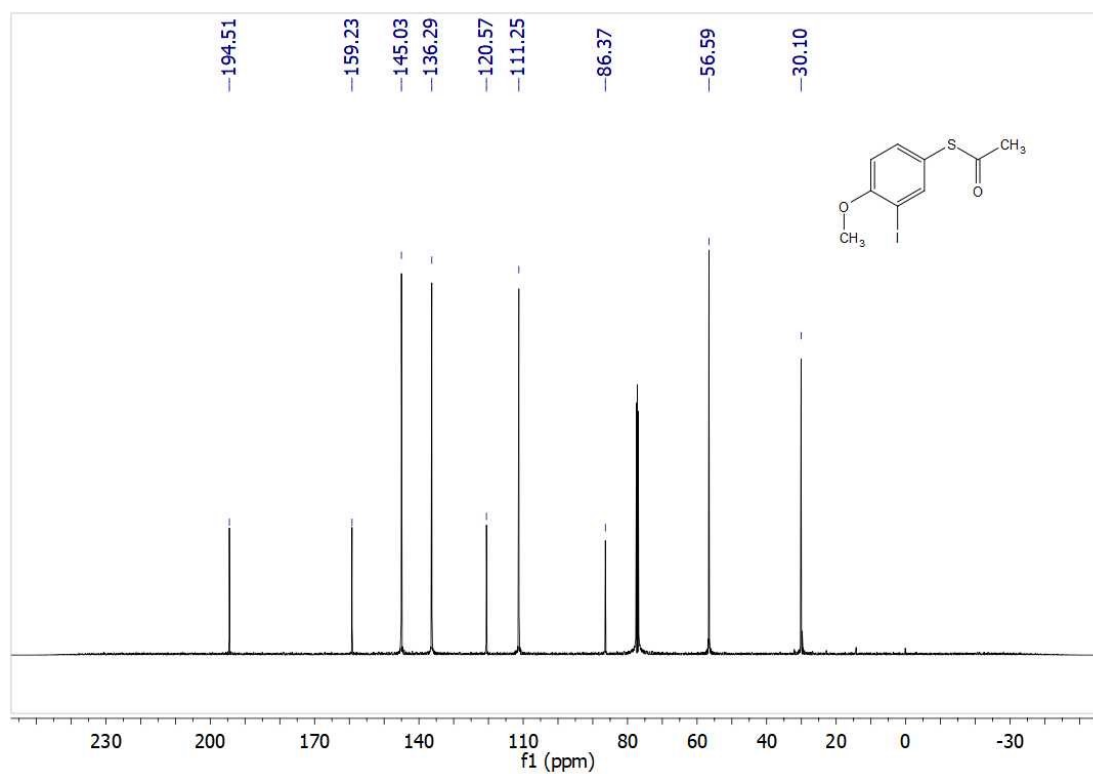

$^{13}\text{C}$  NMR (126 MHz,  $\text{CDCl}_3$ ) of compound **15**.

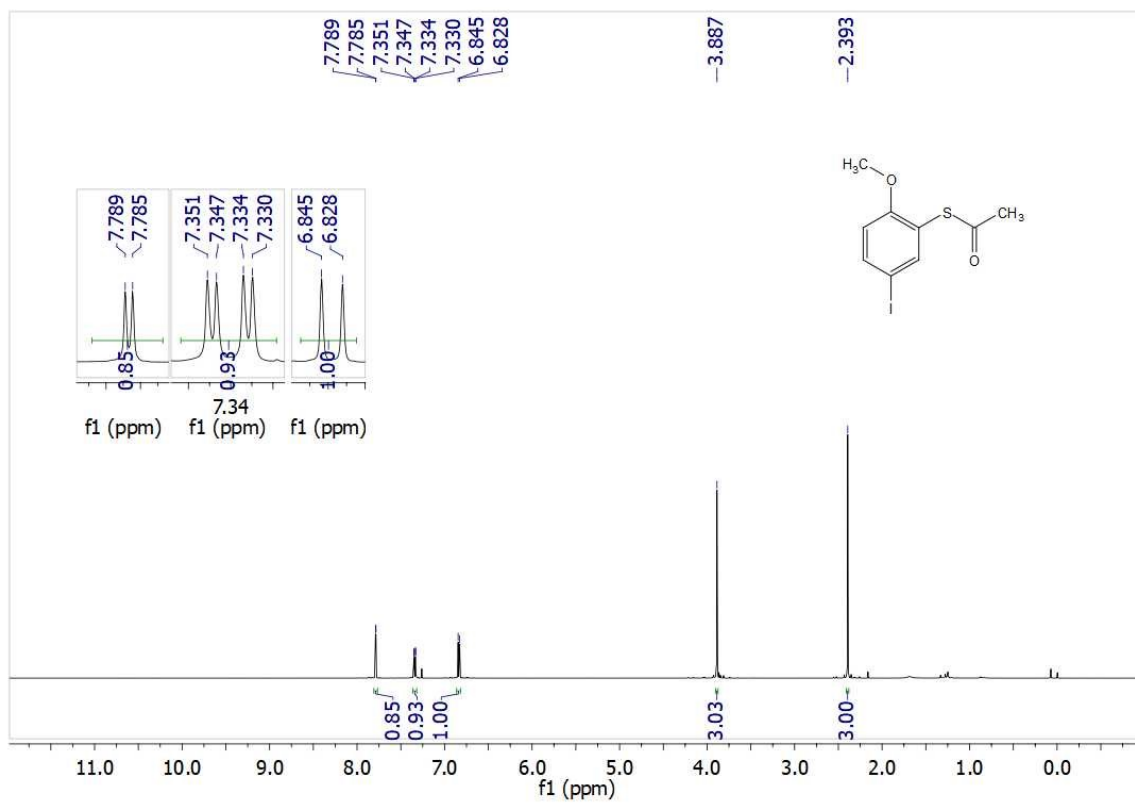

$^1\text{H}$  NMR (500 MHz,  $\text{CDCl}_3$ ) of compound 16.

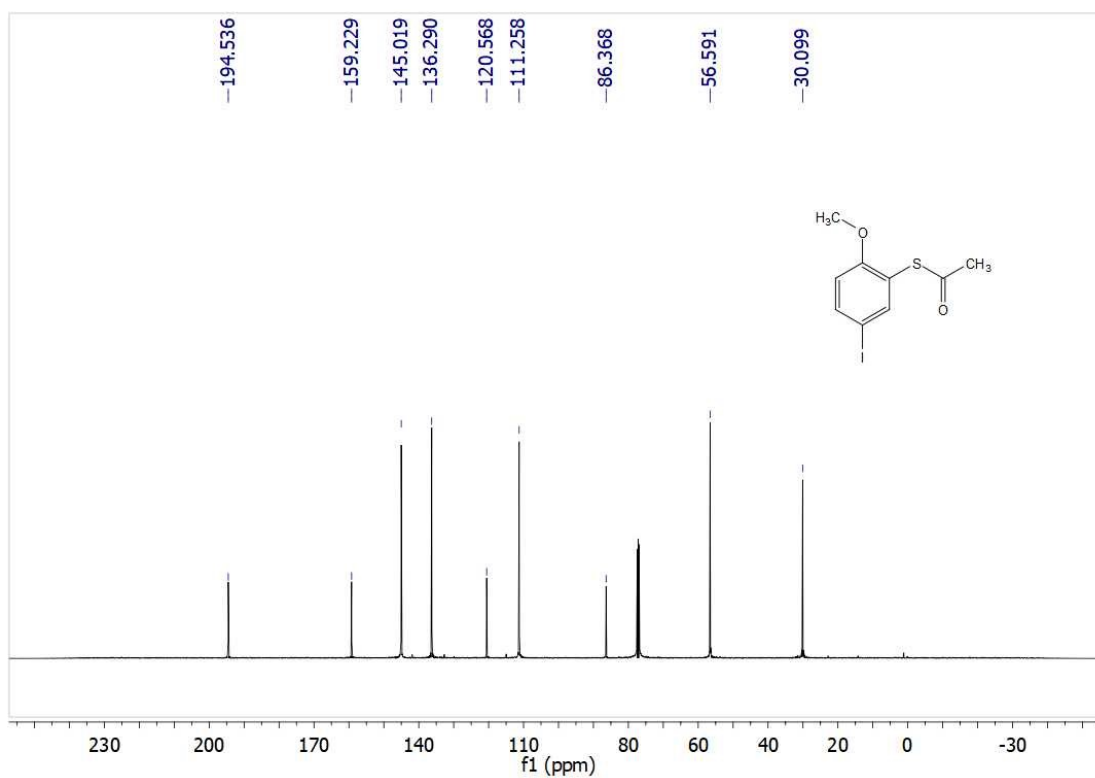

$^{13}\text{C}$  NMR (126 MHz,  $\text{CDCl}_3$ ) of compound 16.



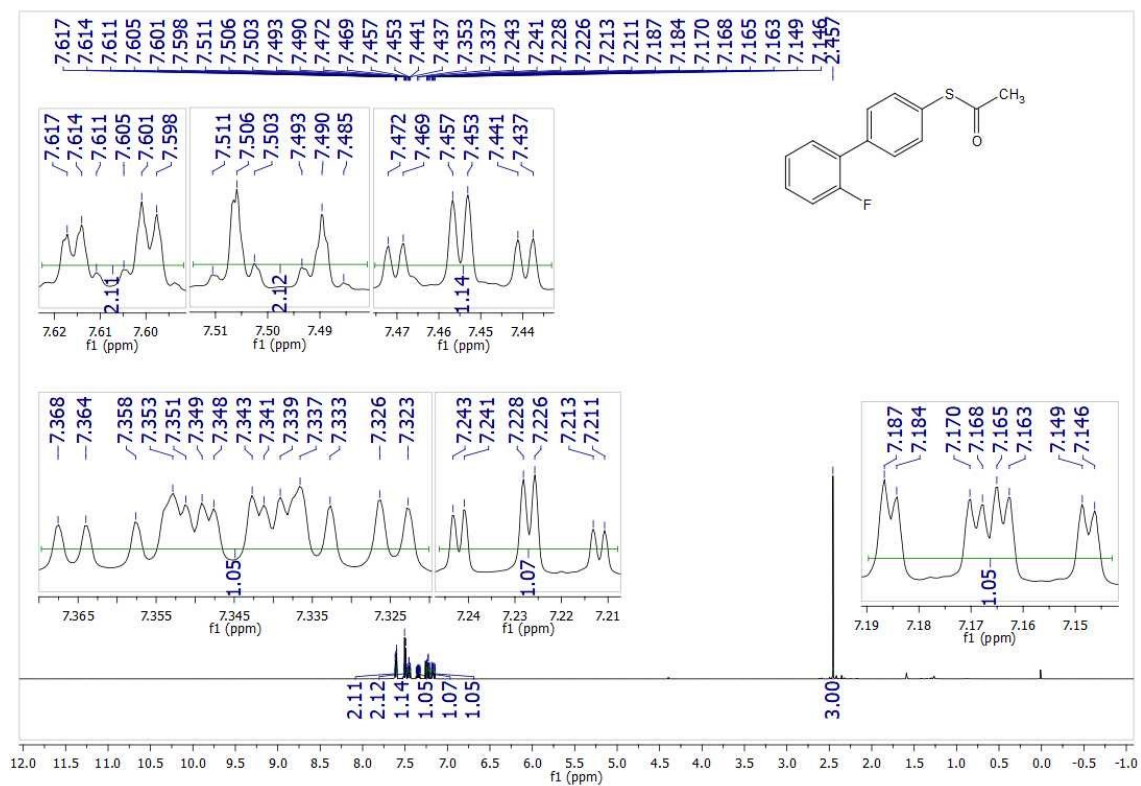

<sup>1</sup>H NMR (500 MHz, CDCl<sub>3</sub>) of compound 17.

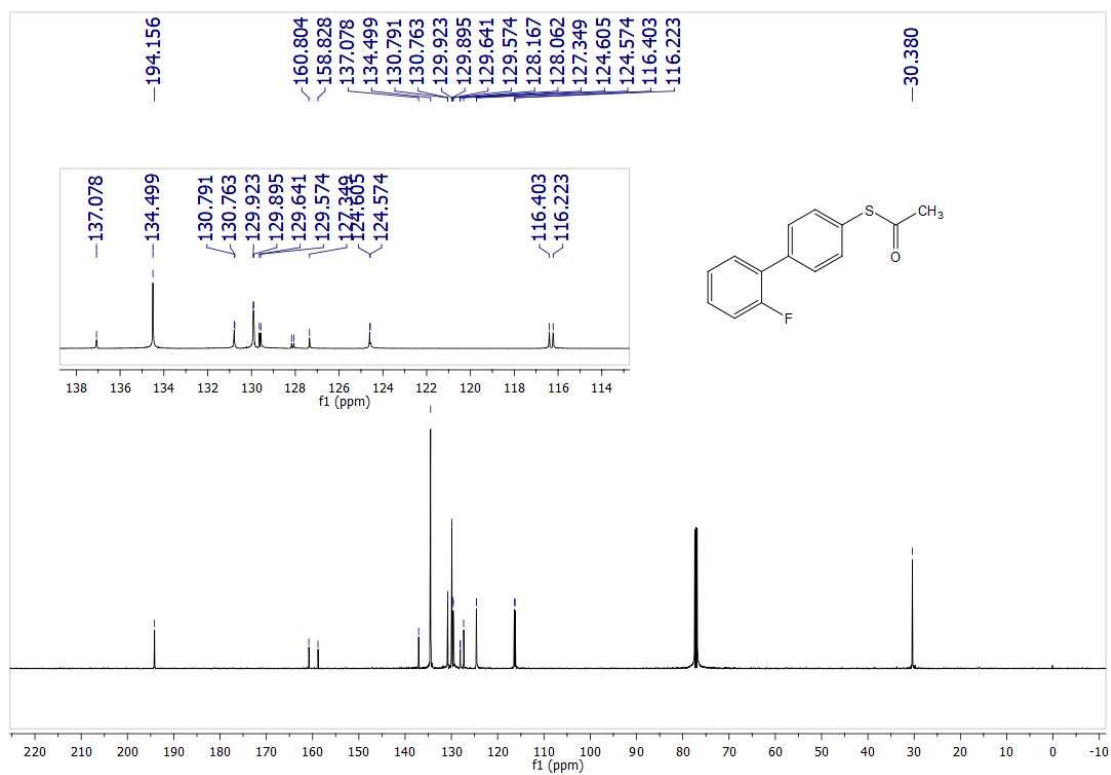

<sup>13</sup>C NMR (126 MHz, CDCl<sub>3</sub>) of compound 17.

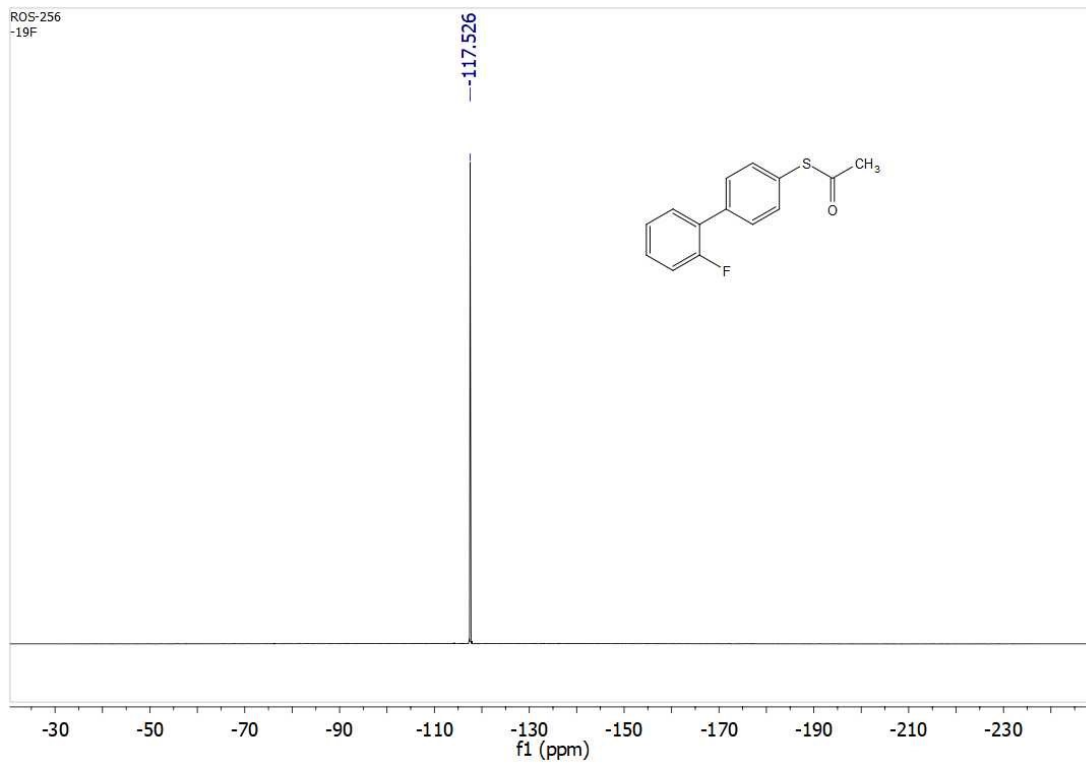

$^{19}\text{F}$  NMR (472 MHz,  $\text{CDCl}_3$ ) of compound 17.

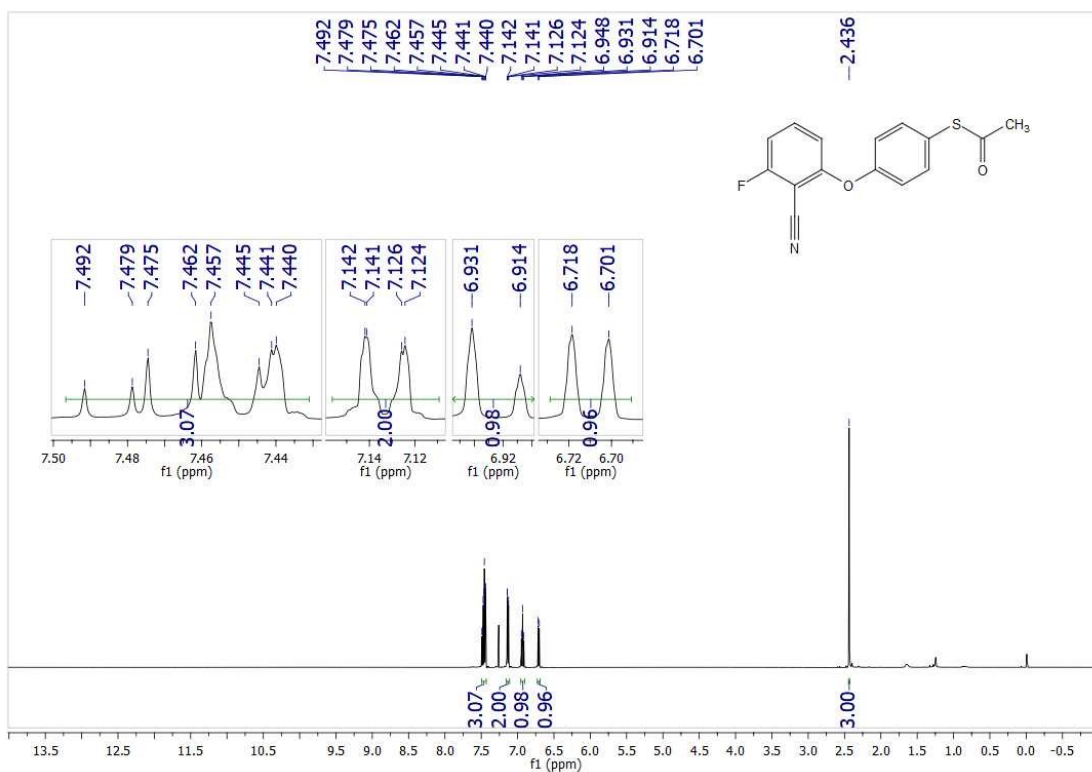

$^1\text{H}$  NMR (500 MHz,  $\text{CDCl}_3$ ) of compound 18.

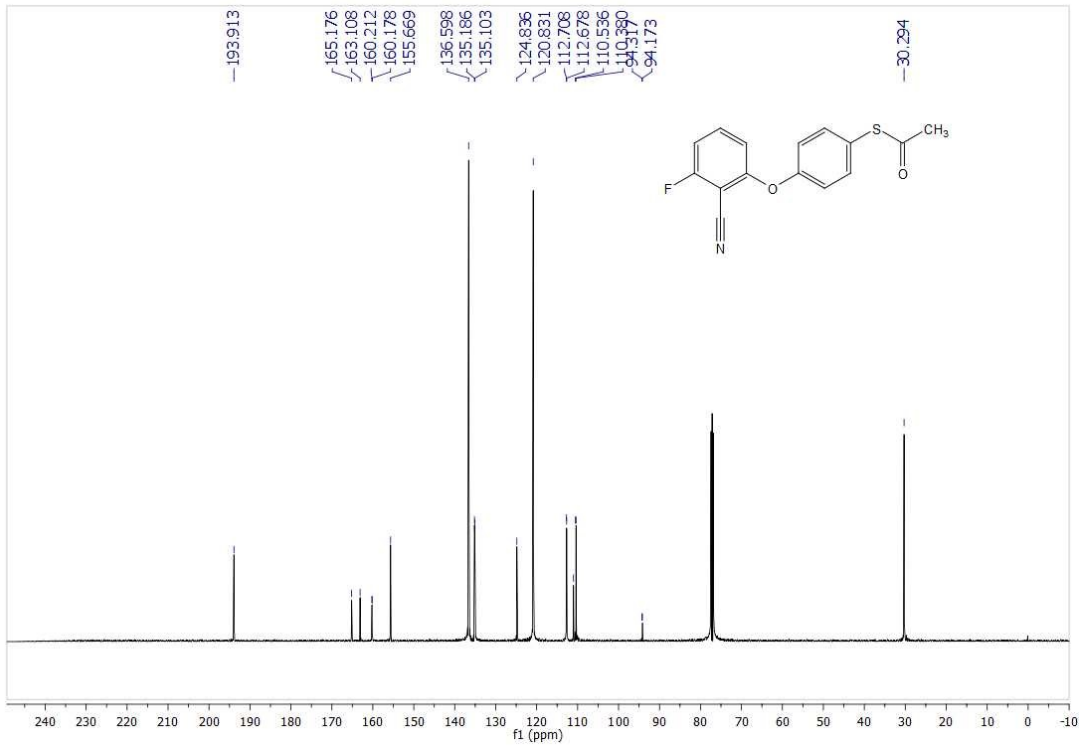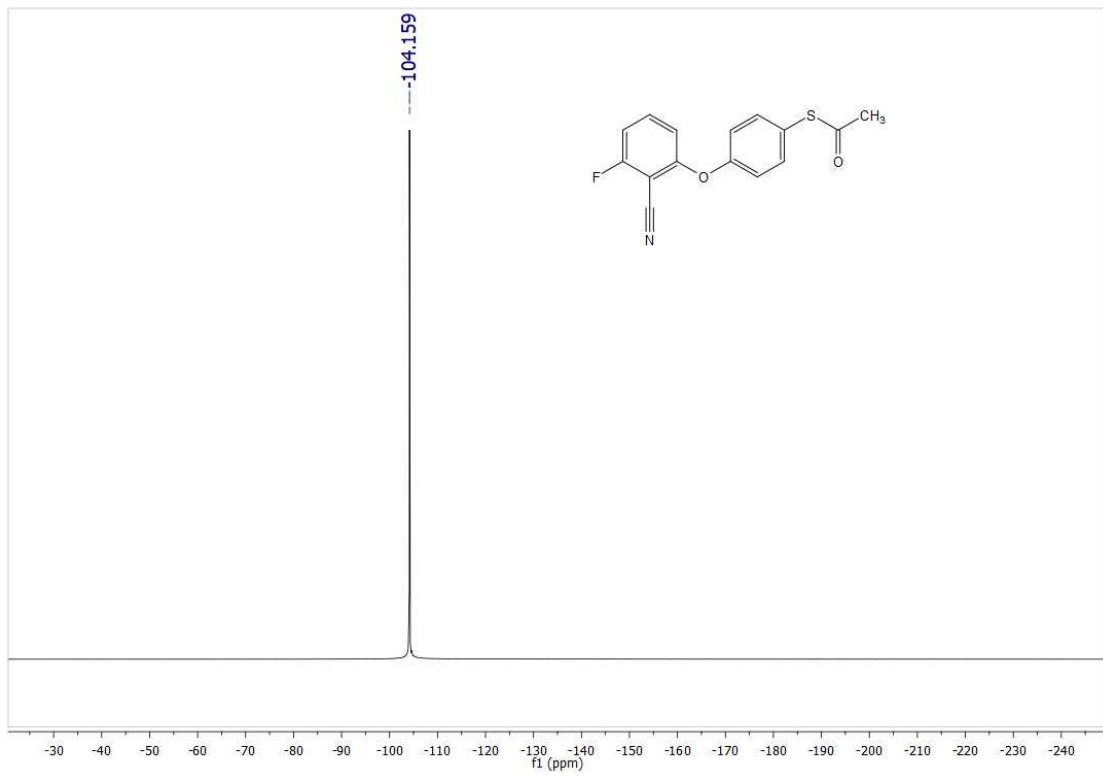

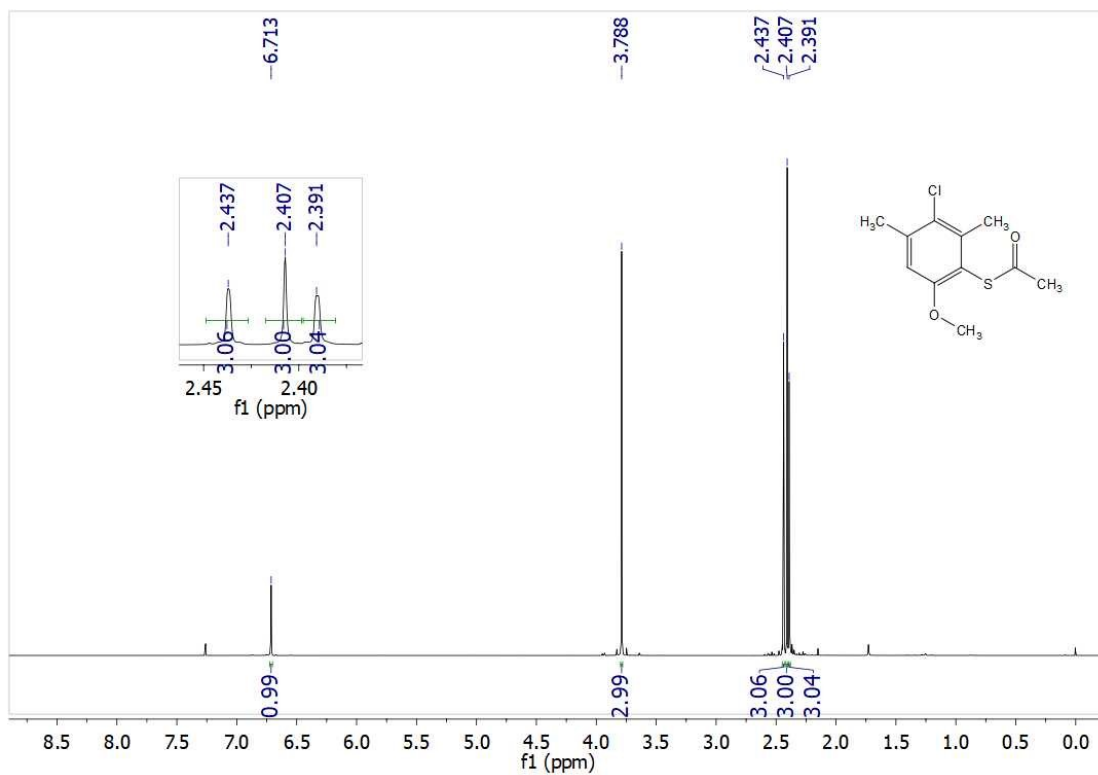

<sup>1</sup>H NMR (500 MHz, CDCl<sub>3</sub>) of compound 19.

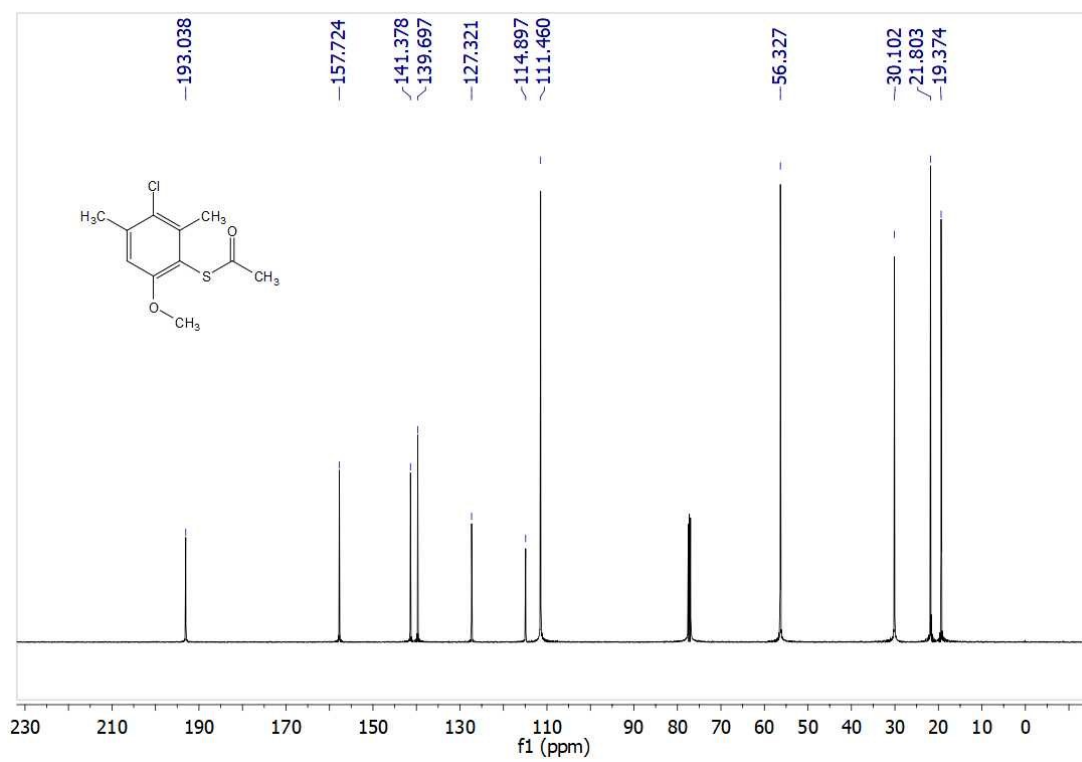

<sup>13</sup>C NMR (126 MHz, CDCl<sub>3</sub>) of compound 19.

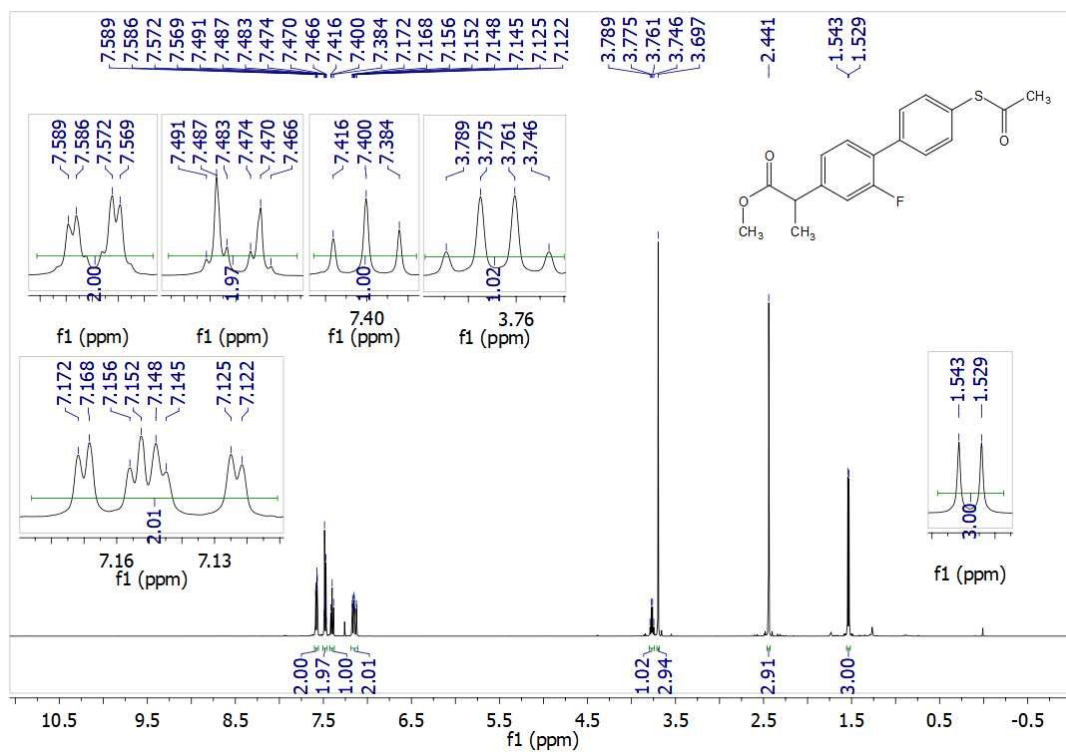

<sup>1</sup>H NMR (500 MHz, CDCl<sub>3</sub>) of compound 20.

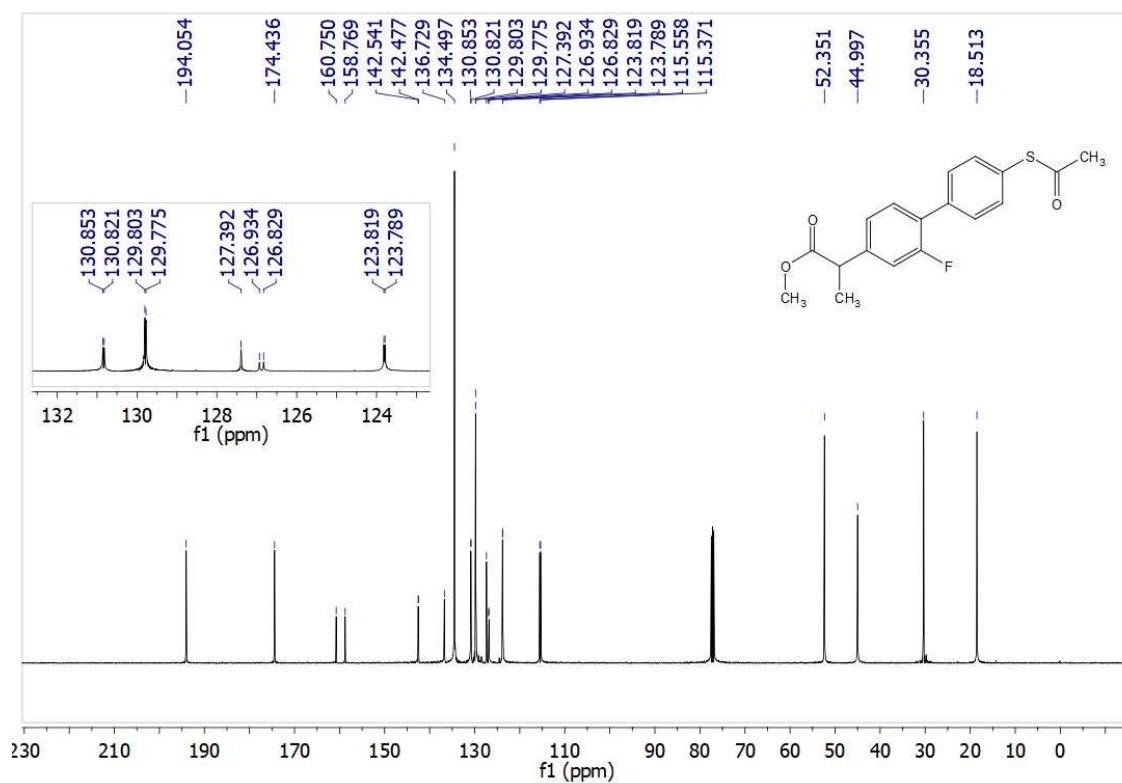

<sup>13</sup>C NMR (126 MHz, CDCl<sub>3</sub>) of compound 20.

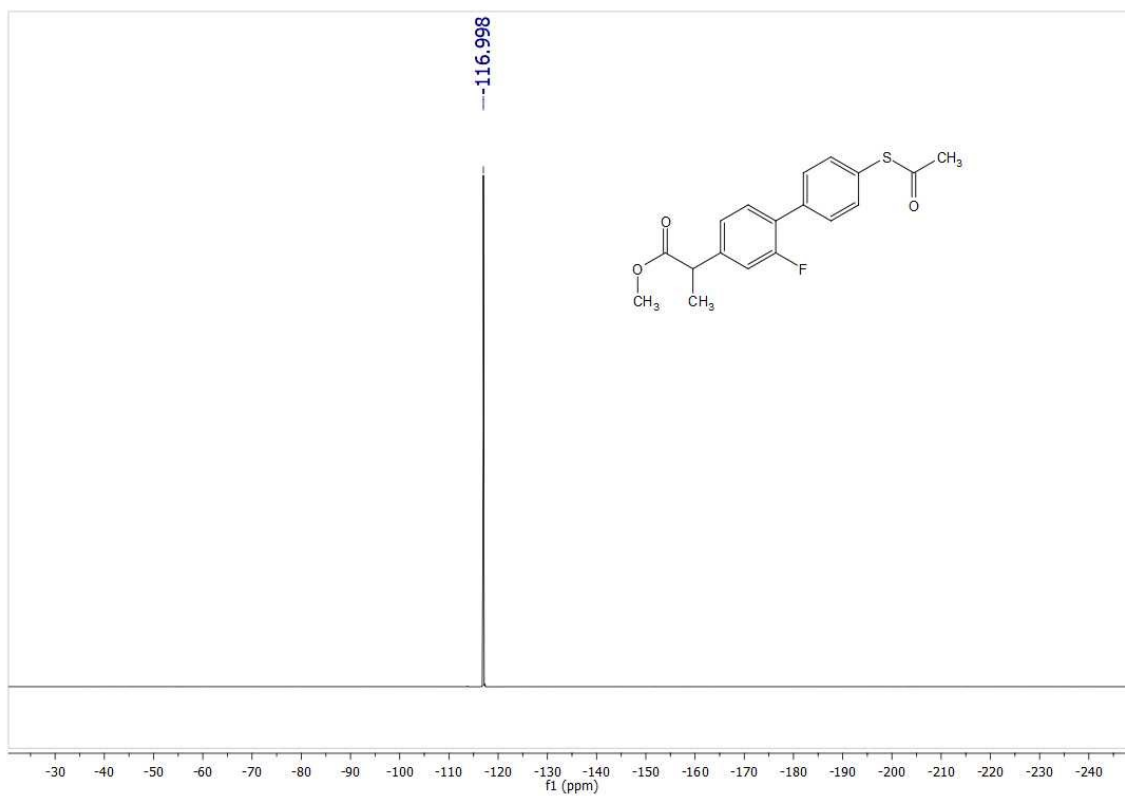

$^{19}\text{F}$  NMR (472 MHz,  $\text{CDCl}_3$ ) of compound **20**.

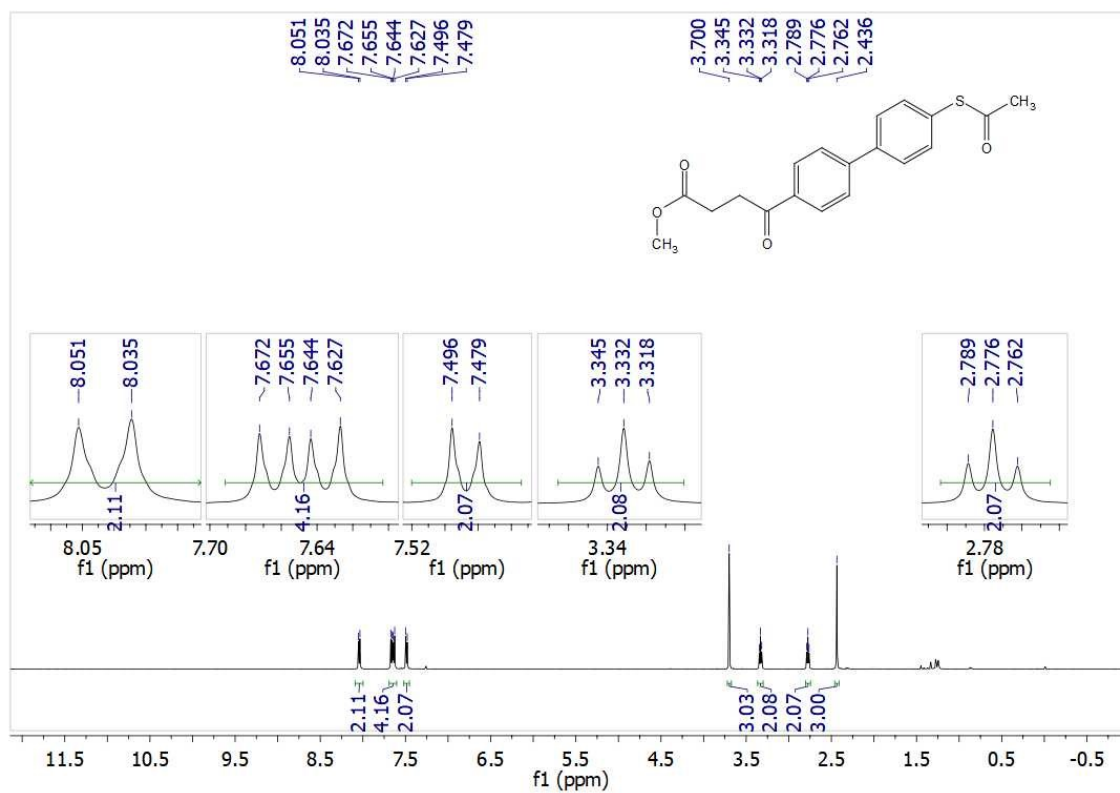

$^1\text{H}$  NMR (500 MHz,  $\text{CDCl}_3$ ) of compound **21**.

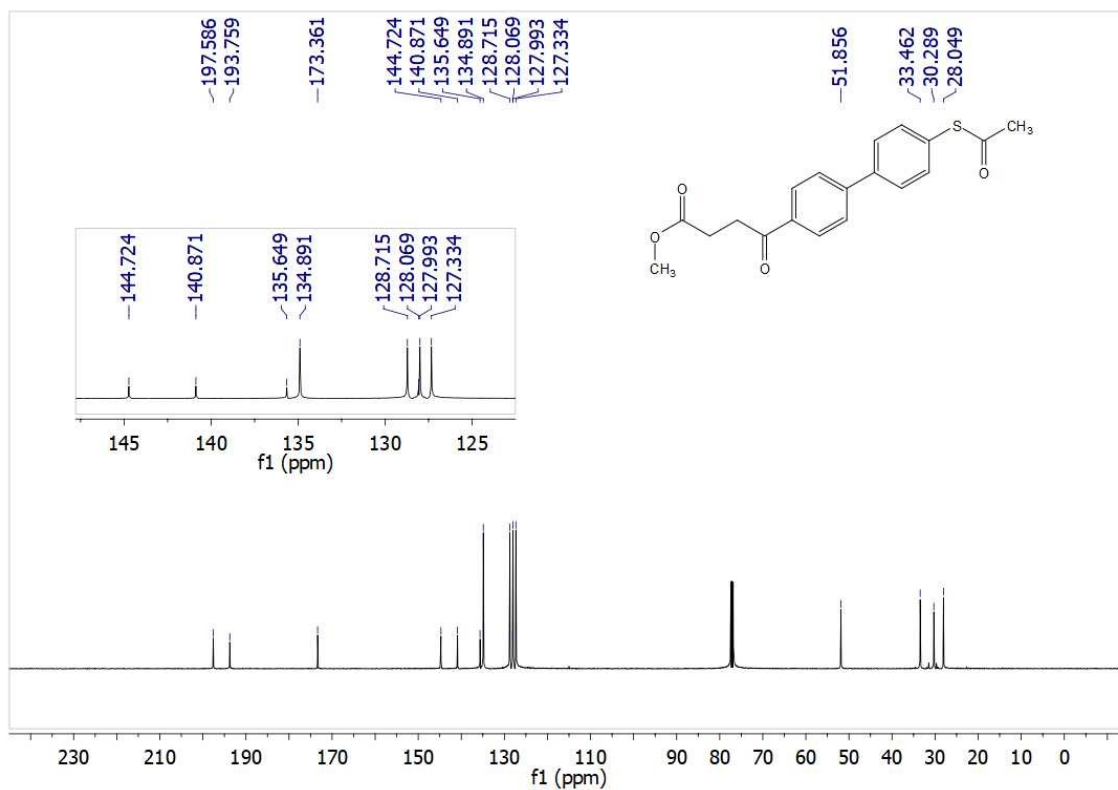

<sup>13</sup>C NMR (126 MHz, CDCl<sub>3</sub>) of compound 21.

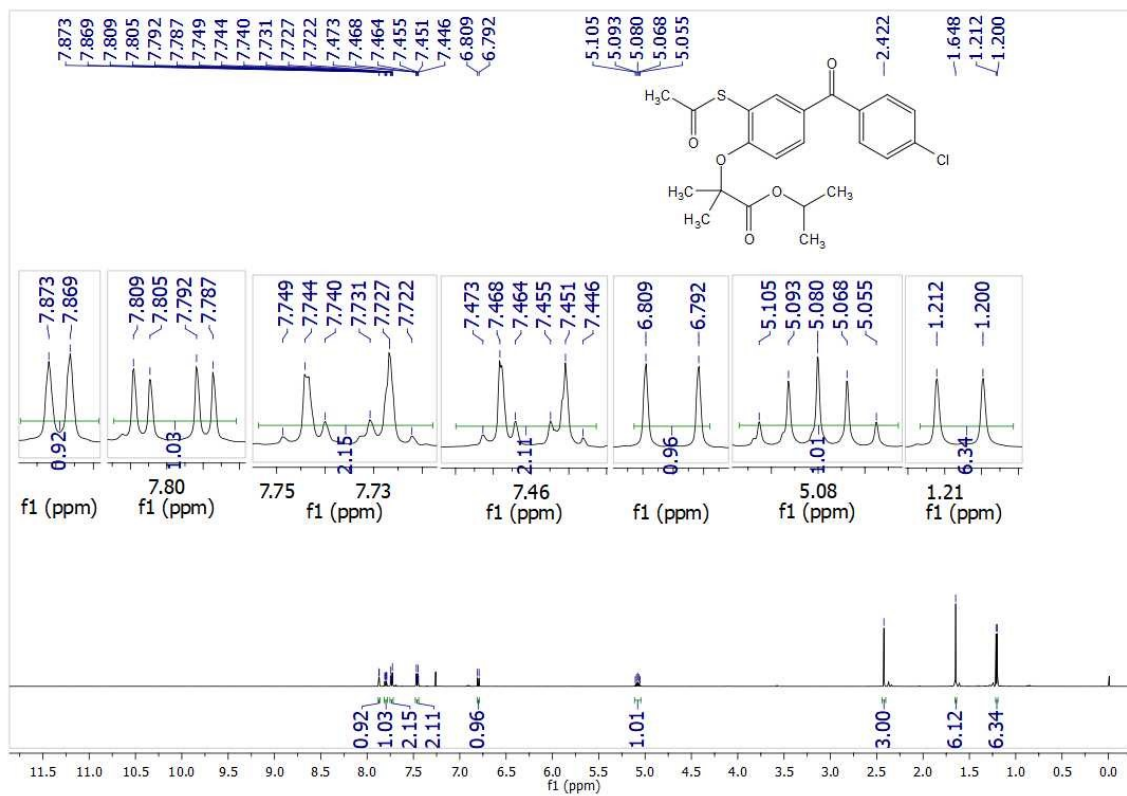

<sup>1</sup>H NMR (500 MHz, CDCl<sub>3</sub>) of compound 22.

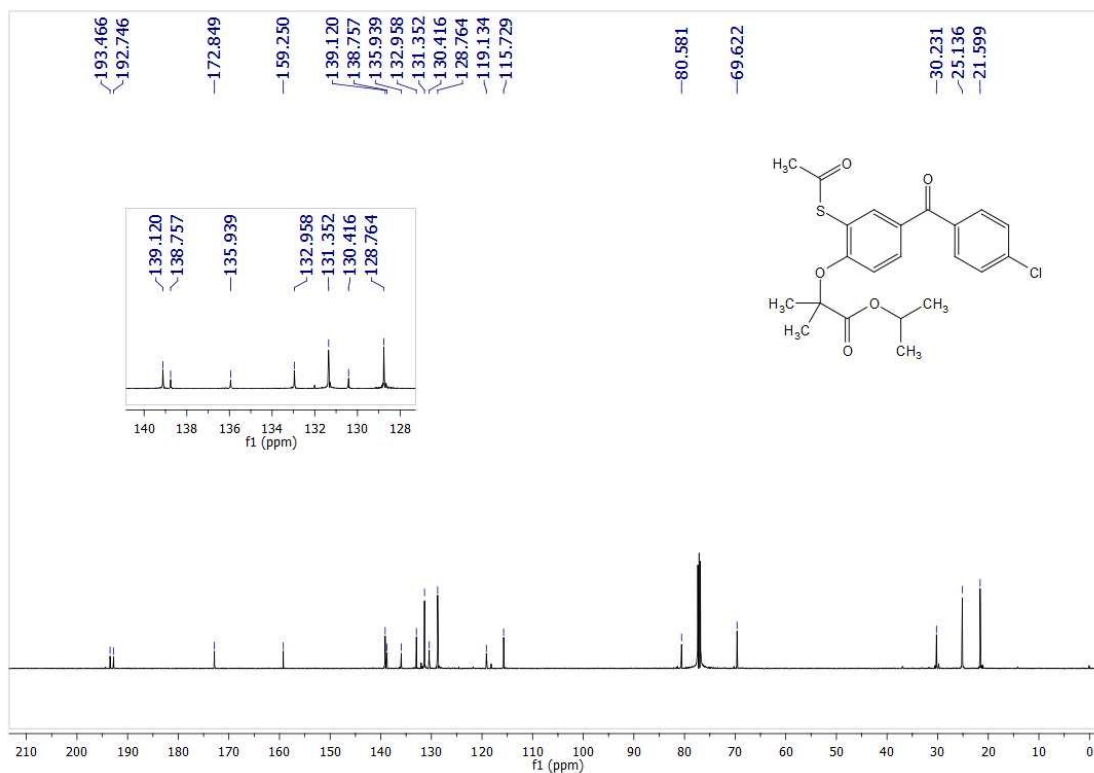

<sup>13</sup>C NMR (126 MHz, CDCl<sub>3</sub>) of compound 22.

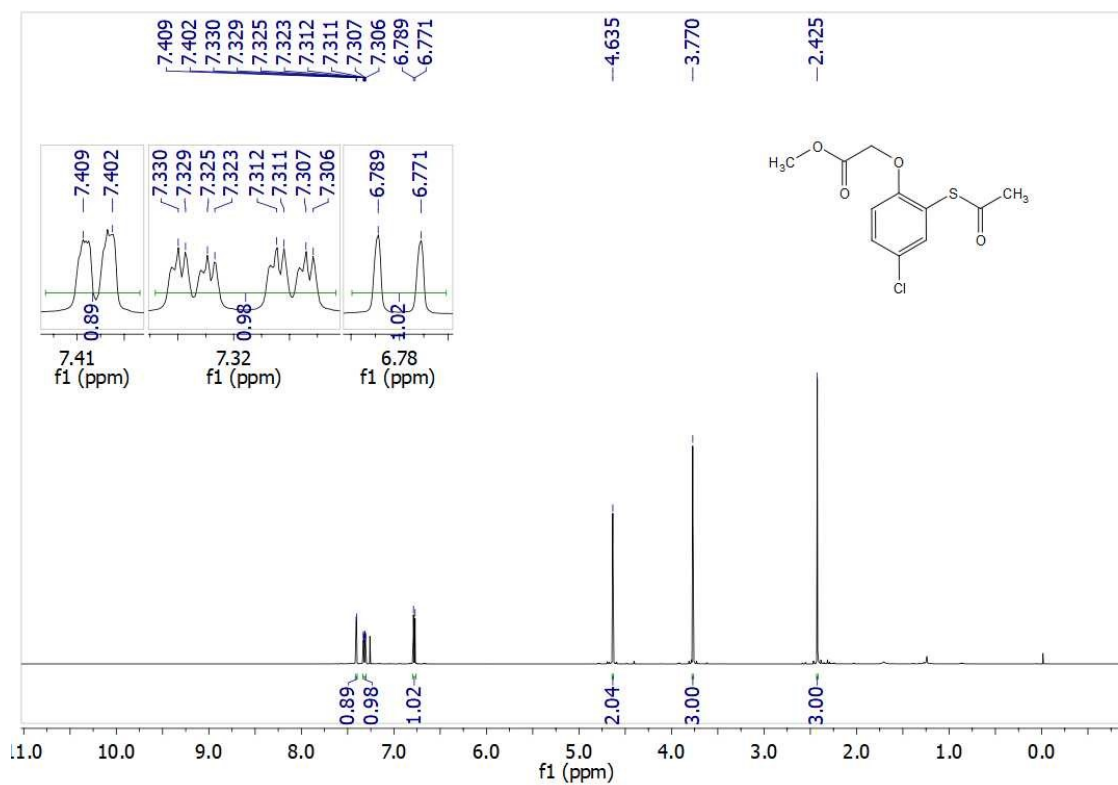

<sup>1</sup>H NMR (500 MHz, CDCl<sub>3</sub>) of compound 23.



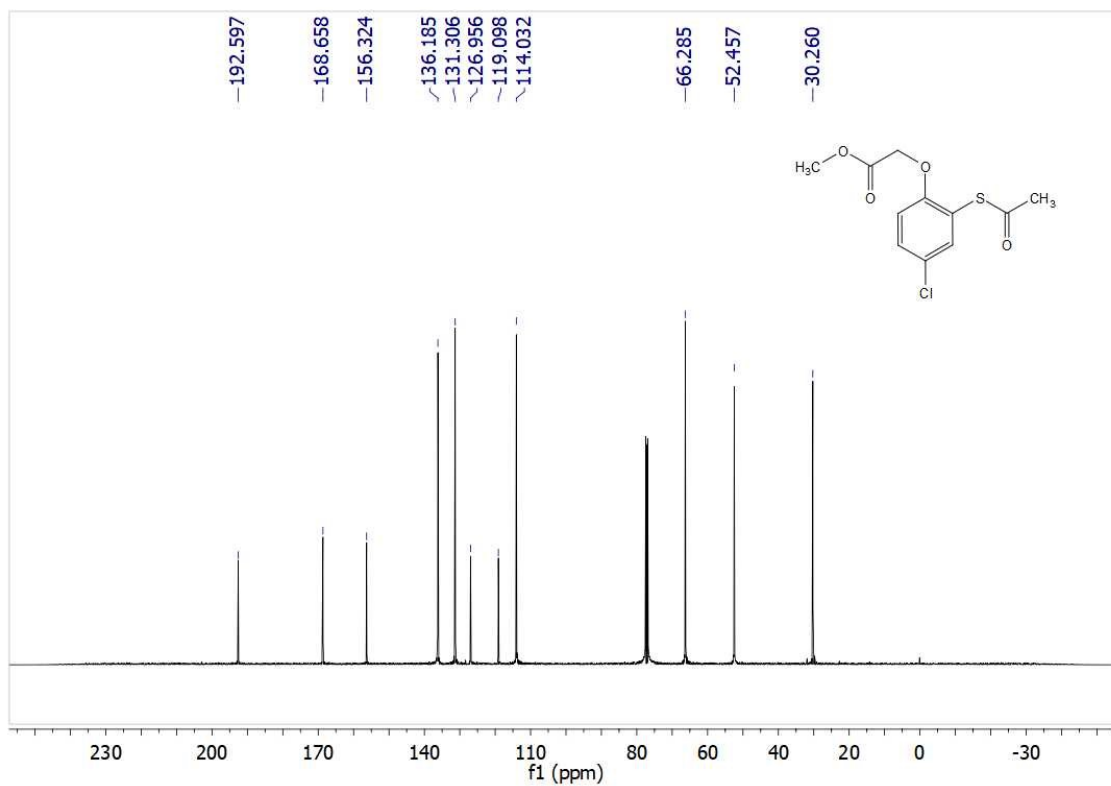

<sup>13</sup>C NMR (126 MHz, CDCl<sub>3</sub>) of compound 23.

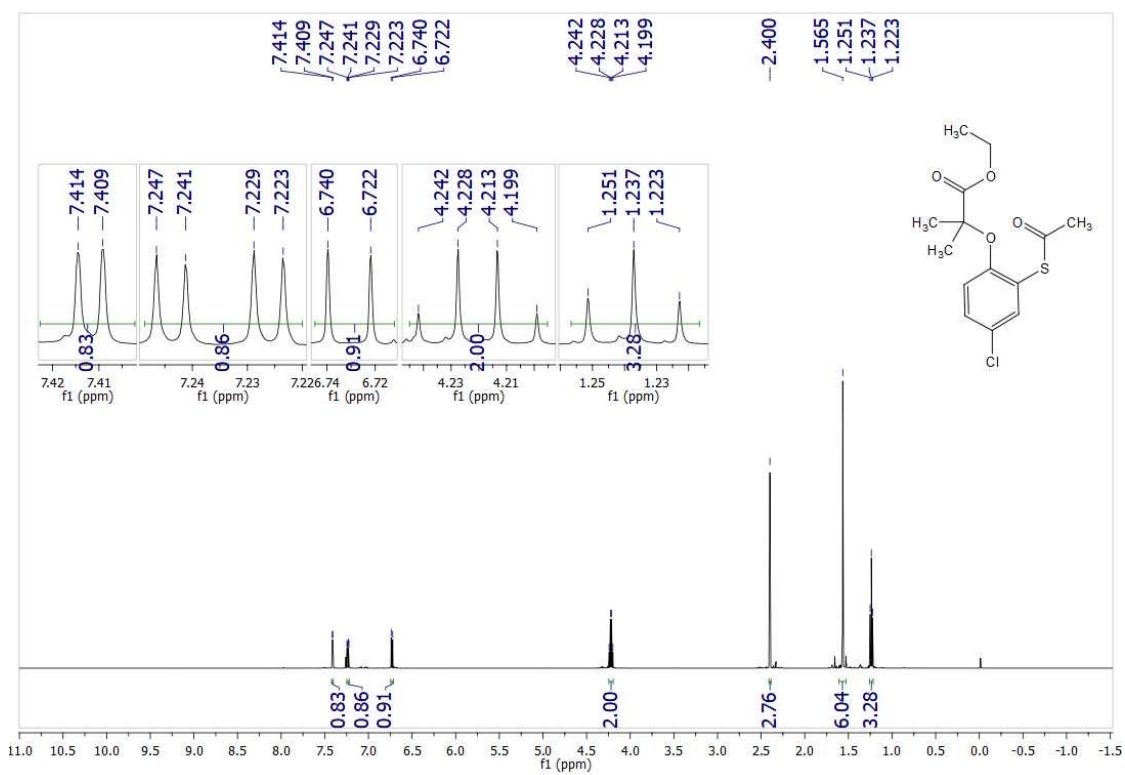

<sup>1</sup>H NMR (500 MHz, CDCl<sub>3</sub>) of compound 24.

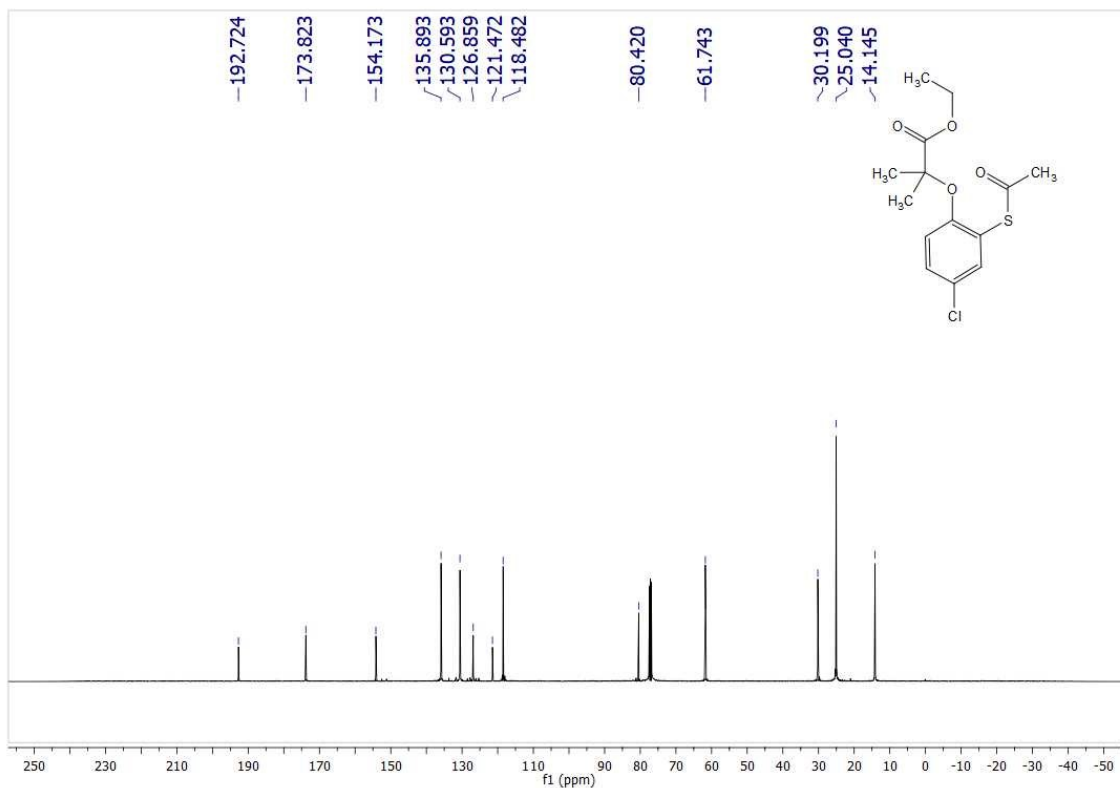

<sup>13</sup>C NMR (126 MHz, CDCl<sub>3</sub>) of compound 24.

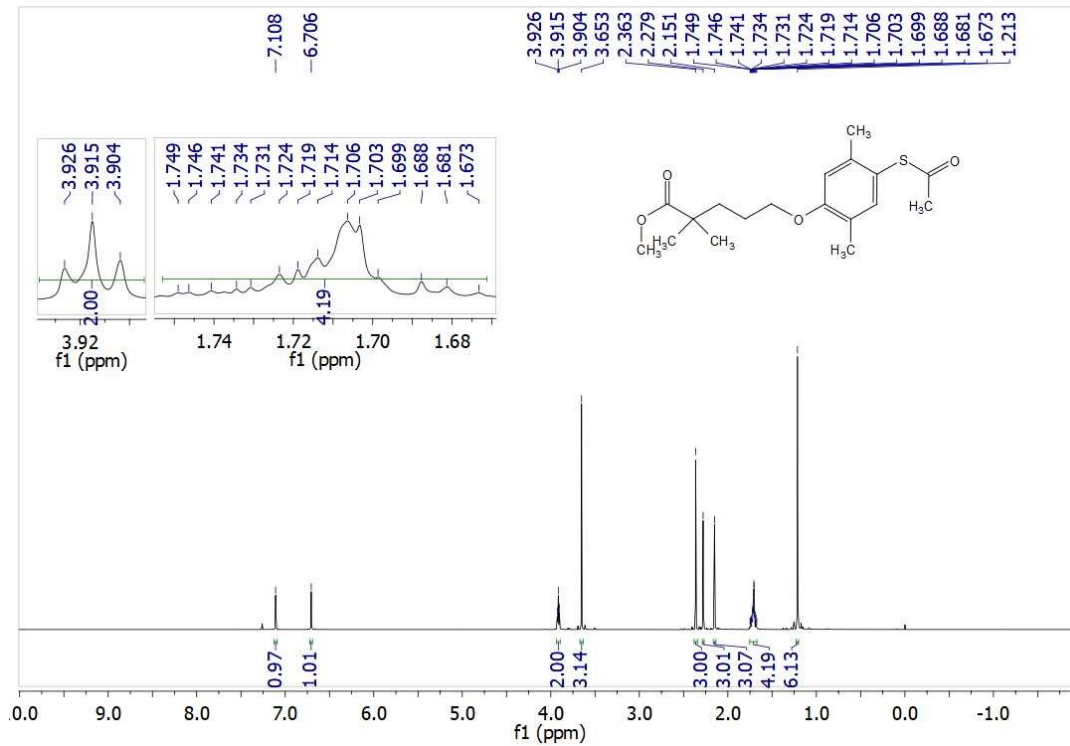

<sup>1</sup>H NMR (500 MHz, CDCl<sub>3</sub>) of compound 25.

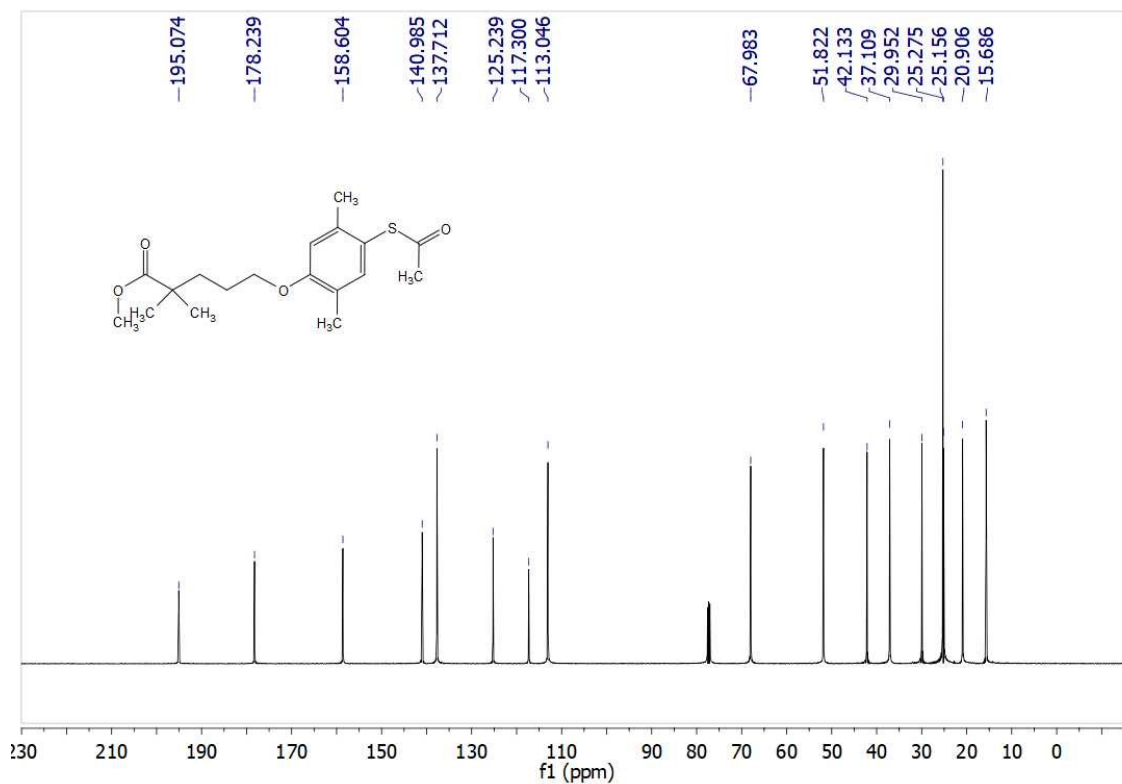

<sup>13</sup>C NMR (126 MHz, CDCl<sub>3</sub>) of compound 25.

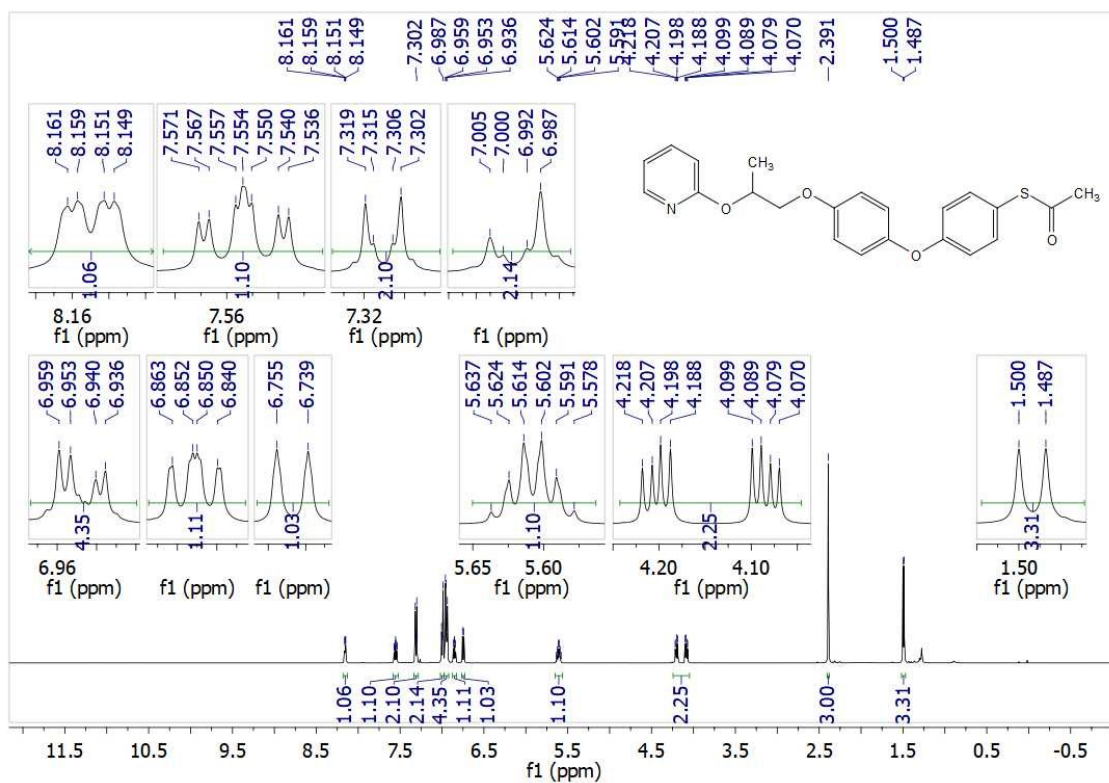

<sup>1</sup>H NMR (500 MHz, CDCl<sub>3</sub>) of compound 26.

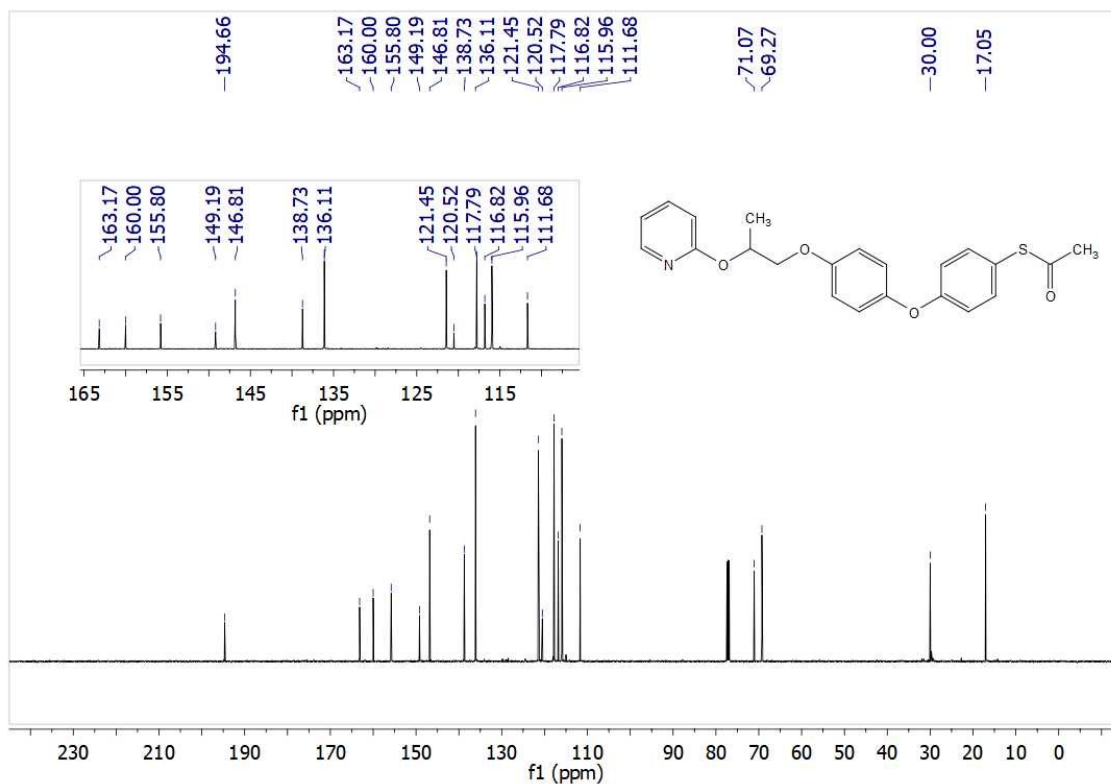

<sup>13</sup>C NMR (126 MHz, CDCl<sub>3</sub>) of compound 26.

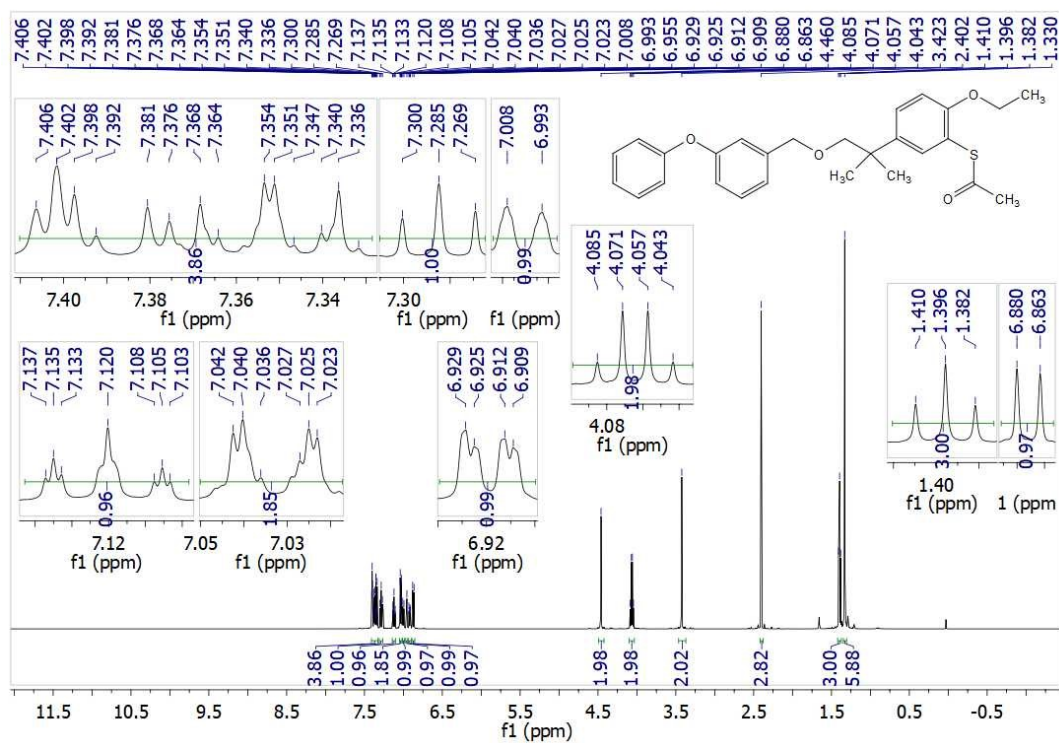

<sup>1</sup>H NMR (500 MHz, CDCl<sub>3</sub>) of compound 27.

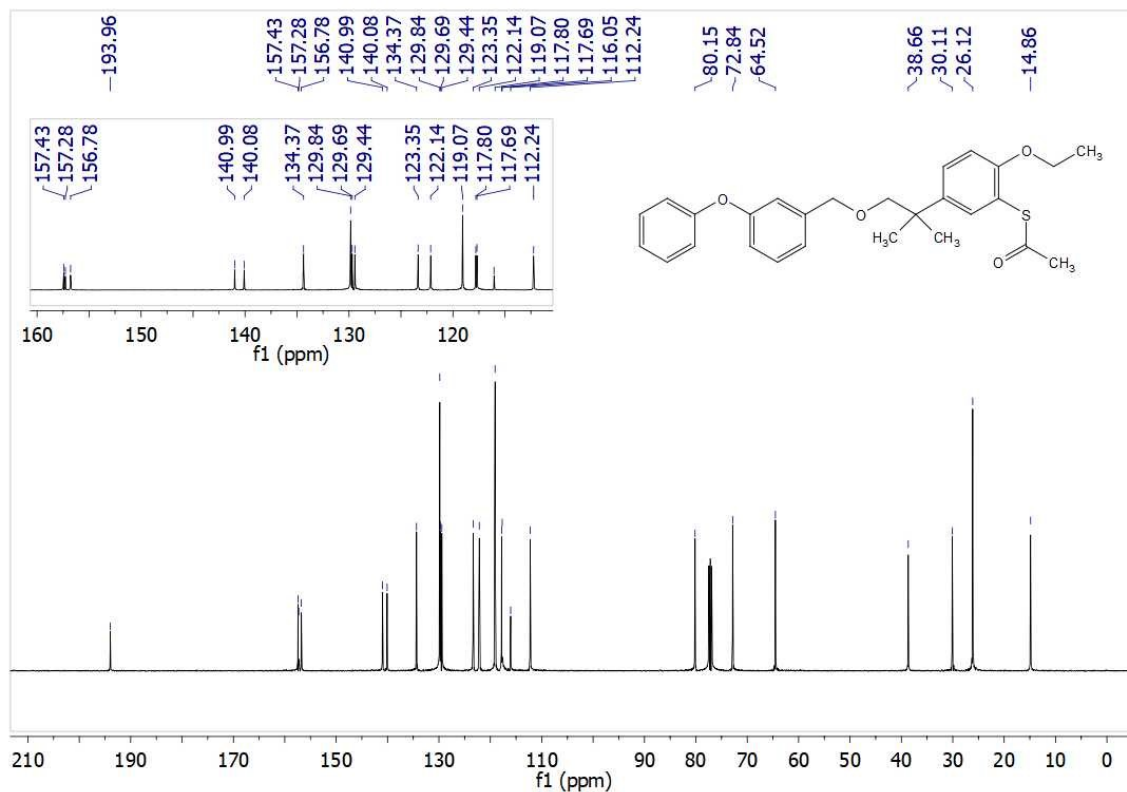

<sup>13</sup>C NMR (126 MHz, CDCl<sub>3</sub>) of compound 27.

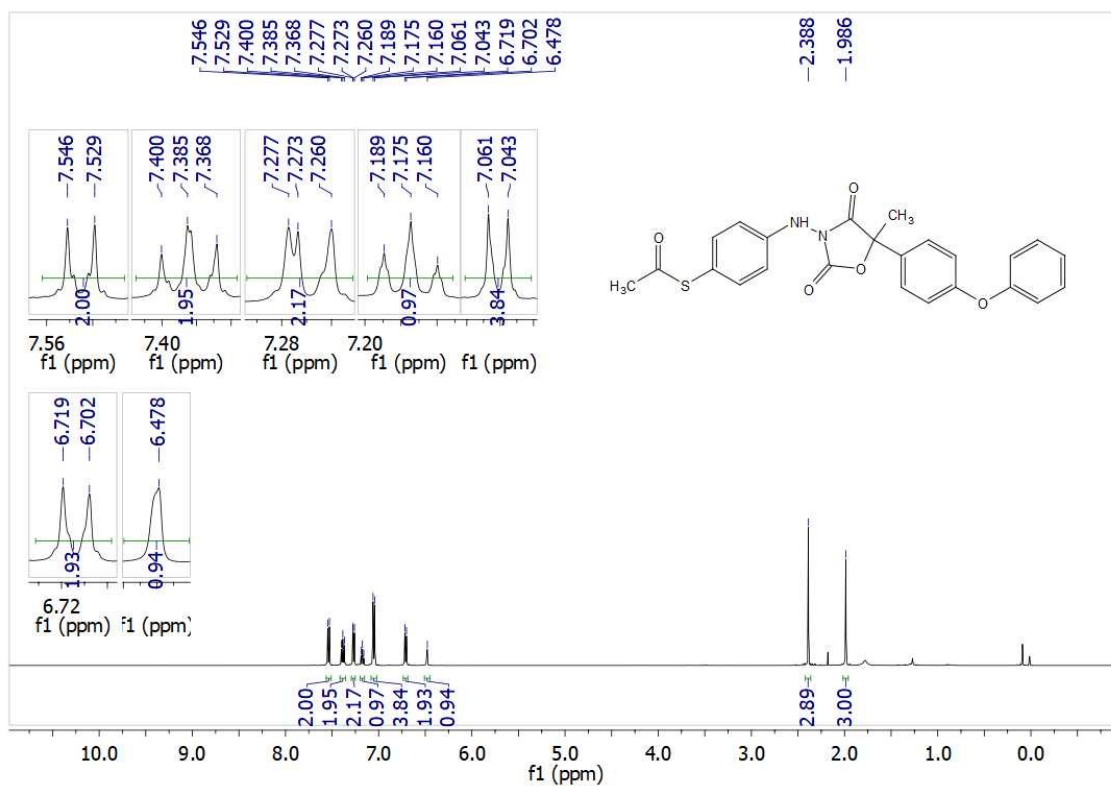

<sup>1</sup>H NMR (500 MHz, CDCl<sub>3</sub>) of compound 28.

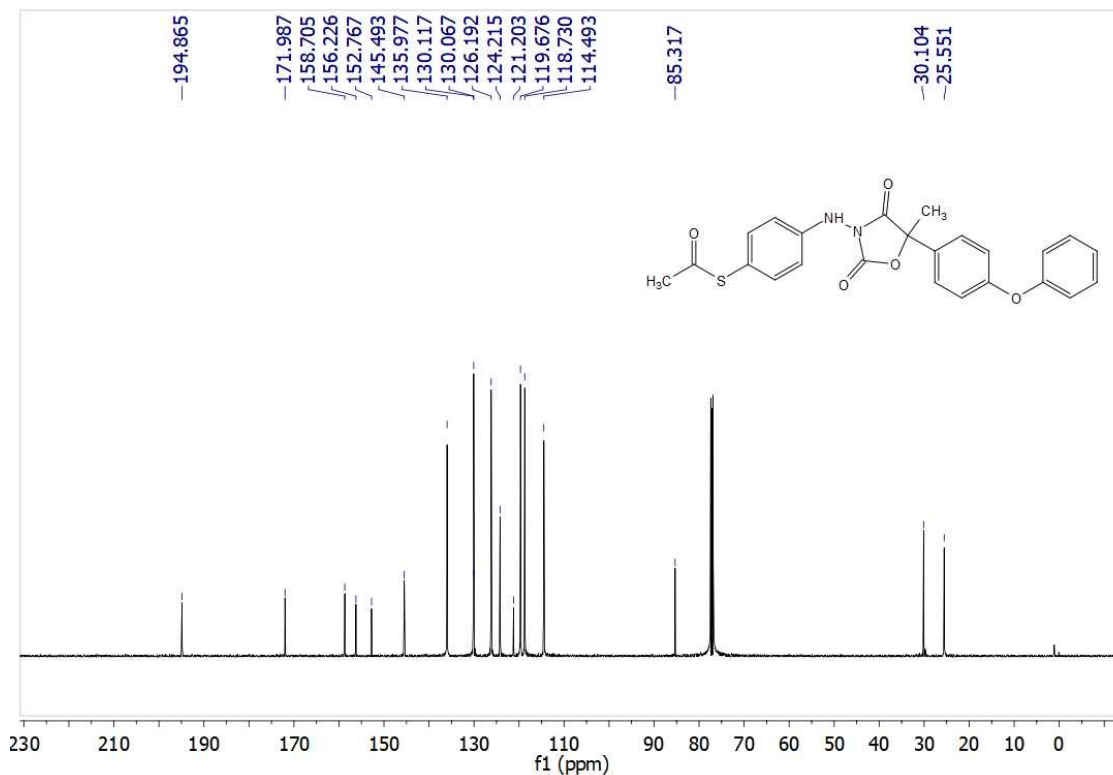

$^{13}\text{C}$  NMR (126 MHz,  $\text{CDCl}_3$ ) of compound 28.

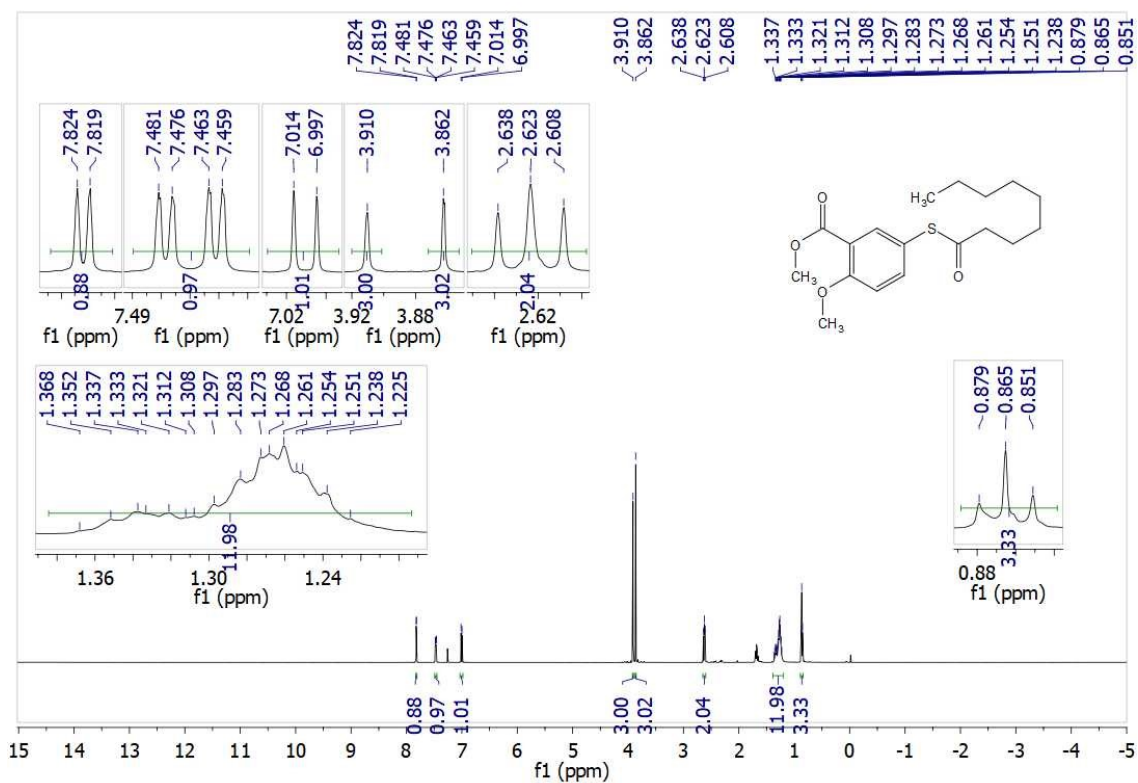

$^1\text{H}$  NMR (500 MHz,  $\text{CDCl}_3$ ) of compound 29.

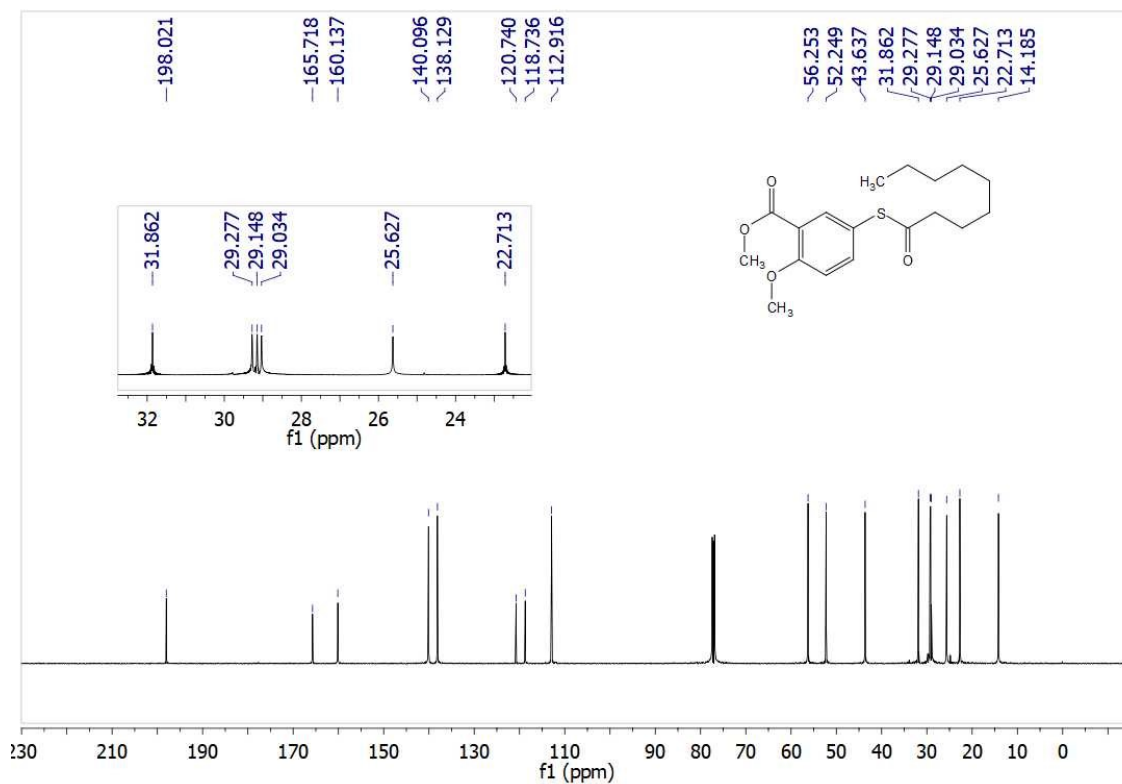

$^{13}\text{C}$  NMR (126 MHz,  $\text{CDCl}_3$ ) of compound 29.

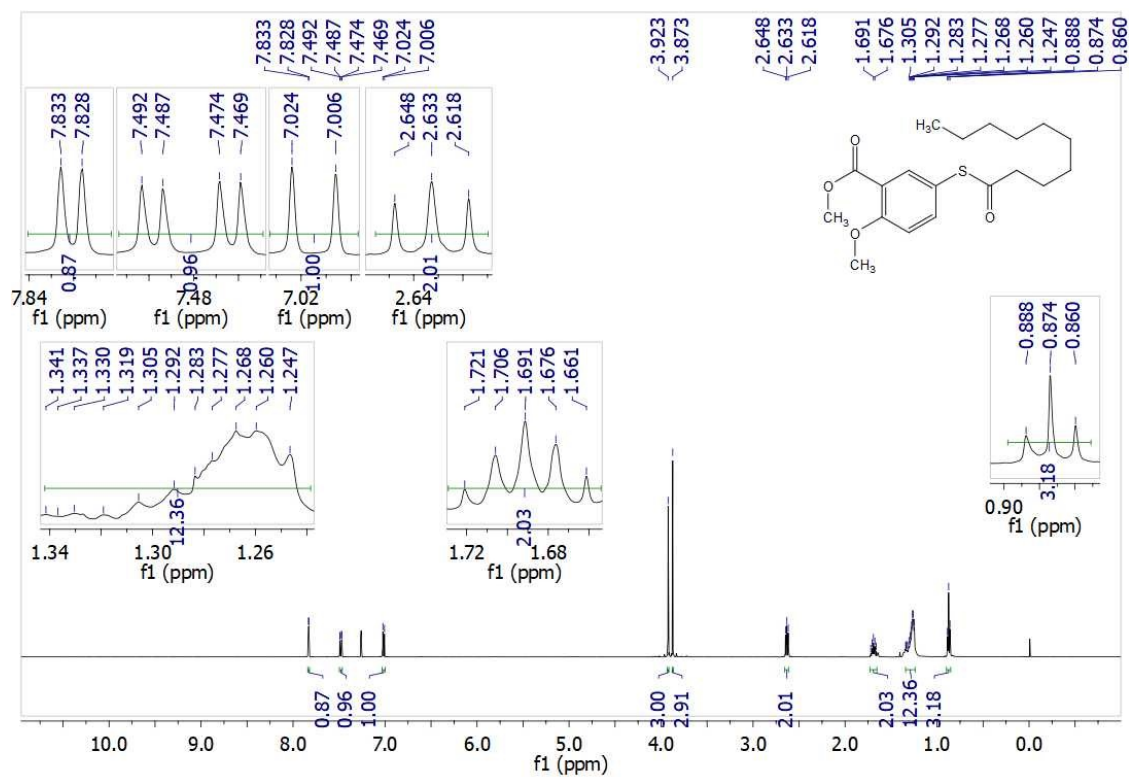

$^1\text{H}$  NMR (500 MHz,  $\text{CDCl}_3$ ) of compound 30.

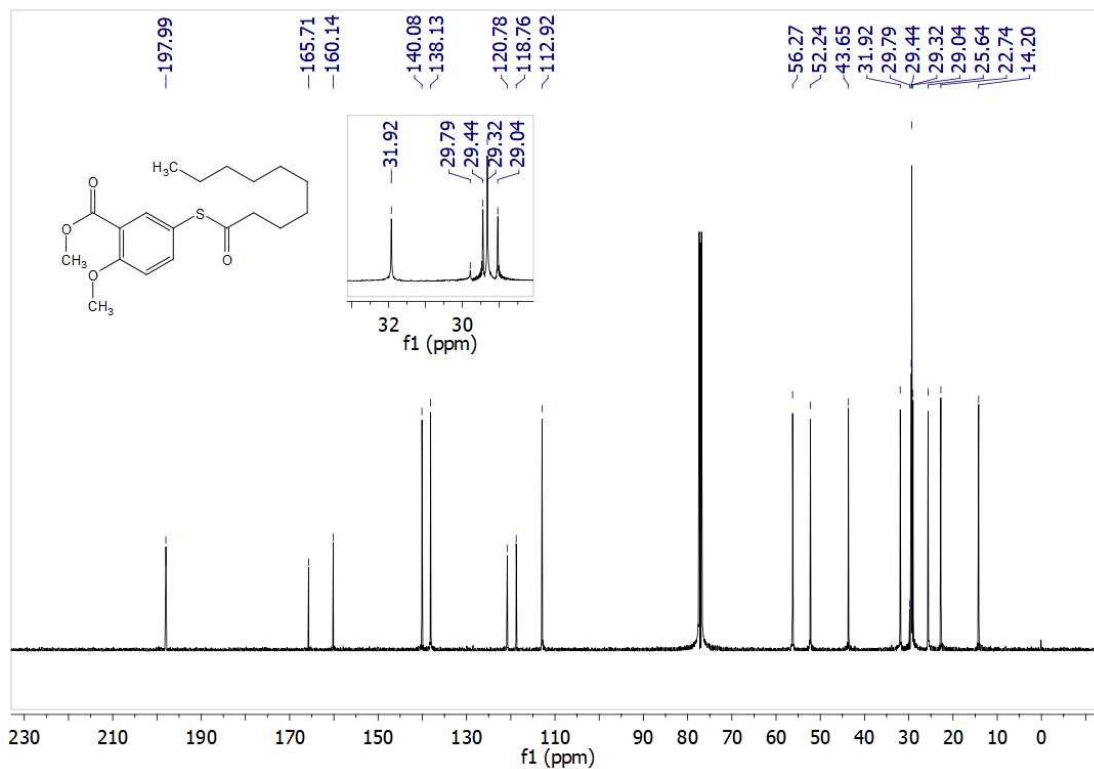

$^{13}\text{C}$  NMR (126 MHz,  $\text{CDCl}_3$ ) of compound 30.

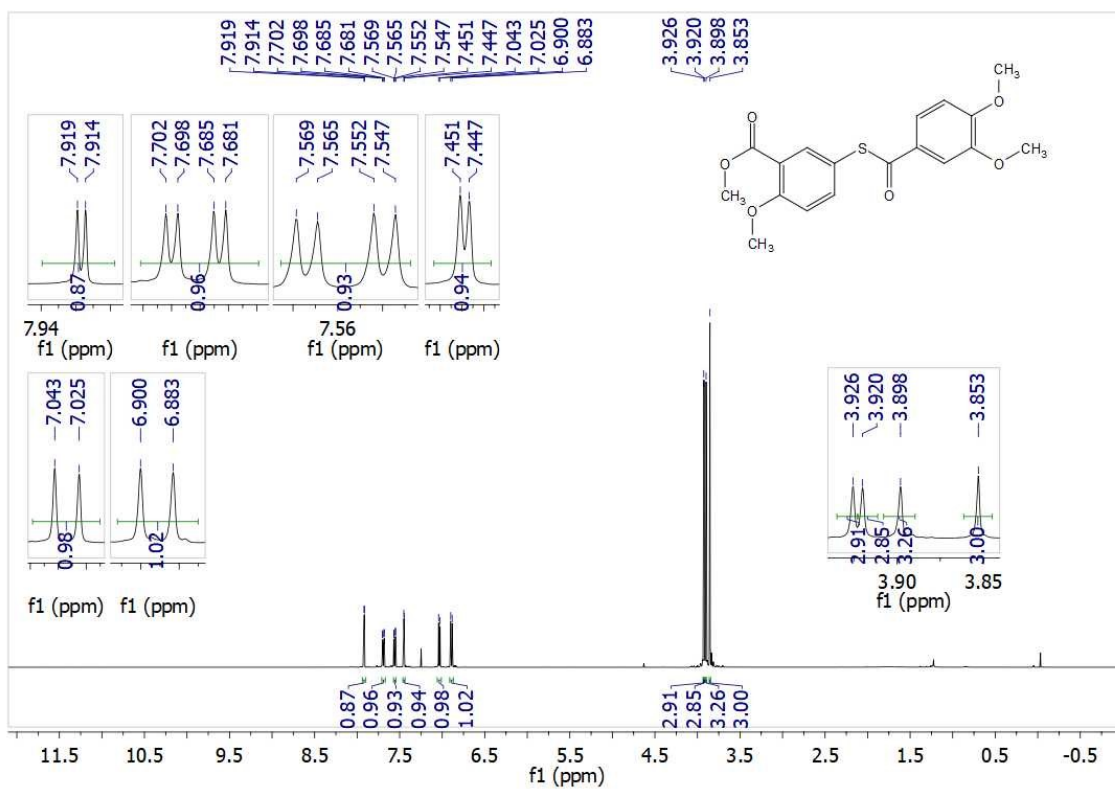

$^1\text{H}$  NMR (500 MHz,  $\text{CDCl}_3$ ) of compound 31.



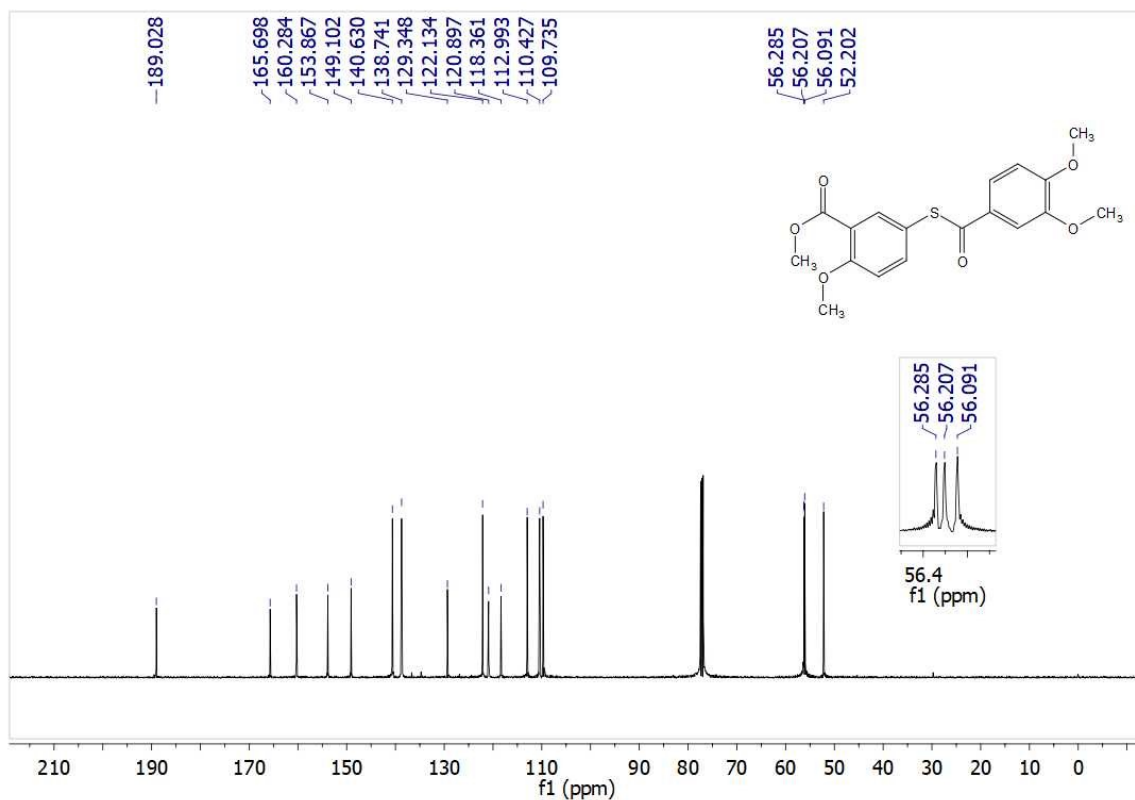

$^{13}\text{C}$  NMR (126 MHz,  $\text{CDCl}_3$ ) of compound 31.

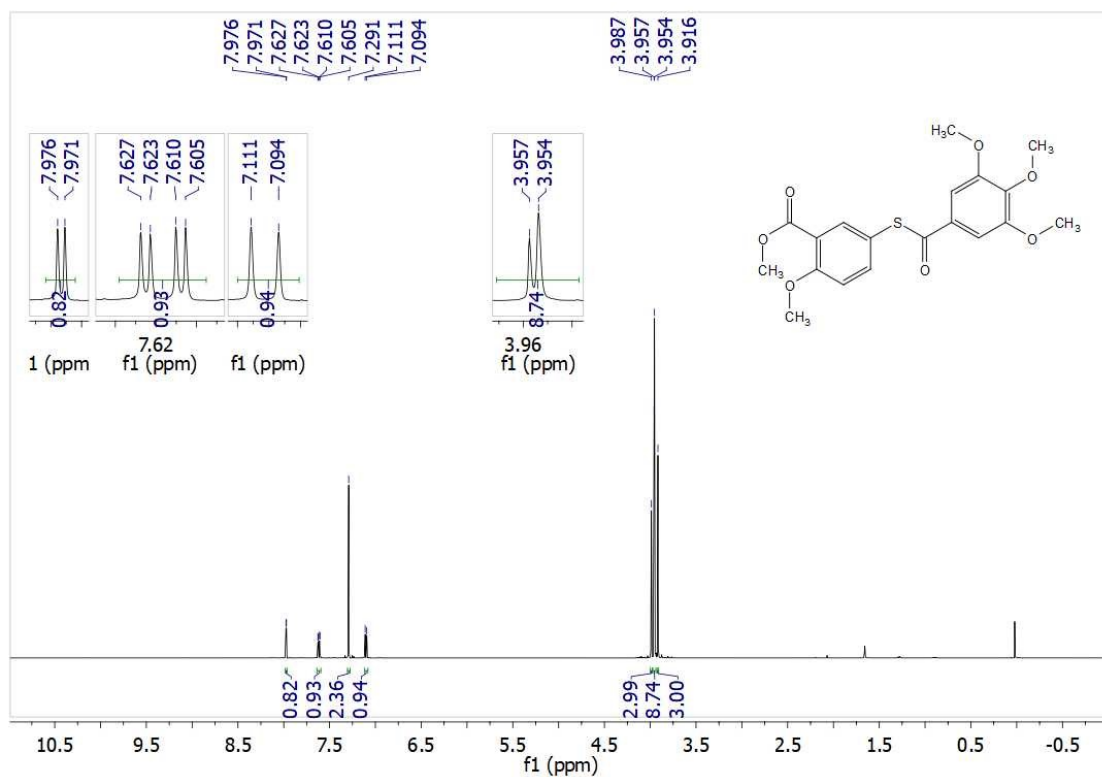

$^1\text{H}$  NMR (500 MHz,  $\text{CDCl}_3$ ) of compound 32.

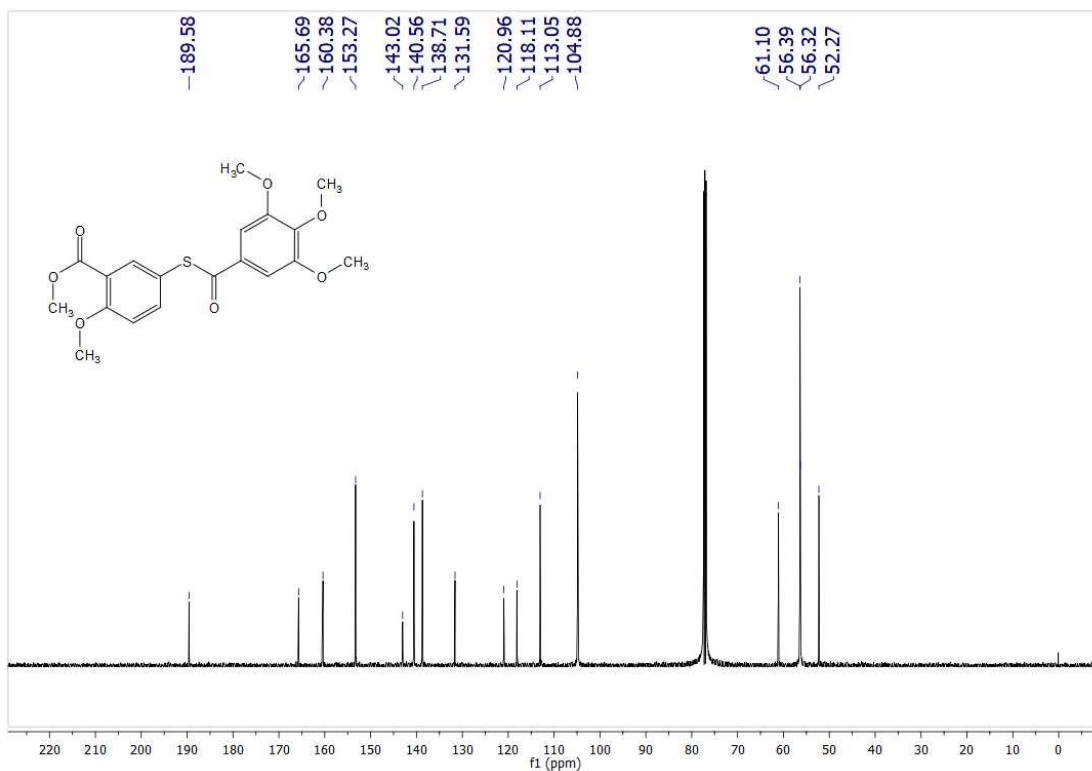

$^{13}\text{C}$  NMR (126 MHz,  $\text{CDCl}_3$ ) of compound 32.

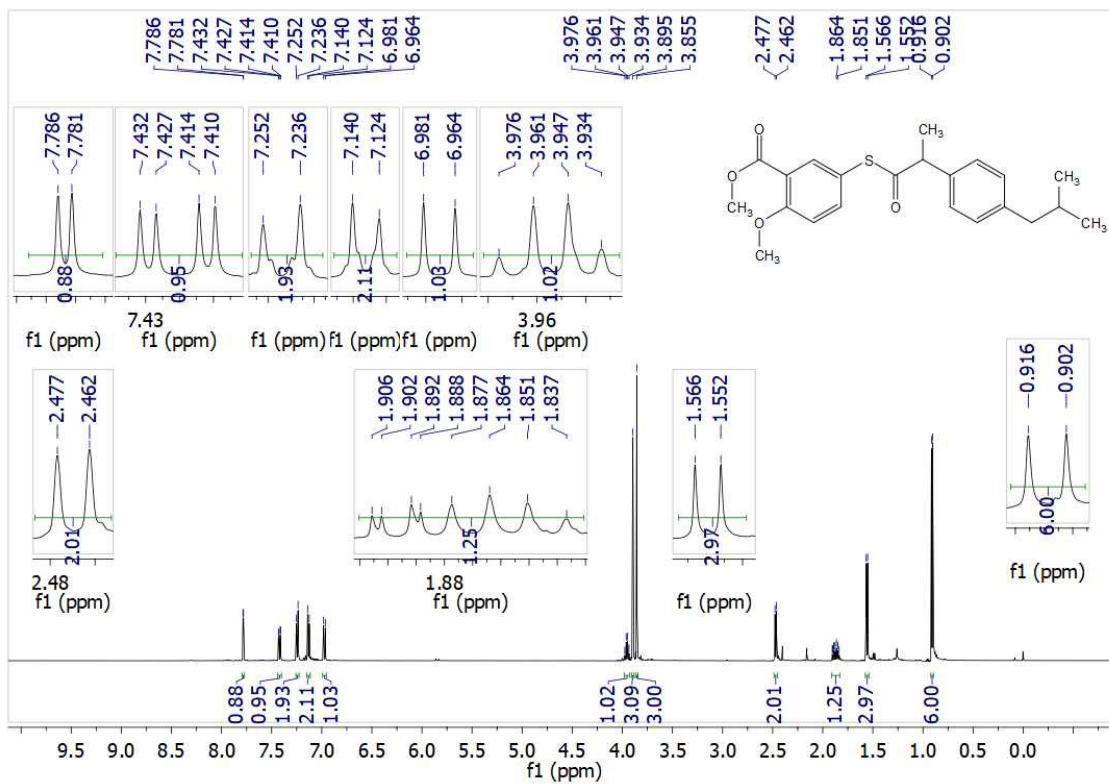

$^1\text{H}$  NMR (500 MHz,  $\text{CDCl}_3$ ) of compound 33.

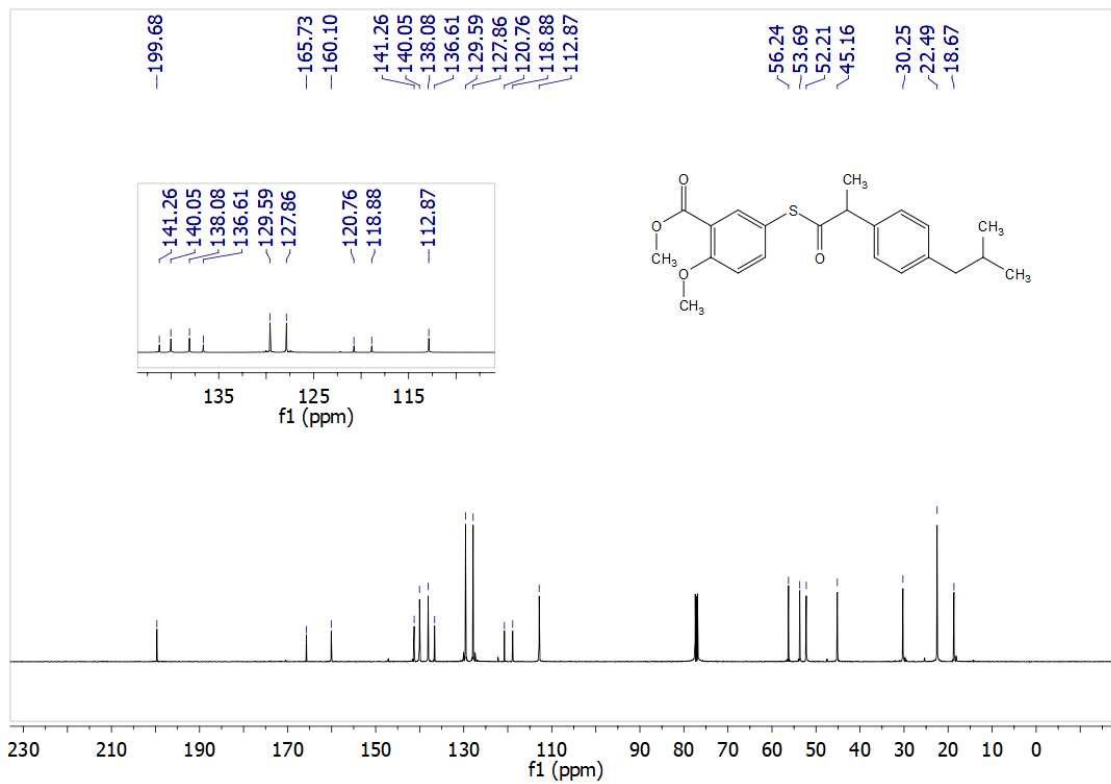

<sup>13</sup>C NMR (126 MHz, CDCl<sub>3</sub>) of compound 33.

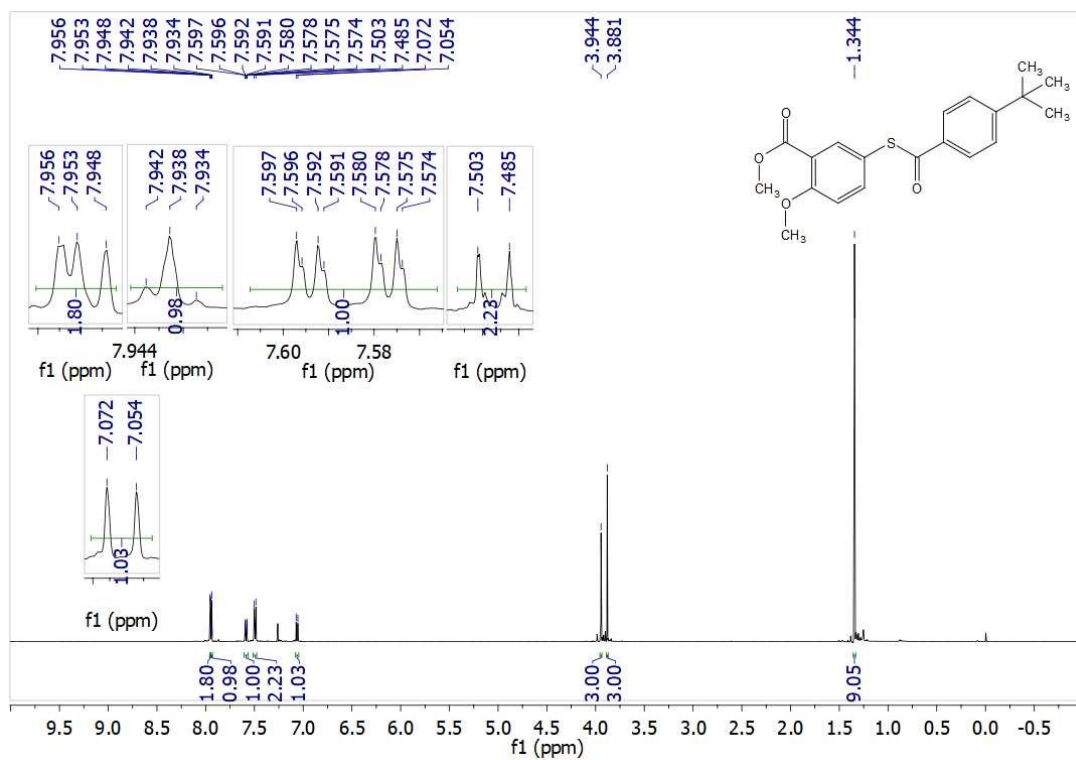

<sup>1</sup>H NMR (500 MHz, CDCl<sub>3</sub>) of compound 34.

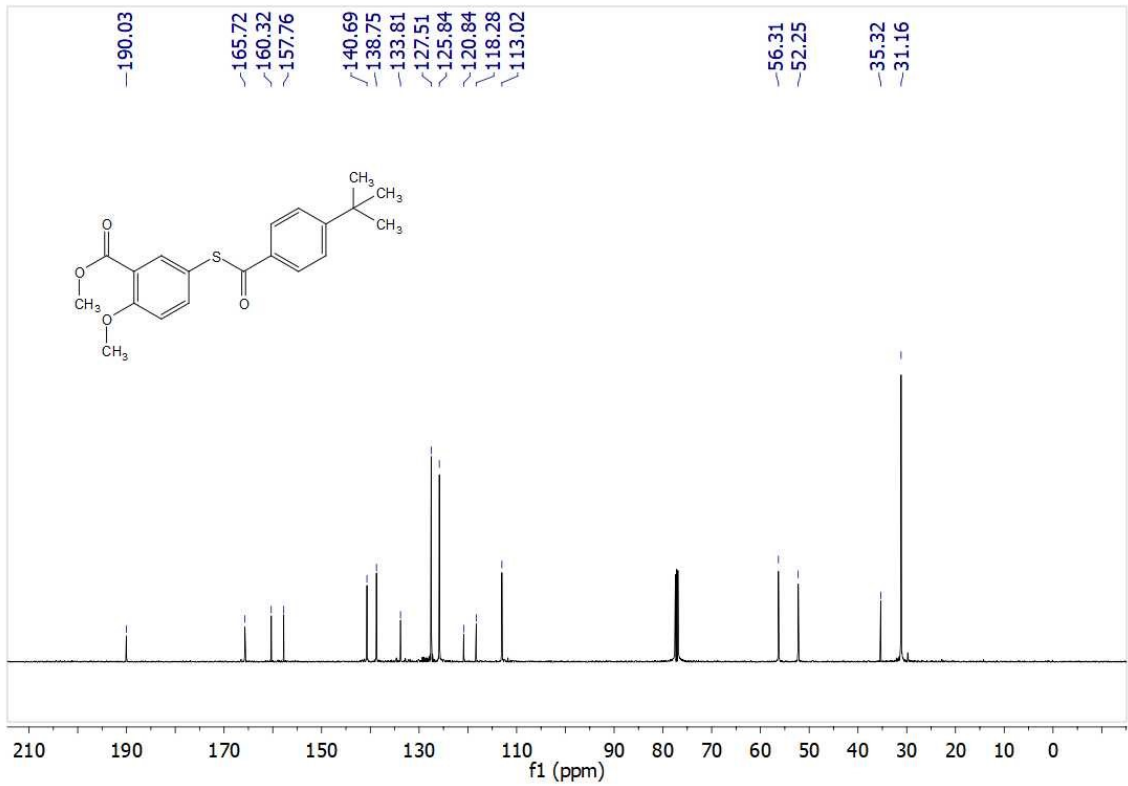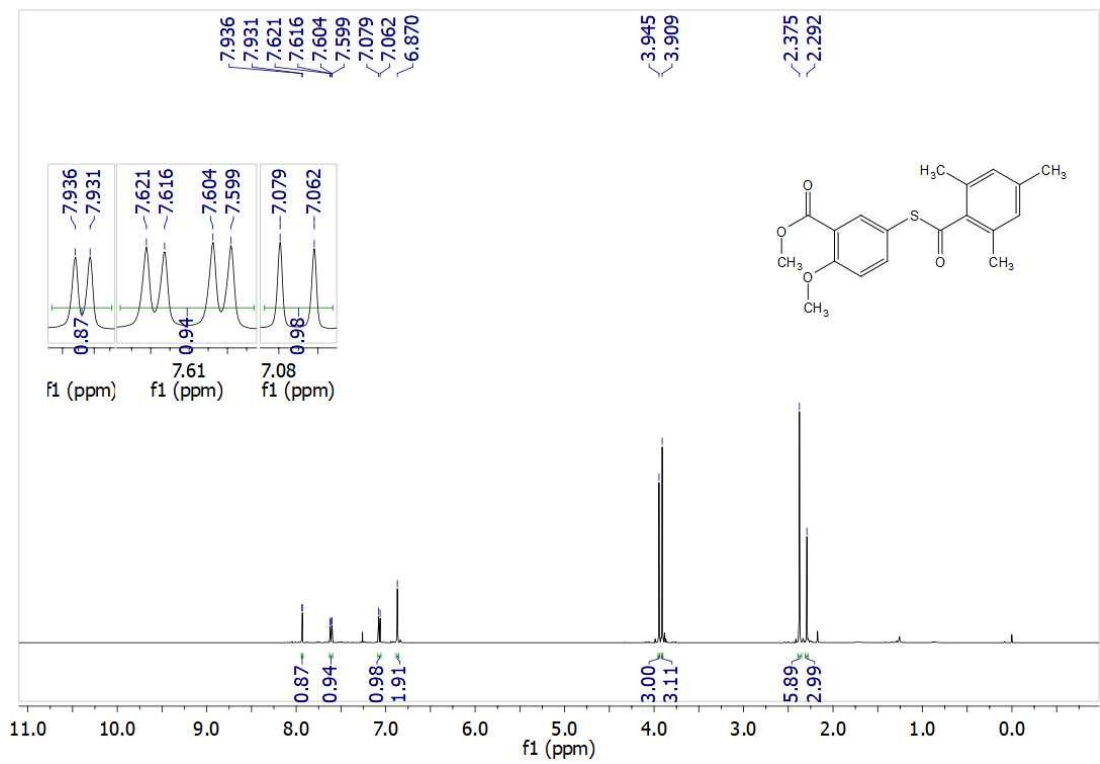

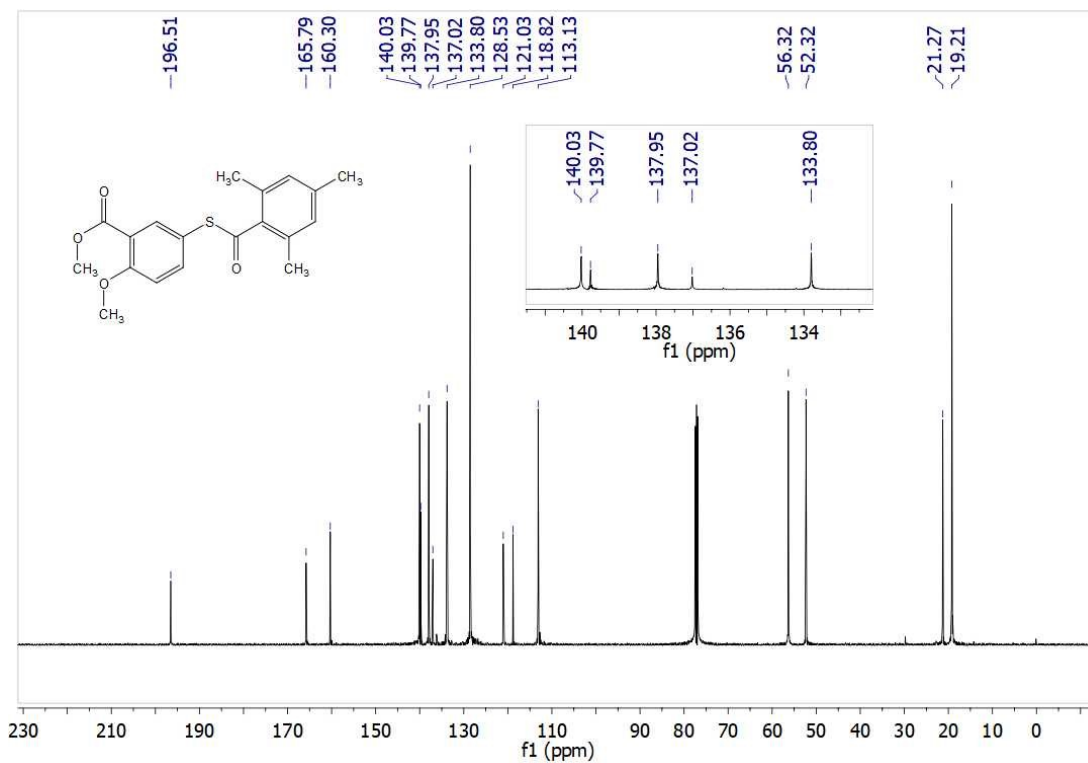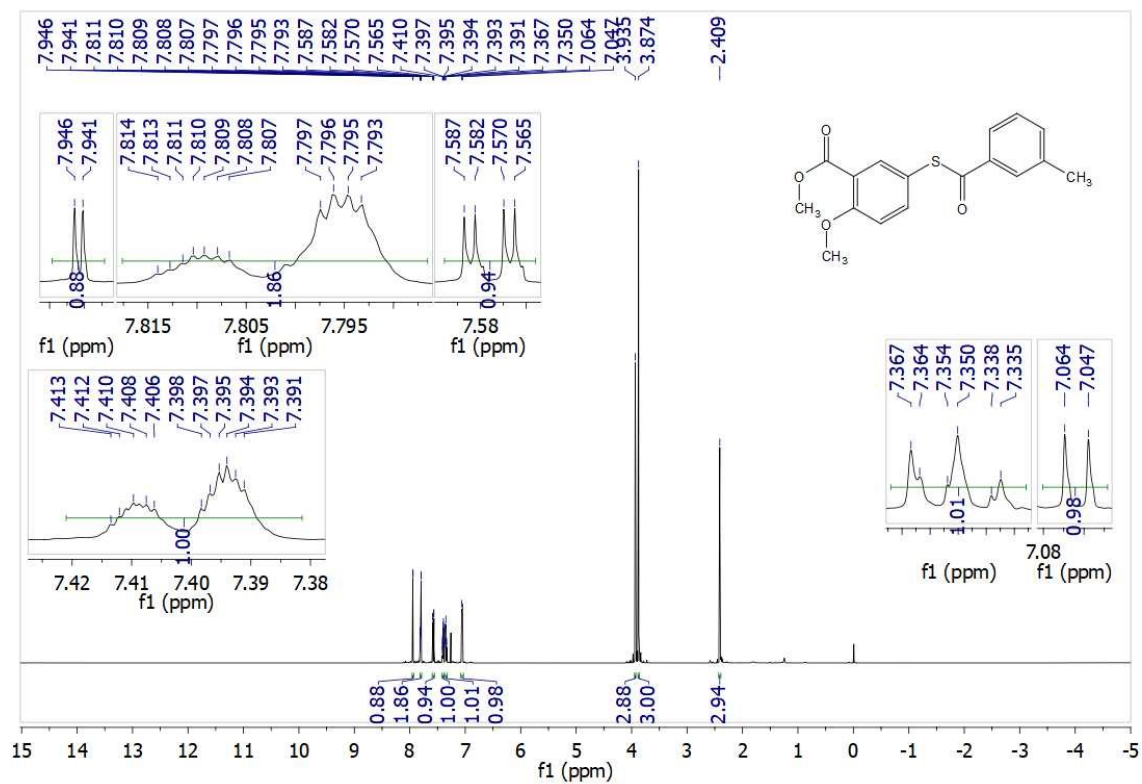

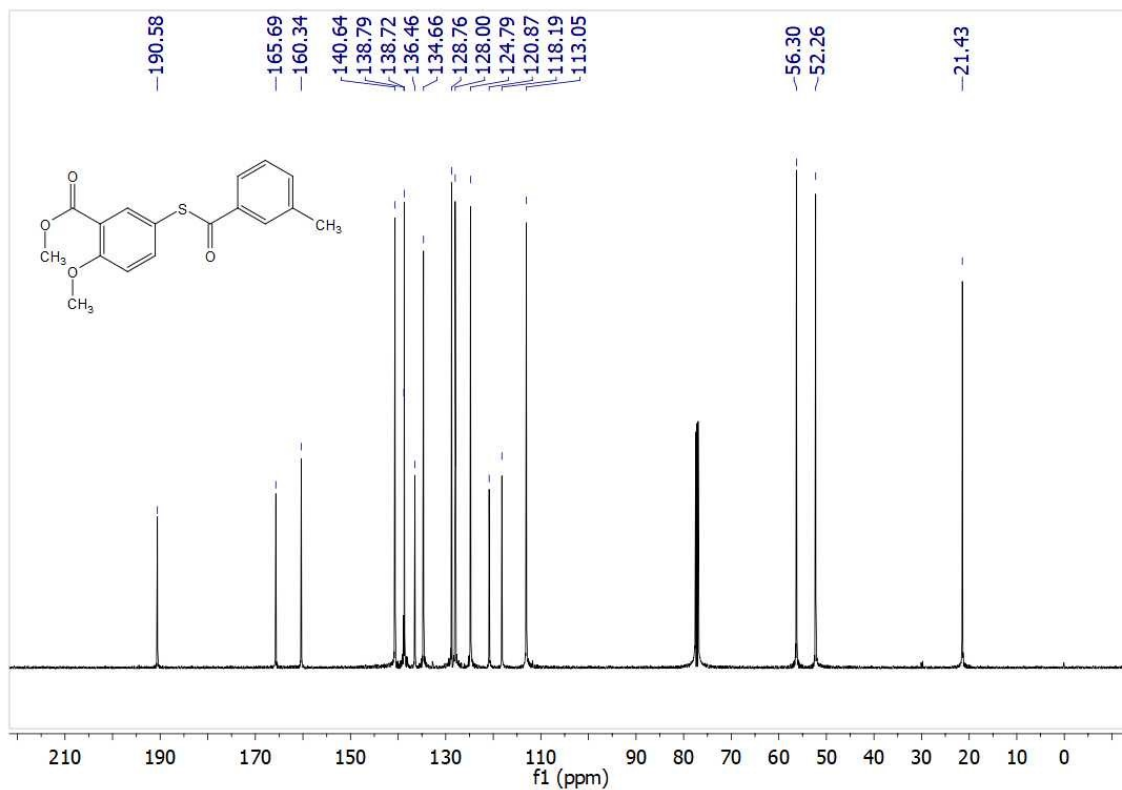

<sup>13</sup>C NMR (126 MHz, CDCl<sub>3</sub>) of compound 36.

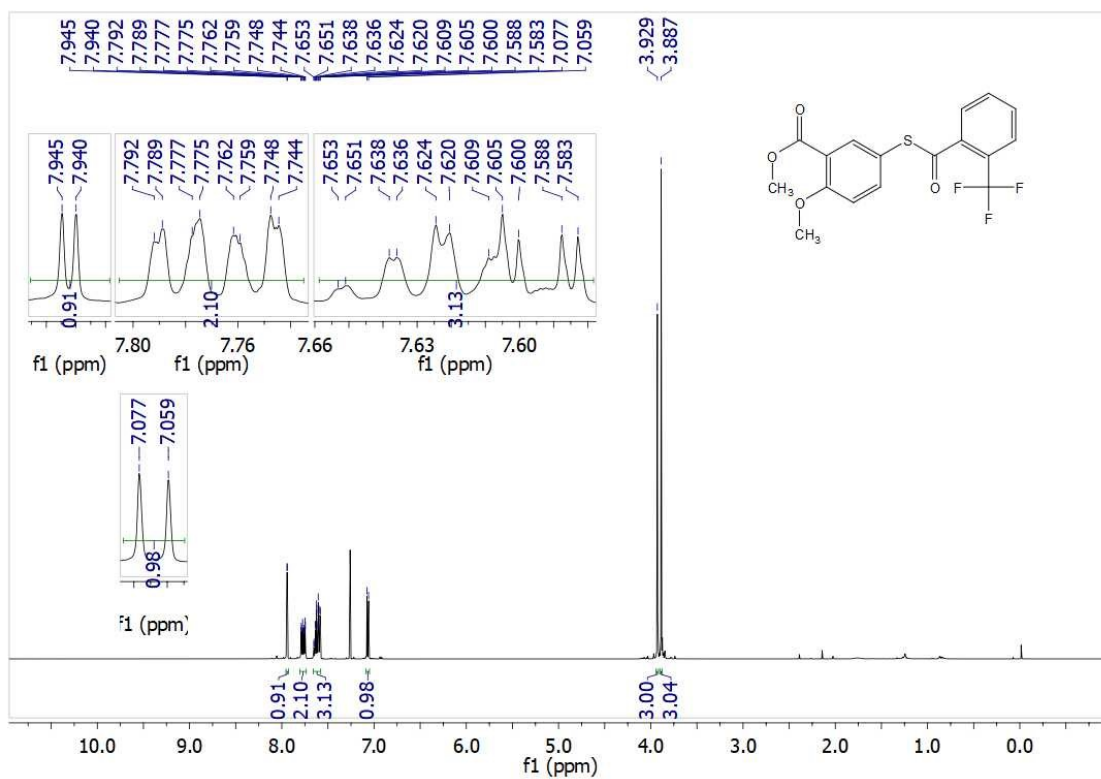

<sup>1</sup>H NMR (500 MHz, CDCl<sub>3</sub>) of compound 37.

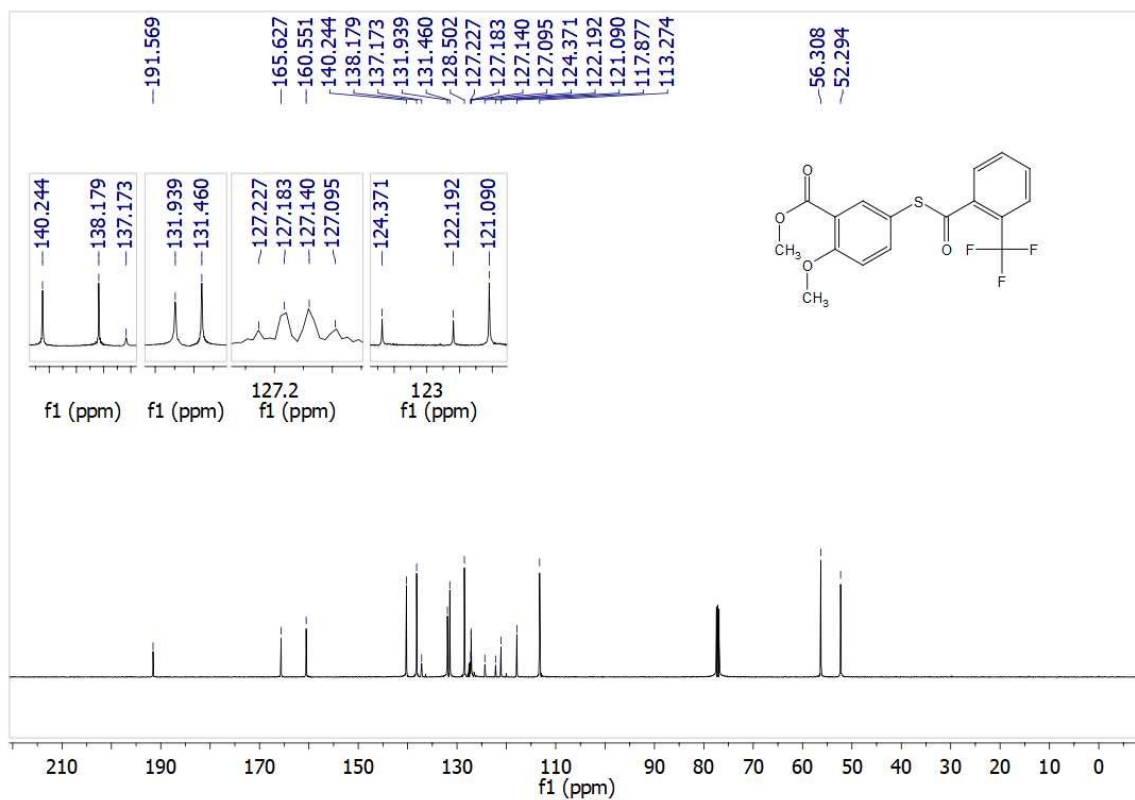

<sup>13</sup>C NMR (125 MHz, CDCl<sub>3</sub>) of compound 37.

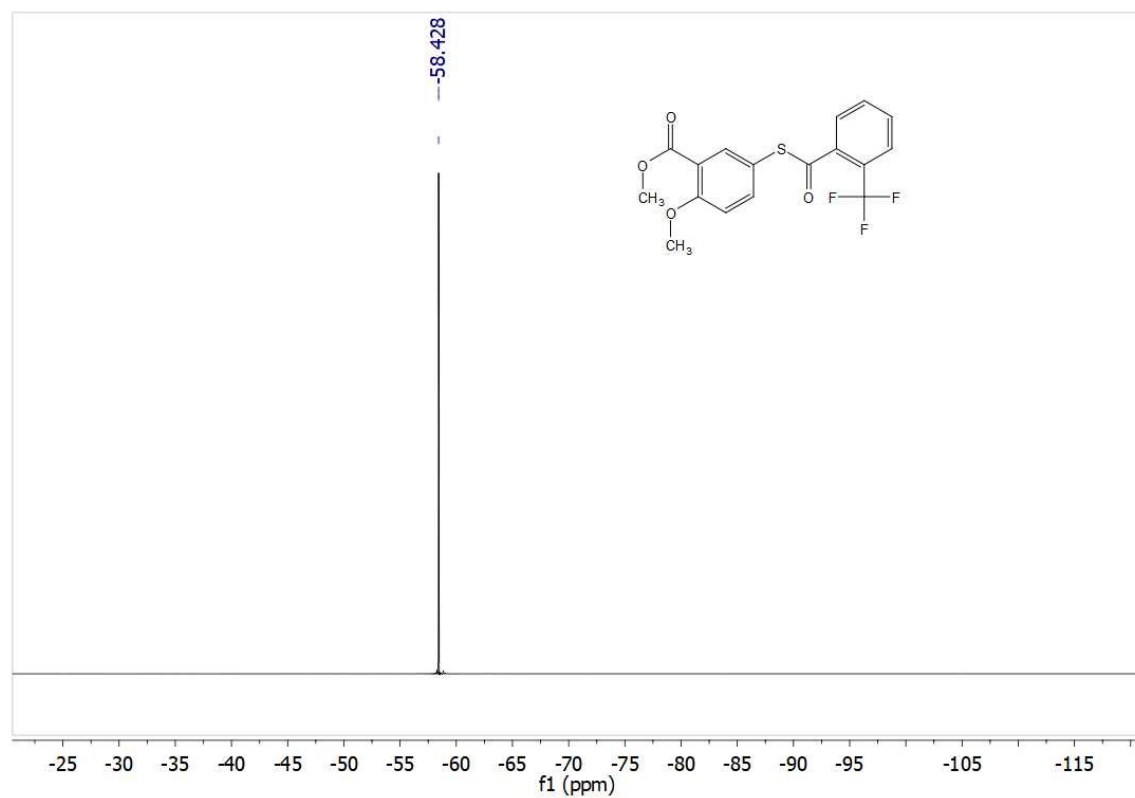

<sup>19</sup>F NMR (472 MHz, CDCl<sub>3</sub>) of compound 37.

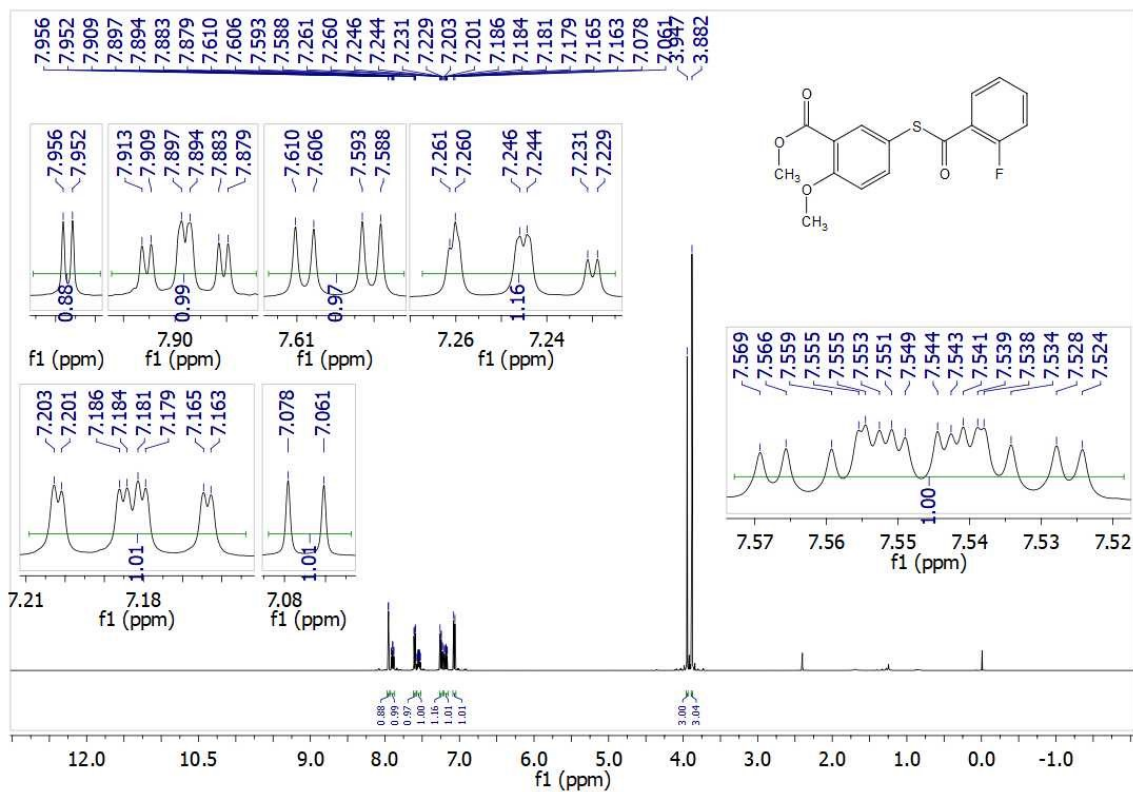

<sup>1</sup>H NMR (500 MHz, CDCl<sub>3</sub>) of compound 38.

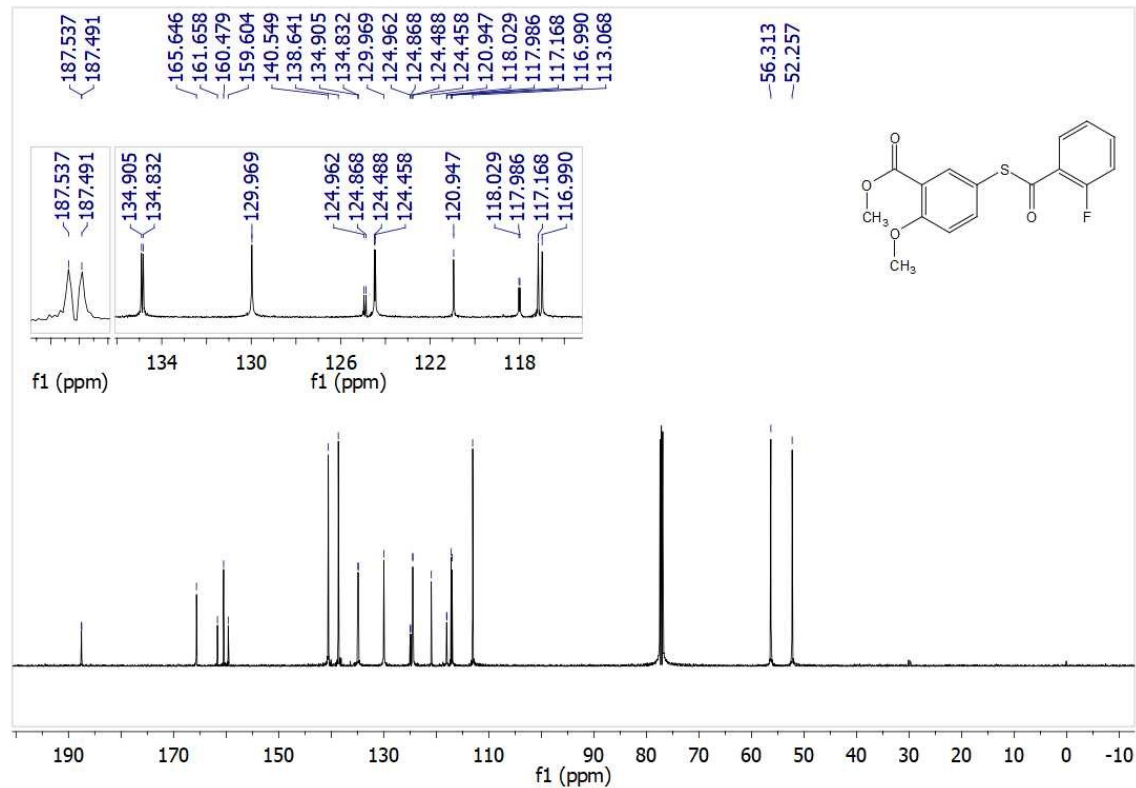

<sup>13</sup>C NMR (126 MHz, CDCl<sub>3</sub>) of compound 38.



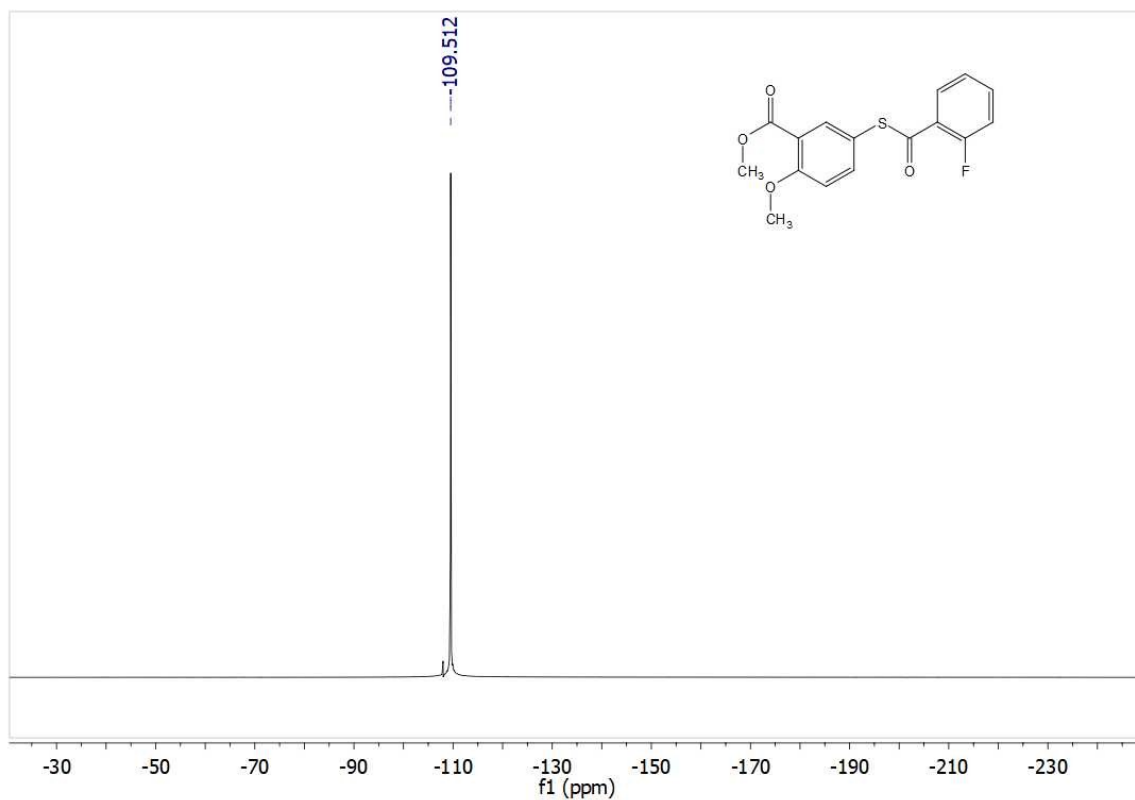

$^{19}\text{F}$  NMR (472 MHz,  $\text{CDCl}_3$ ) of compound 38.

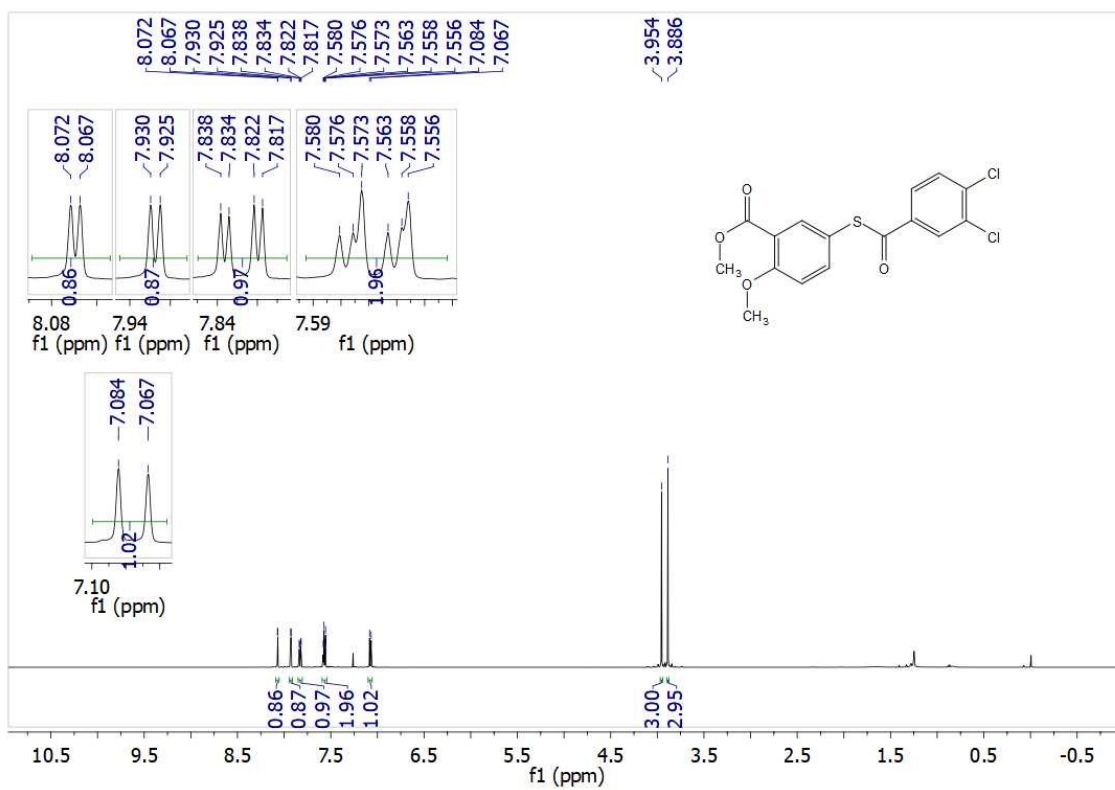

$^1\text{H}$  NMR (500 MHz,  $\text{CDCl}_3$ ) of compound 39.

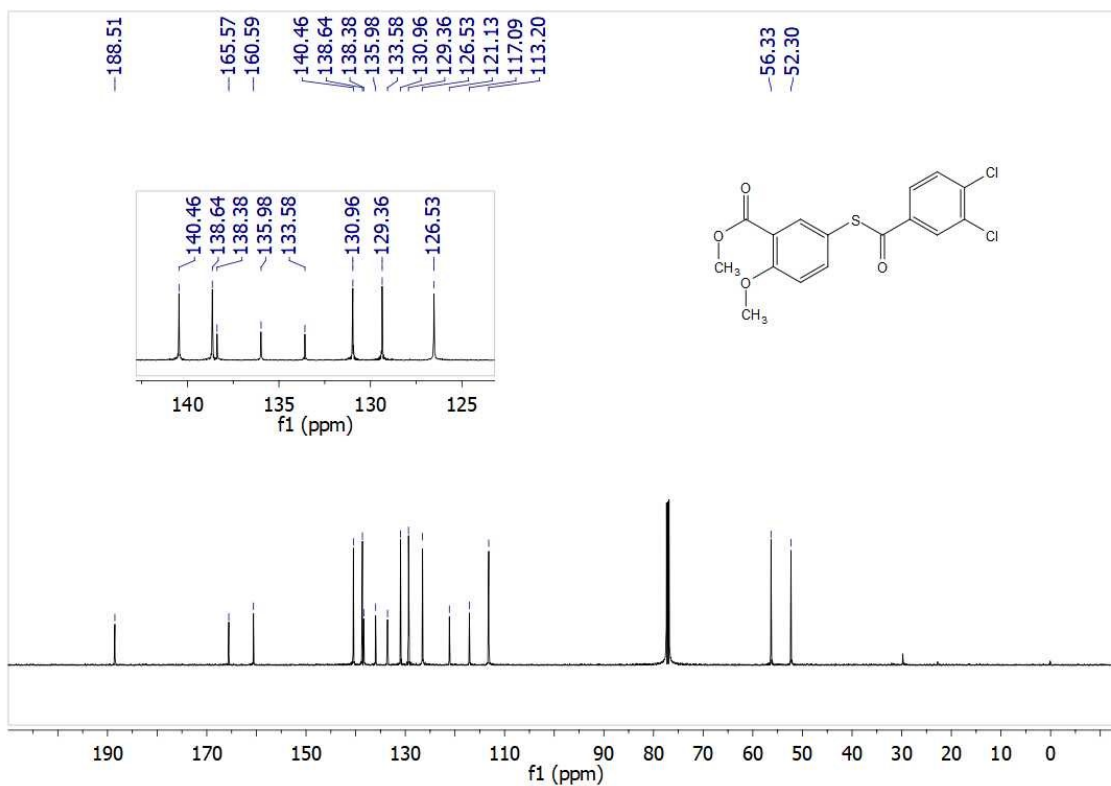

$^{13}\text{C}$  NMR (126 MHz,  $\text{CDCl}_3$ ) of compound 39.

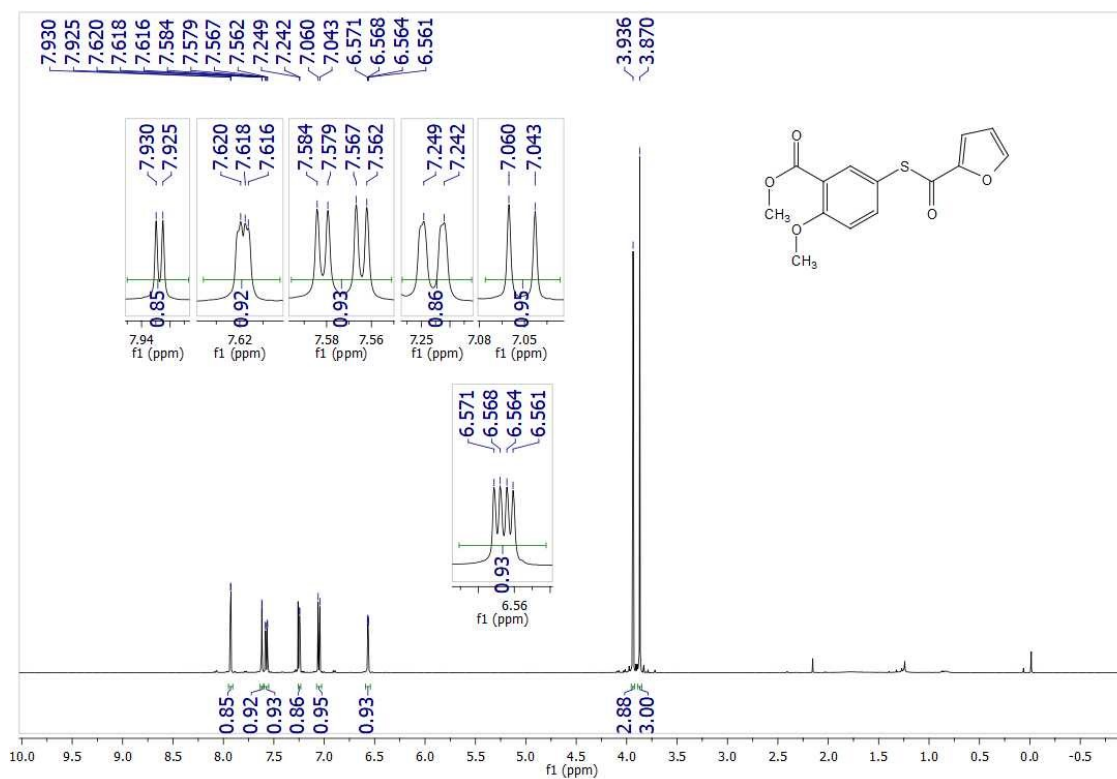

$^1\text{H}$  NMR (500 MHz,  $\text{CDCl}_3$ ) of compound 40.

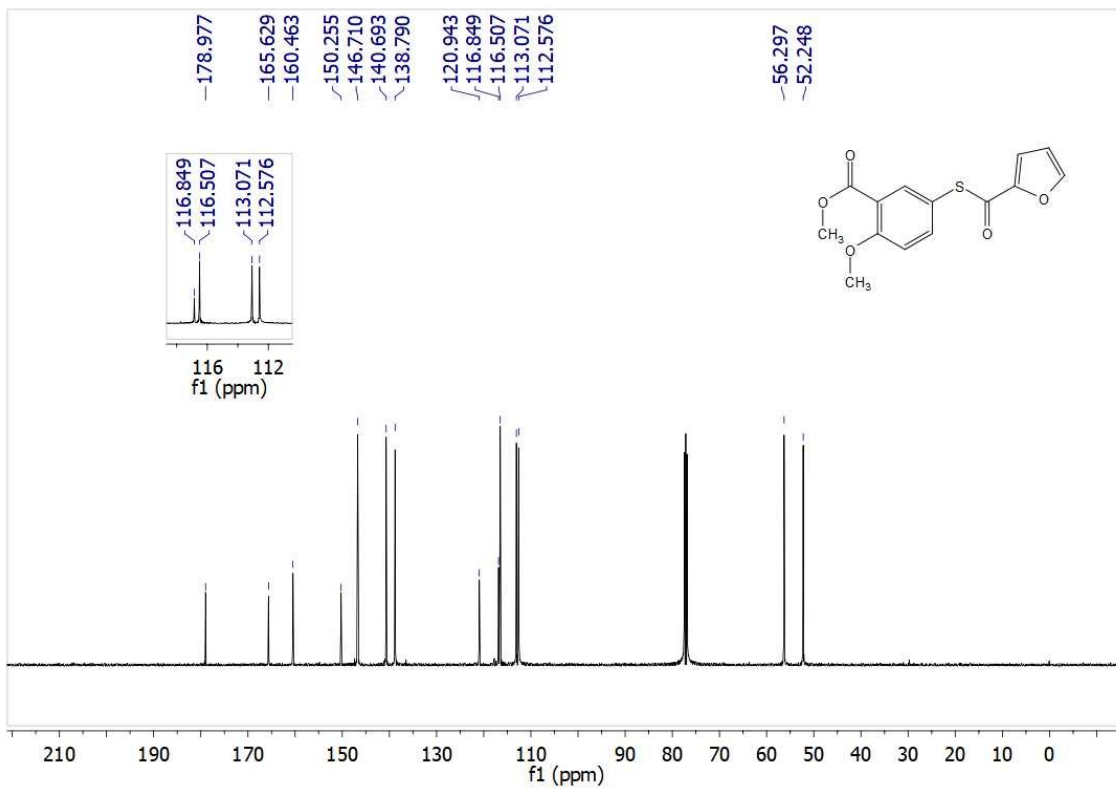

$^{13}\text{C}$  NMR (126 MHz,  $\text{CDCl}_3$ ) of compound 40.

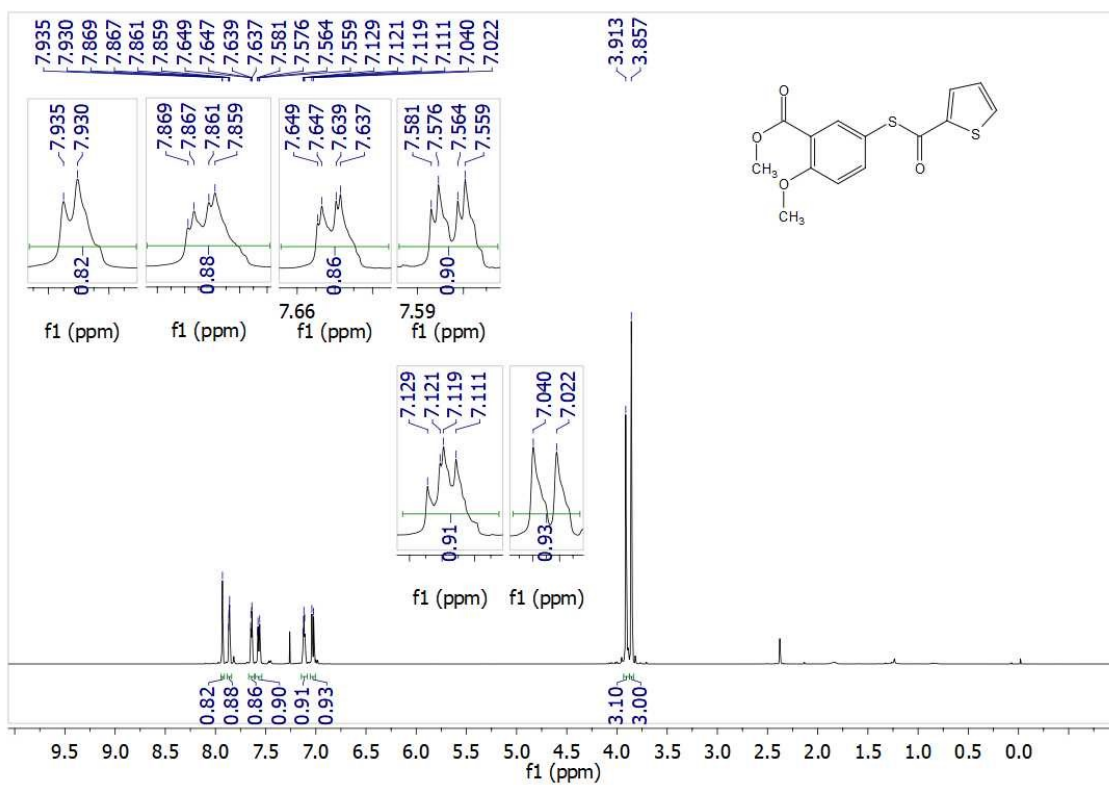

$^1\text{H}$  NMR (500 MHz,  $\text{CDCl}_3$ ) of compound 41.

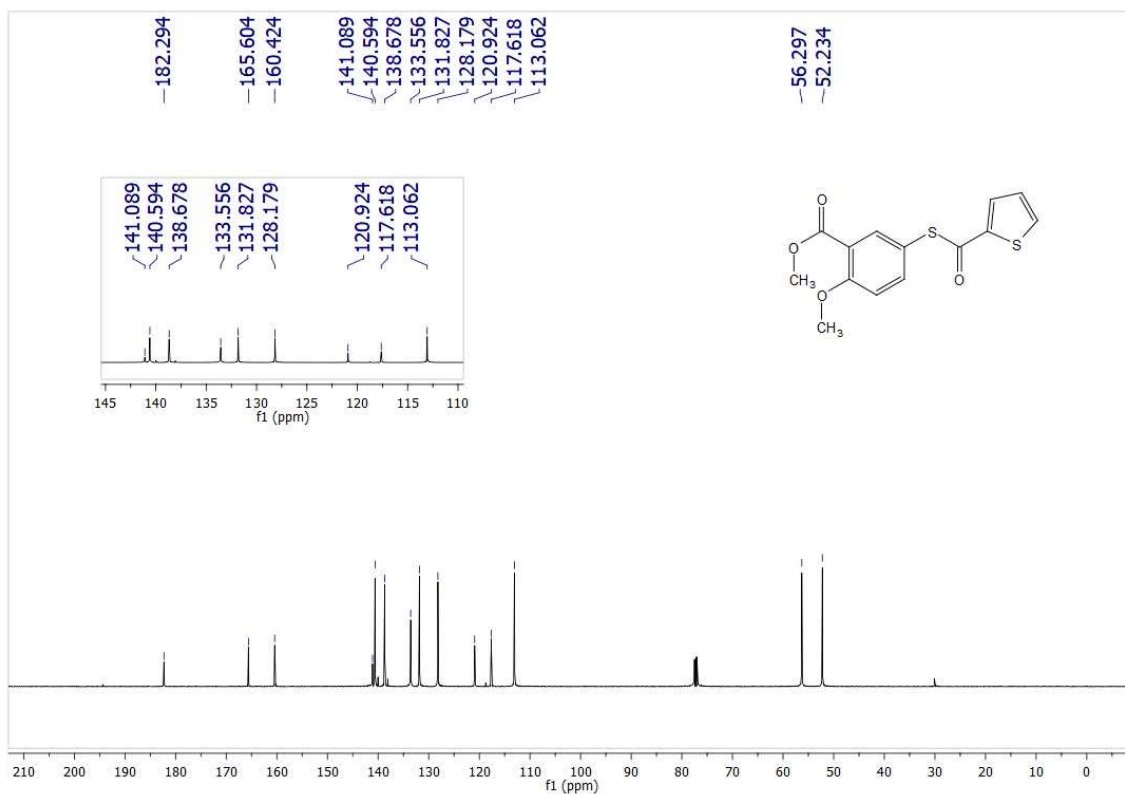

<sup>13</sup>C NMR (126 MHz, CDCl<sub>3</sub>) of compound 41.

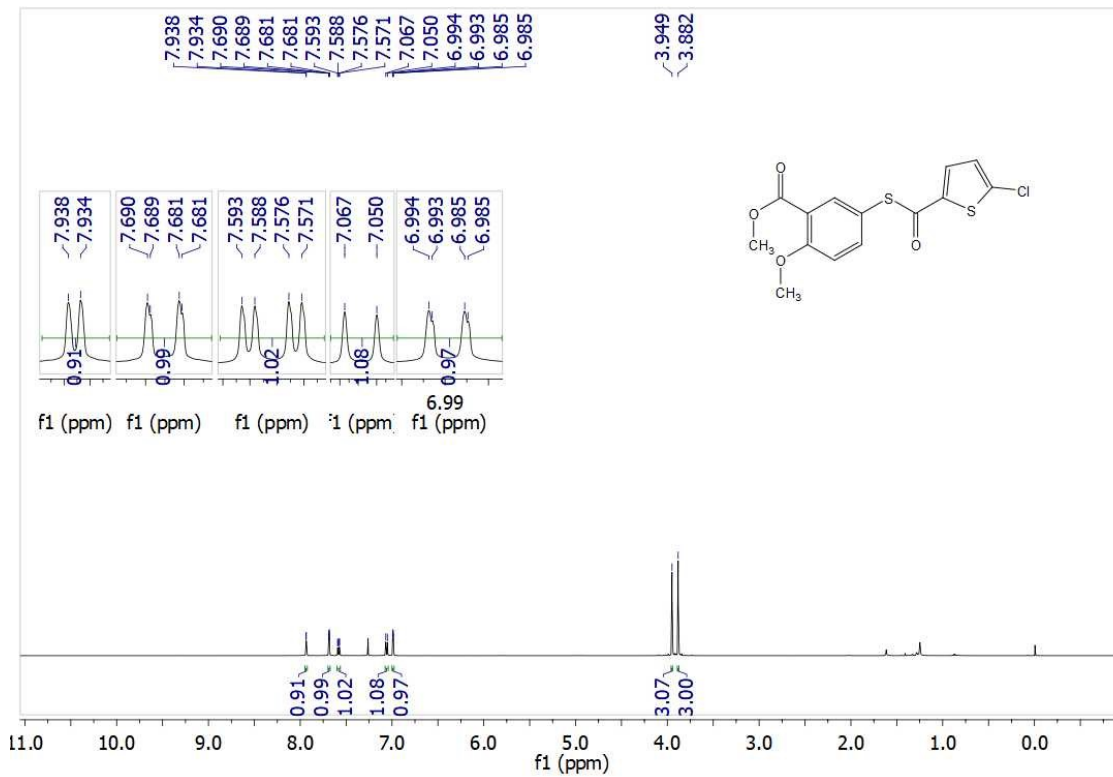

<sup>1</sup>H NMR (500 MHz, CDCl<sub>3</sub>) of compound 42.

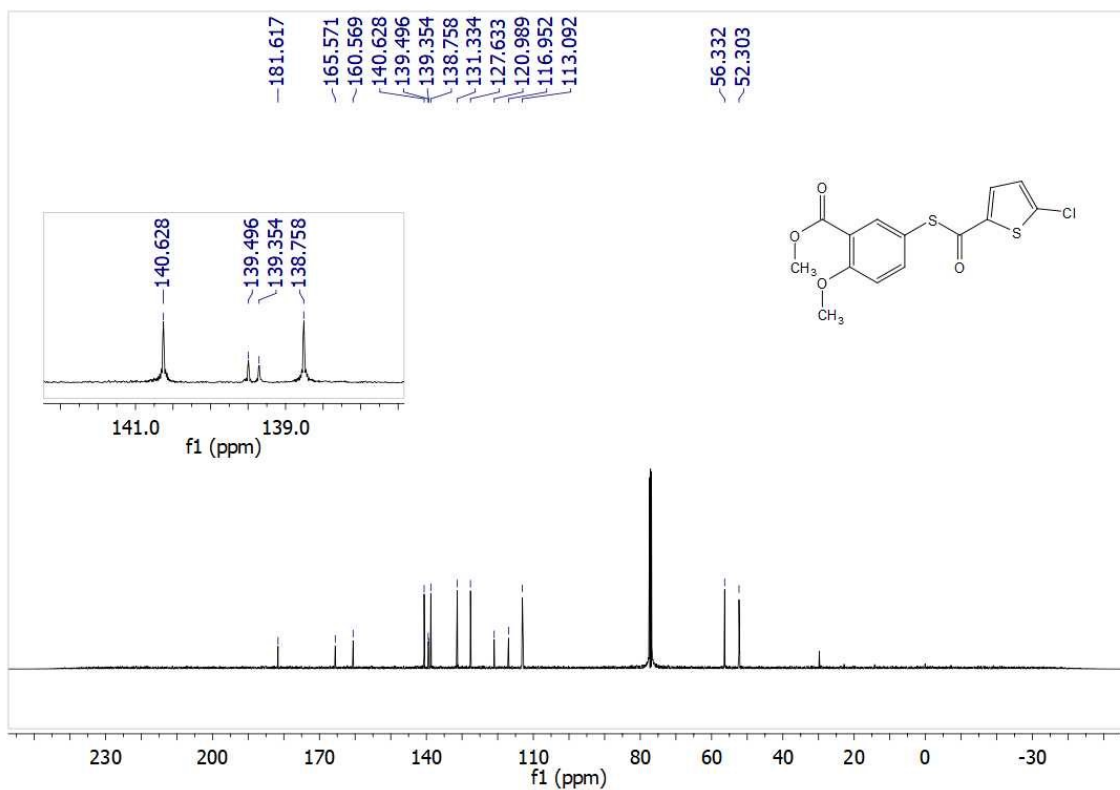

<sup>13</sup>C NMR (126 MHz, CDCl<sub>3</sub>) of compound 42.

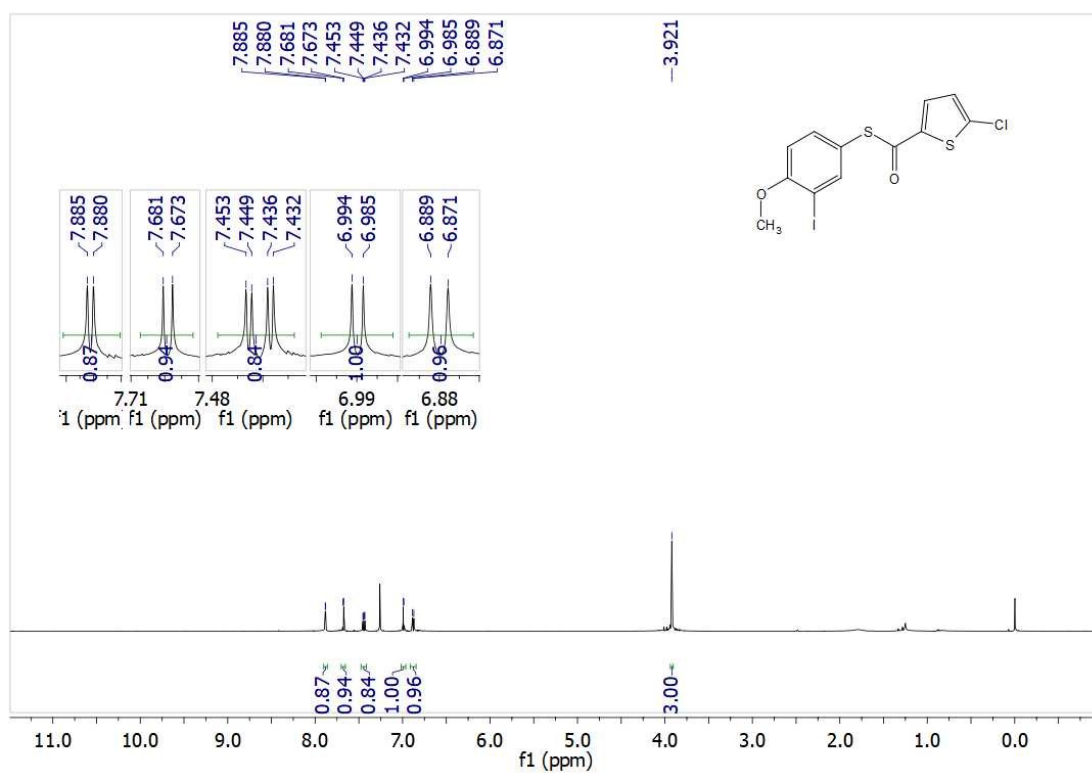

<sup>1</sup>H NMR (500 MHz, CDCl<sub>3</sub>) of compound 43.

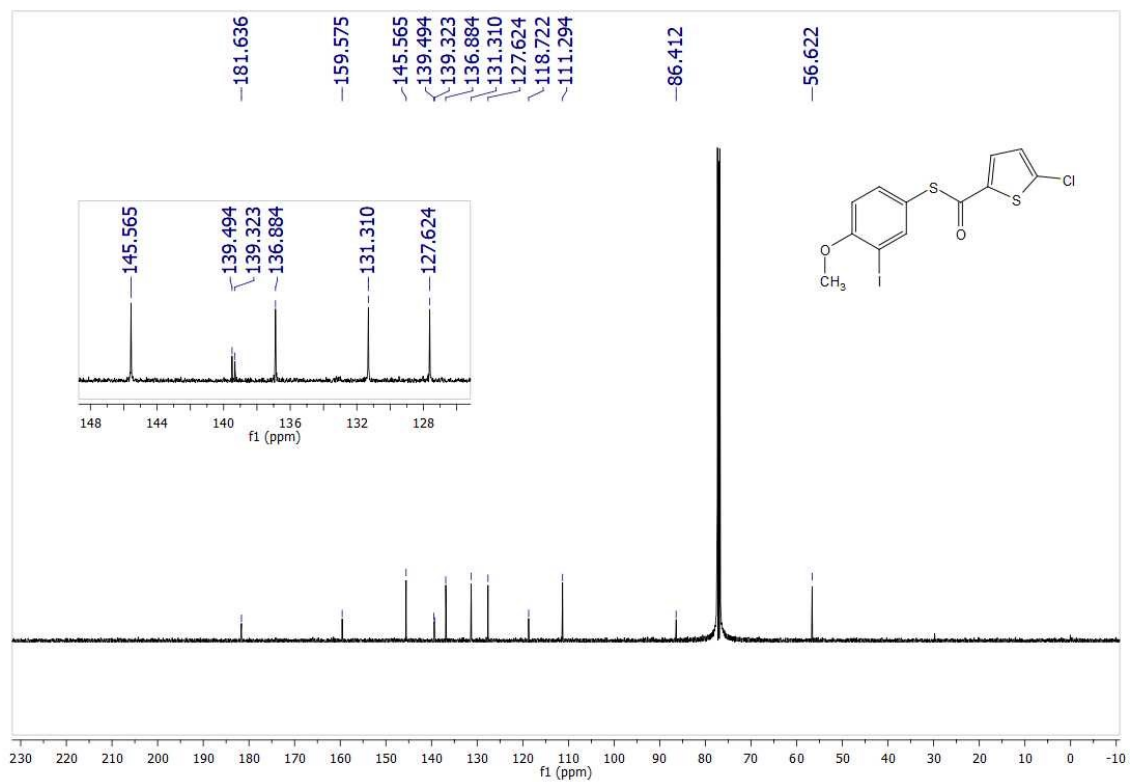

$^{13}\text{C}$  NMR (126 MHz,  $\text{CDCl}_3$ ) of compound 43.

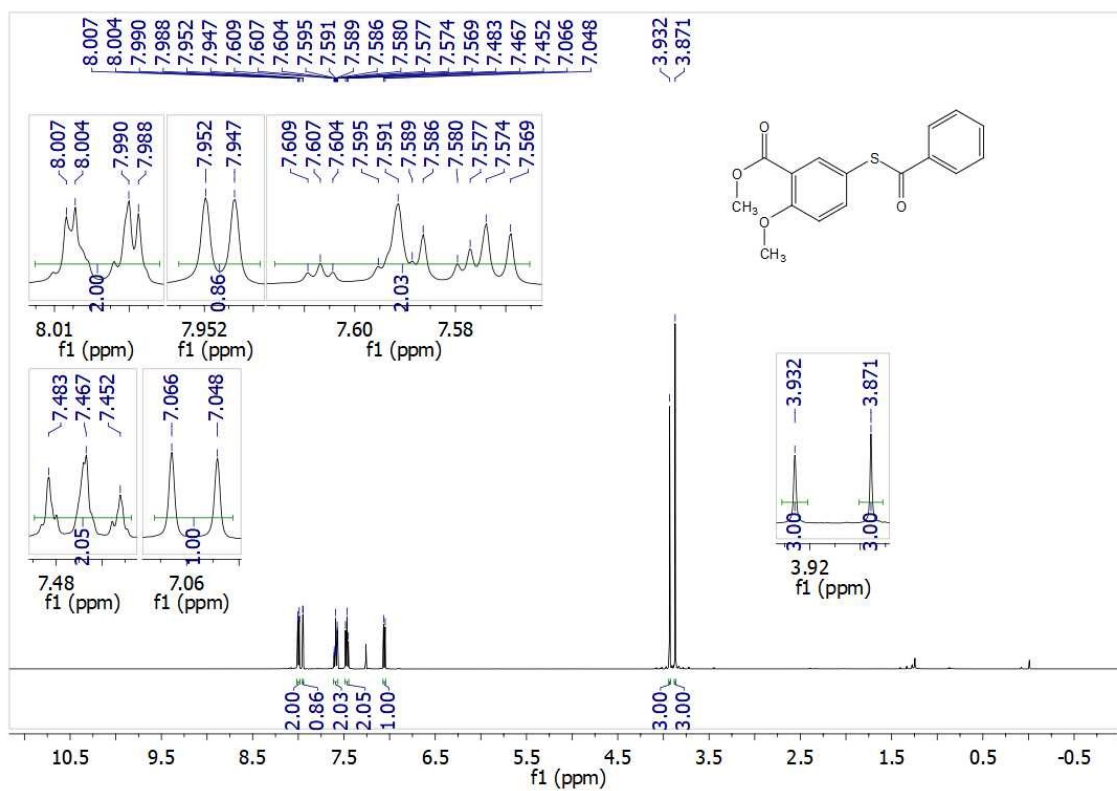

$^1\text{H}$  NMR (500 MHz,  $\text{CDCl}_3$ ) of compound 44.

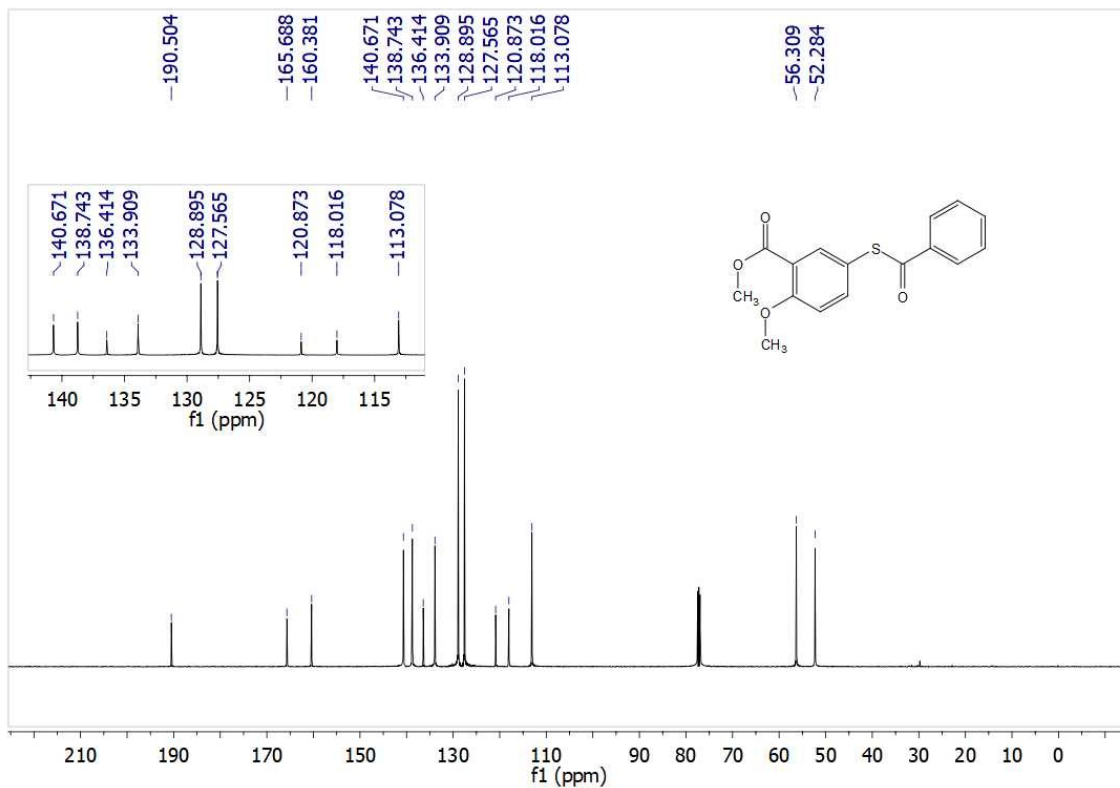

<sup>13</sup>C NMR (126 MHz, CDCl<sub>3</sub>) of compound 44.

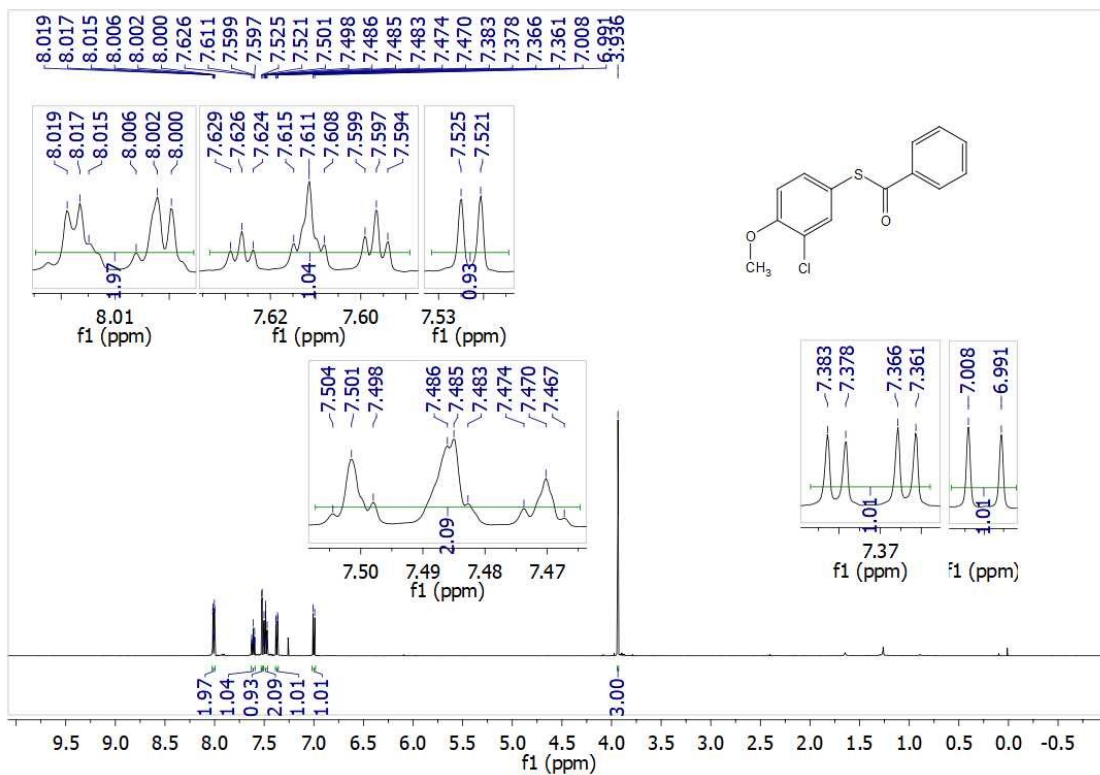

<sup>1</sup>H NMR (500 MHz, CDCl<sub>3</sub>) of compound 45.

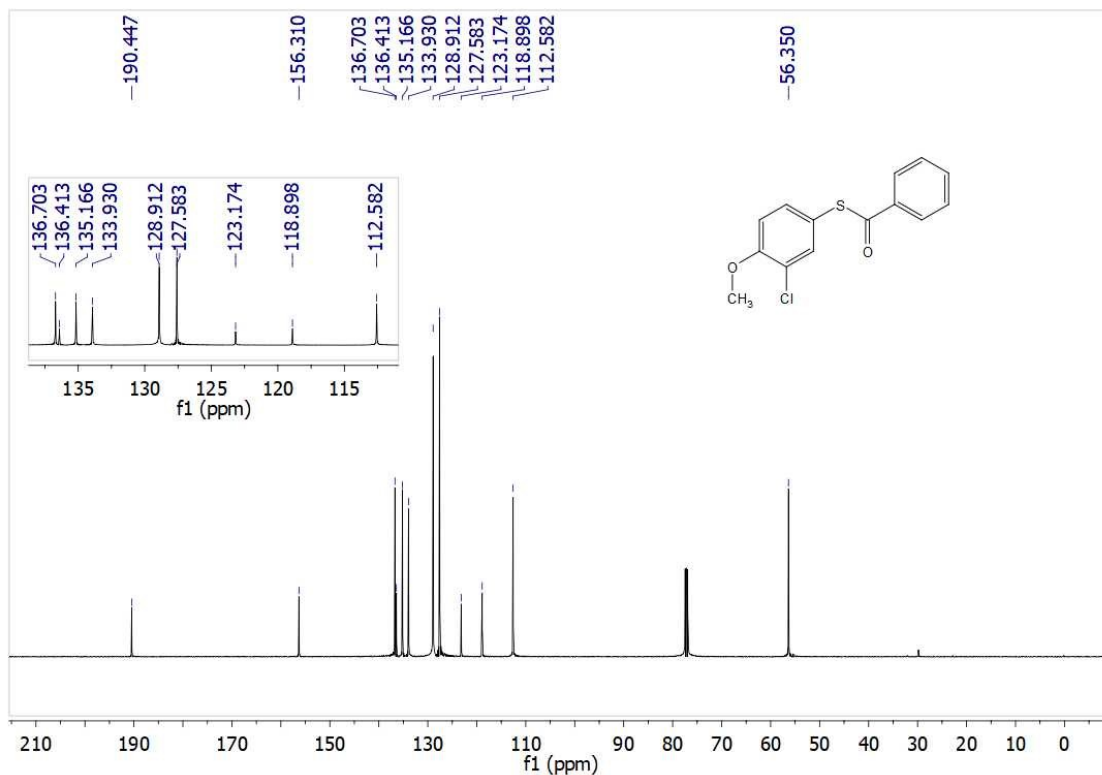

$^{13}\text{C}$  NMR (126 MHz,  $\text{CDCl}_3$ ) of compound 45.

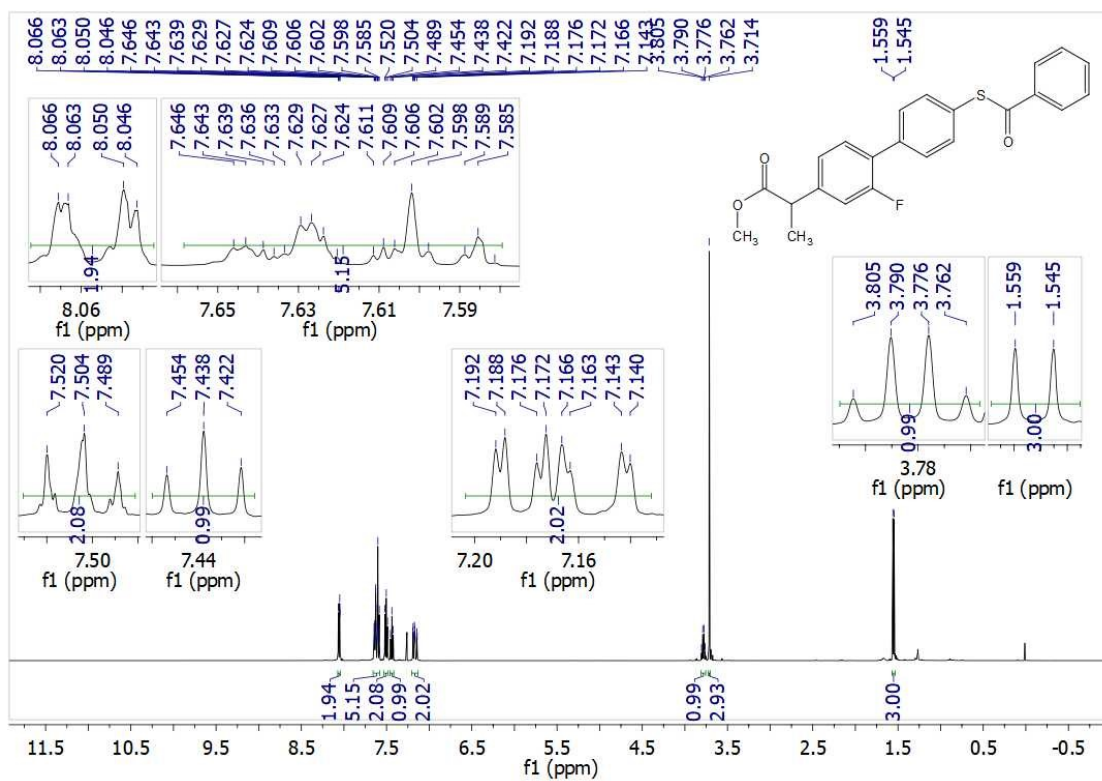

$^1\text{H}$  NMR (500 MHz,  $\text{CDCl}_3$ ) of compound 46.



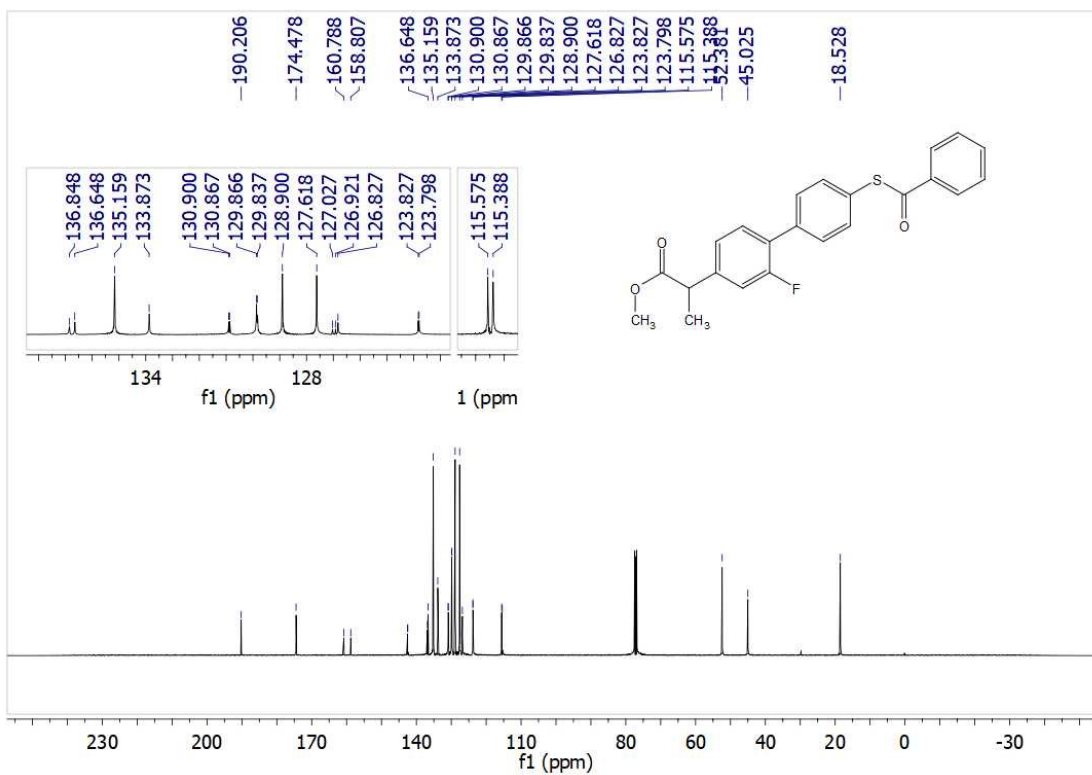

<sup>13</sup>C NMR (126 MHz, CDCl<sub>3</sub>) of compound 46.

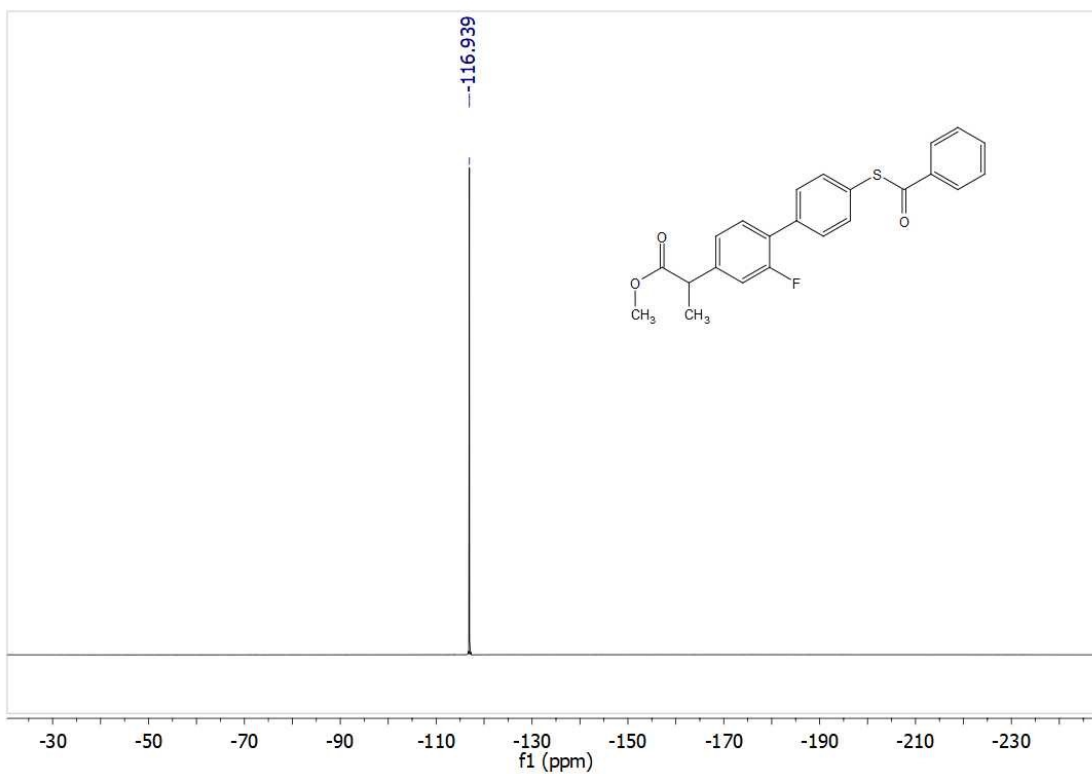

<sup>19</sup>F NMR (472 MHz, CDCl<sub>3</sub>) of compound 46.

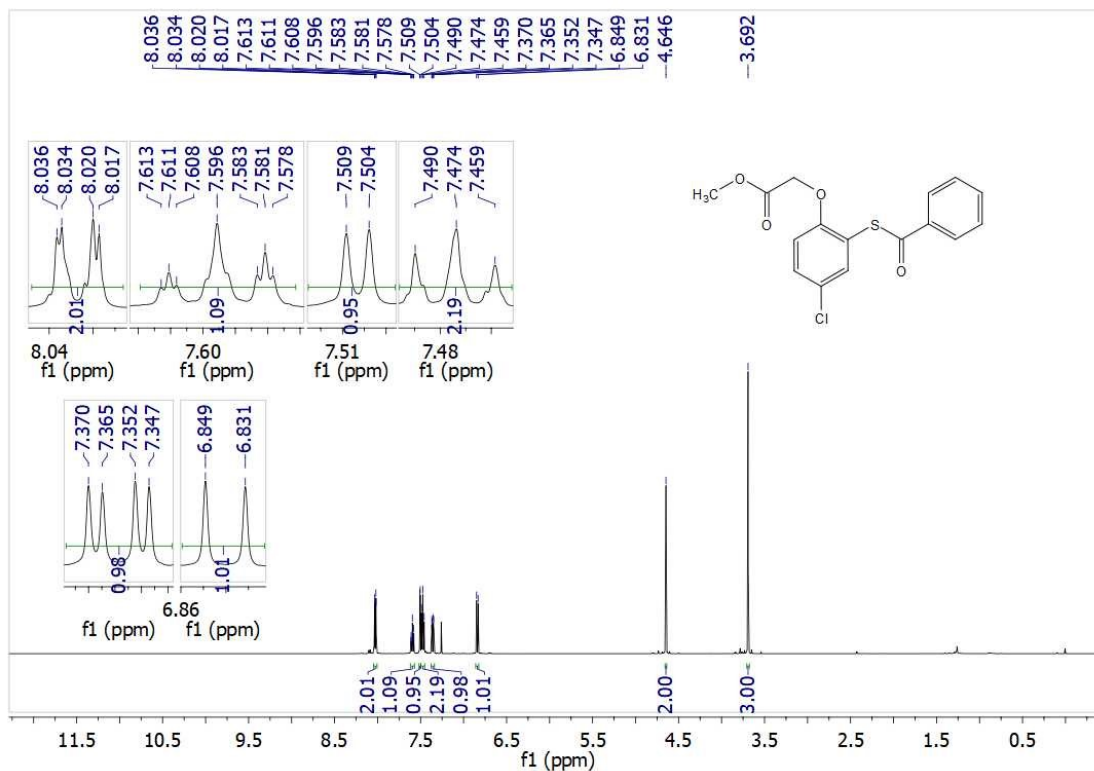

<sup>1</sup>H NMR (500 MHz, CDCl<sub>3</sub>) of compound 47.

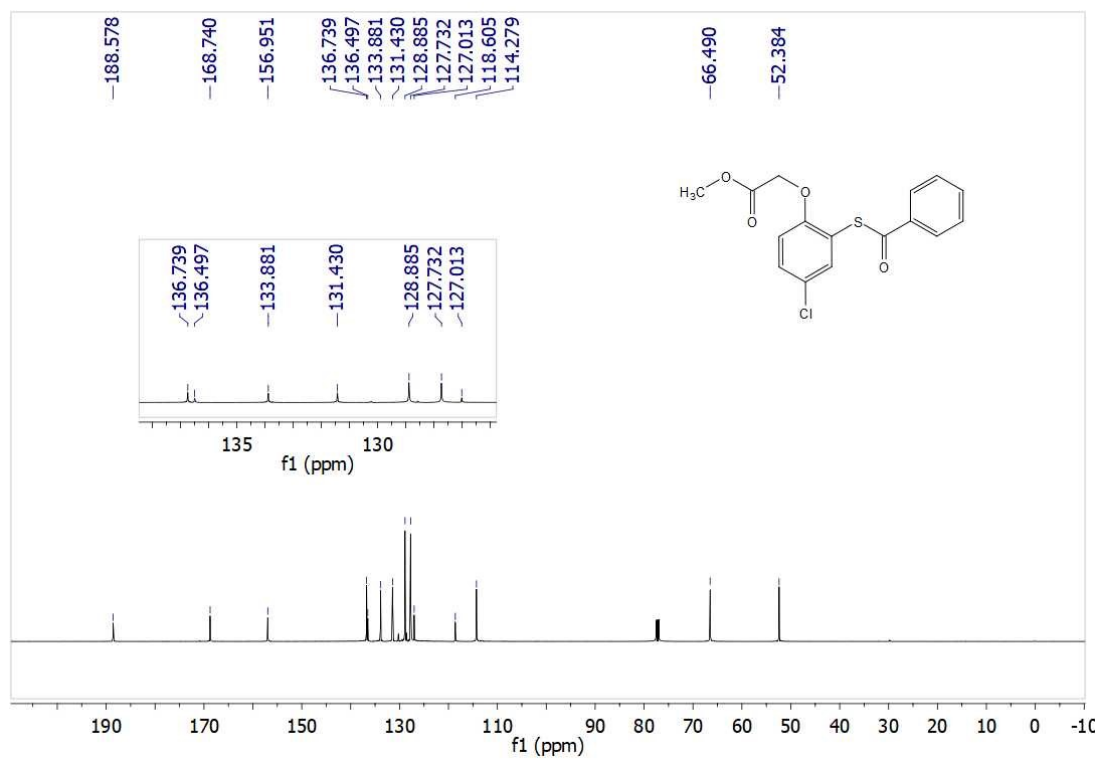

<sup>13</sup>C NMR (126 MHz, CDCl<sub>3</sub>) of compound 47.

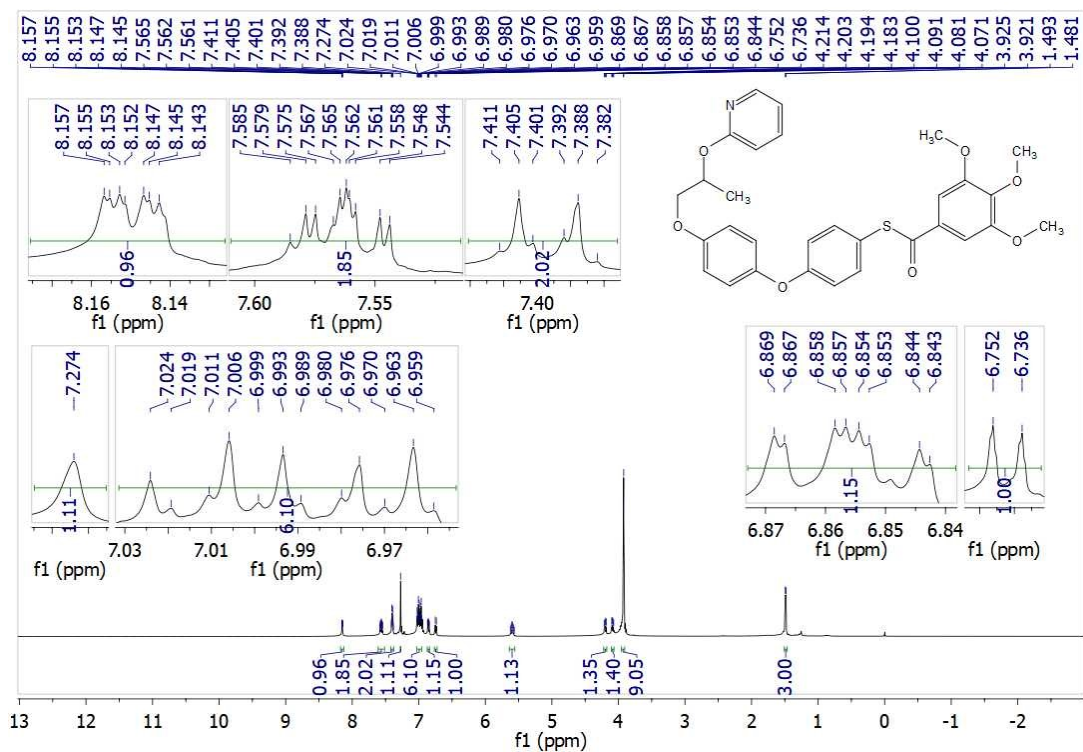

<sup>1</sup>H NMR (500 MHz, CDCl<sub>3</sub>) of compound 48.

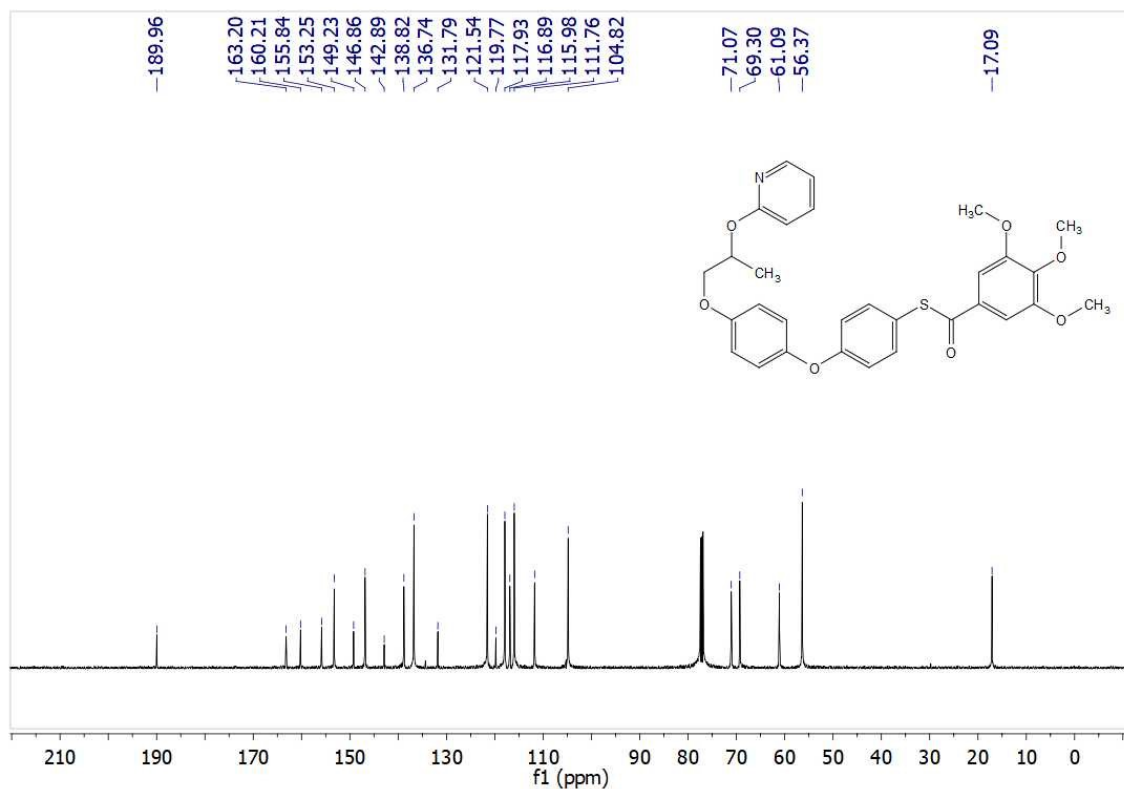

<sup>13</sup>C NMR (126 MHz, CDCl<sub>3</sub>) of compound 48.

## 6. References

- 1) (a) F. Berger, M. B. Plutschack, J. Riegger, W. Yu, S. Speicher, M. Ho, N. Frank, T. Ritter, *Nature*, **2019**, *567*, 223-228; (b) F. Ye, F. Berger, H. Jia, J. Ford, A. Wortman, J. Börgel, C. Genicot, T. Ritter, *Angew. Chem. Int. Ed.* **2019**, *58*, 14615-14619; (c) R. Sang, S. E. Korkis, W. Su, F. Ye, P. S. Engl, F. Berger, T. Ritter, *Angew. Chem. Int. Ed.* **2019**, *58*, 16161-16166; (d) J. Li, J. Chen, R. Sang, W.-S. Ham, M. B. Plutschack, F. Berger, S. Chhabra, A. Schnegg, C. Genicot, T. Ritter, *Nature Chemistry*, **2020**, *12*, 56-62; (e) Y. Zhao, C. Yu, W. Liang, I. L. Atodiresei, and F. W. Patureau, *Chem. Commun.*, **2022**, *58*, 2846-2849.
- 2) M. Toriyama, H. Kamijo, S. Motohashi, T. Takido, K. Itabashi, *Phosphorus, Sulfur, and Silicon*, **2003**, *178*, 1661–1665.
- 3) A. A. Volkov, D. I. Bugaenko, A. V. Bogdanov, and A. V. Karchava, *J. Org. Chem.* **2022**, *87*, 8170–8182.
- 4) W. Liu, H. Hou, H. Jing, S. Huang, W. Ou, and C. Su, *Org. Lett.* **2023**, *25*, 8350-8355.
- 5) C. G. Hatchard, C. A. Parker, *Proc. R. Soc. (London)*, **1956**, *235*, 518-536.
- 6) M. Montalti, A. Credi, L. Prodi, M. T. Gandolfi, *Handbook of Photochemistry*, *Taylor Francis*, **2006**.
- 7) E. E. Wegner, A. W. Adamson, *J. Am. Chem. Soc.* **1966**, *88*, 394-404.

8) (a) A. Beillard, X. Bantreil, T.-X. Métro, J. Martinez and F. Lamaty, *Green Chem.*, **2018**, 20, 964–968; (b) B. Saxena, R. I. Patel, S. Sharma, A. Sharma, *Green Chem.*, **2024**, 26, 2721-2729; (c) Y. Zhang, J. Mao, Z. Wang, L. Tang and Z. Fan, *Green Chem.*, 2024, Advance Article, DOI: <https://doi.org/10.1039/D4GC02901A>; (d) D. J. C. Constable, A. D. Curzons and V. L. Cunningham, *Green Chem.*, 2002, 4, 521–527; (e) P. Yan, R. Zeng, B. Bao, X.-M. Yang, L. Zhu, B. Pan, S.-L. Niu, X.-W. Qi, Y.-L. Li and Q. Ouyang, *Green Chem.*, 2022, 24, 9263–9268; (f) K. Van Aken, L. Streckowski and L. Patiny, *Beilstein J. Org. Chem.*, **2006**, 2, 3.

9) C. Lai, B. J. Backes, *Tetrahedron Lett.*, **2007**, 48, 3033-3037.
